# Supplementary material for: Flow-Based Network Analysis of the Caenorhabditis elegans Connectome
Source: PLoS Comput Biol. 2016 Aug 5;12(8):e1005055. doi: 10.1371/journal.pcbi.1005055 (PMC4975510; doi:10.1371/journal.pcbi.1005055)
Supplement: S1 Data — (XLSX) [file pcbi.1005055.s001.xlsx]

## Sheet: Full MS Scan
Markov time	0.01	0.0102329	0.0104713	0.0107152	0.0109648	0.0112202	0.0114815	0.011749	0.0120226	0.0123027	0.0125893	0.0128825	0.0131826	0.0134896	0.0138038	0.0141254	0.0144544	0.0147911	0.0151356	0.0154882	0.0158489	0.0162181	0.0165959	0.0169824	0.017378	0.0177828	0.018197	0.0186209	0.0190546	0.0194984	0.0199526	0.0204174	0.020893	0.0213796	0.0218776	0.0223872	0.0229087	0.0234423	0.0239883	0.0245471	0.0251189	0.025704	0.0263027	0.0269153	0.0275423	0.0281838	0.0288403	0.0295121	0.0301995
Number of communities	256	253	253	253	252	250	248	247	246	244	244	243	240	239	237	236	236	235	235	233	233	233	232	232	230	228	225	225	221	221	221	214	214	211	206	202	202	193	193	189	188	186	186	184	183	176	175	172	171
VI	0.000295627	0.000259288	0.000346454	0.000377882	0.000240381	0.000240381	0.000240381	0.000362414	0.00031306	0.000346454	0.000734403	0.00103298	0.00219448	0.00229393	0.00279326	0.0026576	0.00299547	0.00132738	0.0016014	0.00266619	0.00138659	0.00144865	0.00197114	0.00221961	0.00265665	0.00581653	0.00960067	0.0130765	0.0136997	0.01369	0.0141267	0.0155328	0.0152673	0.0178804	0.0188533	0.0193775	0.0201515	0.0203021	0.0188871	0.0176388	0.0200589	0.0215388	0.019528	0.0180081	0.0195161	0.0200676	0.0212631	0.0198251	0.0183465
Stability	0.98065	0.980423	0.980192	0.979955	0.979713	0.979465	0.979212	0.978953	0.978689	0.978418	0.978142	0.97786	0.977571	0.977277	0.976975	0.976667	0.976352	0.976031	0.975704	0.975369	0.975027	0.974677	0.974319	0.973953	0.973578	0.973196	0.972807	0.972409	0.972003	0.971587	0.971162	0.970728	0.970285	0.969833	0.969371	0.9689	0.96842	0.967933	0.967436	0.966929	0.966412	0.965885	0.965346	0.964794	0.964231	0.963657	0.963073	0.962477	0.961868
Community assignment
IL2DL	1	1	1	1	1	1	1	1	1	1	1	1	1	1	1	1	1	1	1	1	1	1	1	1	1	1	1	1	4	4	4	1	1	4	4	1	1	2	2	3	2	2	2	2	2	3	3	3	3
IL2VL	2	2	2	2	2	2	2	2	2	2	2	2	2	2	2	2	2	2	2	2	2	2	2	2	2	2	2	2	1	1	1	2	2	1	1	10	10	12	12	15	1	15	15	3	8	8	8	1	1
IL2L	3	3	3	3	3	3	3	3	3	3	3	3	3	3	3	3	3	3	3	3	3	3	3	3	3	3	3	3	50	50	50	50	50	48	2	46	46	1	1	1	40	1	1	1	1	38	1	2	2
URADL	4	4	4	4	4	4	4	4	4	4	4	4	6	4	6	4	4	4	4	6	6	6	6	6	5	4	4	4	4	4	4	11	11	2	4	1	1	2	2	3	2	2	2	2	2	3	3	3	3
IL1VL	5	5	5	5	5	5	5	5	5	5	5	5	4	5	4	7	7	5	5	5	4	4	5	5	6	5	5	5	2	2	2	5	5	5	6	4	4	4	4	2	3	3	3	5	5	12	13	8	10
IL2DR	6	6	6	6	6	6	6	6	6	6	6	6	5	6	5	5	5	6	6	17	5	5	17	17	4	13	6	6	3	3	3	14	14	3	3	2	2	17	17	13	17	18	18	17	15	11	10	11	17
IL1DL	7	7	7	7	7	7	7	7	7	7	7	7	6	4	6	4	4	4	4	6	6	6	6	6	5	4	4	4	4	4	4	1	1	4	4	1	1	2	2	3	2	2	2	2	2	3	3	3	3
OLLL	8	8	8	8	8	8	8	8	8	8	8	8	7	7	7	6	6	7	7	7	7	7	7	7	24	24	7	7	5	5	5	4	4	22	5	3	3	3	3	4	4	4	4	4	4	15	4	14	5
IL1L	9	9	9	9	9	9	9	9	9	9	9	9	8	8	4	7	7	5	5	5	4	4	5	5	6	5	5	5	2	2	2	5	5	5	6	4	4	4	4	2	3	3	3	5	5	2	2	4	4
URYDL	10	10	10	10	10	10	10	10	10	10	10	10	9	9	8	8	8	8	8	8	8	8	8	8	7	6	8	8	6	6	6	6	6	6	7	5	5	5	5	5	5	5	5	6	6	4	5	5	6
OLQDL	11	11	11	11	11	11	11	11	11	11	11	11	10	10	9	9	9	9	9	9	9	9	9	9	8	7	9	9	7	7	7	7	7	7	8	6	6	6	6	6	6	6	6	7	7	19	21	19	7
URYDR	12	12	12	12	12	12	12	12	12	12	12	12	11	11	10	10	10	10	10	10	10	10	10	10	14	8	16	16	8	8	8	8	8	14	9	7	7	7	7	14	7	7	7	8	11	5	11	6	8
IL2R	13	13	13	13	13	13	13	13	13	13	13	13	12	12	11	11	11	11	11	11	11	11	11	11	9	9	10	10	9	9	9	9	9	8	44	8	8	8	8	7	19	8	8	9	37	6	6	40	20
URYVL	14	14	14	14	14	14	14	14	14	14	14	14	13	13	12	12	12	12	12	12	12	12	12	12	10	10	11	11	10	10	10	10	10	9	10	9	9	9	9	8	8	9	9	10	3	7	7	7	9
RIPL	15	15	15	15	15	15	15	15	15	15	15	15	14	14	13	13	13	13	13	4	13	13	4	4	16	15	12	12	11	11	11	11	11	2	1	10	10	13	13	9	9	10	10	11	13	12	13	8	10
OLLR	16	16	16	16	16	16	16	16	16	16	16	16	15	15	32	14	14	32	32	13	14	14	13	13	11	11	13	13	27	27	27	26	26	11	25	11	11	10	10	10	10	11	11	21	18	9	19	9	11
URBL	17	42	43	17	17	17	17	17	41	17	41	40	40	16	14	38	38	14	14	14	36	36	14	14	12	35	33	33	12	12	12	12	12	12	12	12	12	29	29	11	11	12	12	12	22	22	24	22	12
IL2VR	18	17	17	18	18	34	34	35	17	35	17	32	32	33	30	15	15	15	15	15	15	15	15	15	29	29	15	15	13	13	13	13	13	13	23	13	13	22	22	22	12	13	13	13	9	18	9	18	22
IL1DR	19	18	18	19	19	18	18	18	18	18	18	17	16	17	15	16	16	16	16	16	16	16	16	16	13	12	6	6	3	3	3	14	14	3	3	2	2	17	17	13	17	18	18	17	15	11	10	11	17
URADR	20	19	19	20	20	19	19	19	19	19	19	18	17	18	16	17	17	17	17	17	5	5	17	17	4	13	16	16	8	8	8	8	8	14	9	7	7	7	7	14	17	18	18	17	15	11	10	11	17
IL1R	21	20	20	21	21	20	20	20	20	20	20	19	18	19	17	18	18	18	18	18	17	17	18	18	15	14	17	17	14	14	14	15	15	15	13	14	14	11	11	12	14	14	14	14	28	10	12	16	13
URAVL	22	21	21	22	22	21	21	21	21	21	21	20	19	20	18	19	19	19	19	19	18	18	19	19	16	15	12	12	11	11	11	2	2	1	1	10	10	12	12	15	1	15	15	3	8	8	8	1	1
OLQVL	23	22	22	23	23	22	22	22	22	22	22	21	20	21	19	20	20	20	20	20	19	19	20	20	17	16	24	24	21	21	21	16	16	16	19	19	19	20	20	20	13	21	21	18	12	1	17	10	14
RMED	24	23	23	24	24	23	23	23	23	23	23	22	21	22	20	21	21	21	21	21	20	20	21	21	18	17	18	18	15	15	15	17	17	10	11	15	15	13	13	9	9	10	10	11	13	12	13	8	10
URBR	25	50	24	51	25	50	49	24	50	24	50	49	22	47	45	22	22	45	45	22	45	45	22	22	42	18	41	41	16	16	16	18	18	38	14	35	35	14	14	34	30	33	33	14	28	30	31	30	31
OLQDR	26	24	25	25	26	24	24	25	24	25	24	23	23	23	21	23	23	22	22	23	21	21	23	23	19	19	19	19	34	34	34	19	19	17	15	30	30	15	15	16	15	16	16	15	24	25	15	24	15
URYVR	27	25	26	26	27	25	25	26	25	26	25	24	24	24	22	24	24	23	23	24	22	22	24	24	20	20	20	20	17	17	17	20	20	18	16	16	16	16	16	17	16	17	17	16	14	14	16	13	16
RIPR	28	26	27	27	28	26	26	27	26	27	26	25	25	25	23	25	25	24	24	25	23	23	25	25	21	21	21	21	18	18	18	3	3	19	3	15	15	17	17	13	17	18	18	17	15	11	10	11	17
RMEL	29	27	28	28	29	27	27	28	27	28	27	26	26	26	24	26	26	25	25	26	24	24	26	26	22	22	22	22	19	19	19	21	21	20	17	17	17	18	18	18	20	23	23	22	16	17	20	17	21
BAGL	30	28	29	29	30	28	28	29	28	29	28	27	27	27	25	27	27	26	26	27	25	25	27	27	23	23	23	23	20	20	20	22	22	21	18	18	18	19	19	19	73	20	20	72	69	67	68	68	18
CEPVL	31	29	30	30	31	29	29	30	29	30	29	28	28	28	26	28	28	27	27	28	26	26	7	7	24	24	7	7	5	5	5	16	16	16	19	19	19	20	20	20	13	21	21	18	12	1	17	10	14
BAGR	32	30	31	31	32	30	30	31	30	31	30	29	29	29	27	29	29	28	28	29	27	27	28	28	25	25	25	25	22	22	22	23	23	23	20	20	20	21	21	21	18	22	22	19	71	16	18	15	19
OLQVR	33	31	32	32	33	31	31	32	31	32	31	30	30	30	28	30	30	29	29	30	28	28	29	29	26	26	26	26	23	23	23	9	9	8	44	8	8	8	8	7	19	8	8	9	37	6	6	40	20
URAVR	34	32	33	33	34	32	32	33	32	33	32	31	31	31	29	31	31	30	30	31	29	29	30	30	27	27	27	27	24	24	24	24	24	24	21	21	21	11	11	12	14	14	14	20	10	10	12	16	13
RMER	35	33	34	34	35	33	33	34	33	34	33	35	35	32	33	32	32	33	33	32	30	30	31	31	28	28	29	29	25	25	25	27	27	25	22	23	23	24	24	24	20	23	23	22	16	17	20	17	21
IL1VR	36	34	35	35	36	34	34	35	17	35	17	32	32	33	30	15	15	15	15	15	15	15	15	15	29	29	15	15	13	13	13	13	13	13	23	13	13	22	22	22	12	13	13	13	9	18	9	18	22
RID	37	35	36	36	37	35	35	36	34	36	34	33	33	34	31	33	33	31	31	33	31	31	32	32	30	30	28	28	26	26	26	25	25	26	24	22	22	23	23	23	24	166	166	26	17	23	25	158	23
CEPVR	38	36	37	37	38	36	36	37	35	37	35	34	34	35	32	14	14	32	32	13	14	14	13	13	11	11	13	13	27	27	27	26	26	11	25	11	11	10	10	10	10	11	11	21	18	9	19	9	11
RMEV	39	37	38	38	39	37	37	38	36	38	36	35	35	32	33	32	32	33	33	32	30	30	31	31	28	28	29	29	25	25	25	27	27	25	22	23	23	24	24	24	20	23	23	22	16	17	20	17	21
CEPDL	40	38	39	39	40	38	38	39	37	39	37	36	36	36	34	34	34	34	34	34	32	32	33	33	31	31	14	14	28	28	28	28	28	27	26	24	24	25	25	132	116	24	24	7	7	19	21	19	7
RMDVL	41	39	40	40	41	39	39	40	38	40	38	37	37	37	35	35	35	35	35	35	33	33	34	34	32	32	30	30	29	29	29	29	29	28	27	25	25	26	26	25	21	25	25	23	19	20	22	20	24
SAAVL	42	40	41	41	42	40	40	41	39	41	39	38	38	38	36	36	36	36	36	36	34	34	35	35	33	33	31	31	30	30	30	30	30	29	197	26	26	27	27	75	22	175	175	24	20	165	166	73	164
SMDVL	43	41	42	42	43	41	41	42	40	42	40	39	39	39	37	37	37	37	37	37	35	35	36	36	34	34	32	32	31	31	31	31	31	30	28	27	27	28	28	26	23	26	26	25	21	21	23	21	25
URXL	44	42	43	17	17	17	17	17	41	17	41	40	40	16	14	38	38	14	14	14	36	36	14	14	12	35	33	33	12	12	12	12	12	12	12	12	12	29	29	11	11	12	12	12	22	22	24	22	12
ALA	45	43	44	43	44	42	42	43	42	43	42	41	41	40	38	39	39	38	38	38	37	37	37	37	35	36	34	34	32	32	32	32	32	31	29	28	28	23	23	23	24	166	166	26	17	23	25	158	23
RMDVR	46	44	45	44	45	43	43	44	43	44	43	42	42	41	39	40	40	39	39	39	38	38	38	38	36	37	35	35	33	33	33	33	33	32	30	29	29	30	30	28	25	28	28	27	23	24	26	23	26
CEPDR	47	45	46	45	46	44	44	45	44	45	44	43	43	42	40	41	41	40	40	40	39	39	39	39	37	38	19	19	34	34	34	19	19	17	15	30	30	15	15	16	15	16	16	15	24	25	15	24	15
AVAL	48	46	47	46	47	45	45	46	45	46	45	44	44	43	41	42	42	41	41	41	40	40	40	40	38	39	36	36	35	35	35	34	34	33	31	31	31	31	31	29	26	29	29	28	25	26	27	25	27
RIAL	49	47	48	47	48	46	46	47	46	47	46	45	45	44	42	43	43	42	42	42	41	41	41	41	39	40	37	37	36	36	36	35	35	34	32	32	32	32	32	30	27	30	30	29	26	27	28	26	28
ASKL	240	237	235	48	234	47	232	232	47	227	47	46	46	223	221	44	44	218	218	216	95	95	216	216	214	214	38	38	37	37	37	36	36	35	193	189	189	33	33	31	28	172	172	30	173	163	162	27	29
SAAVR	50	48	49	49	49	48	47	48	48	48	48	47	47	45	43	45	45	43	43	43	43	43	42	42	40	41	39	39	38	38	38	37	37	36	33	33	33	34	34	32	74	31	31	31	70	28	29	28	68
RMDL	51	49	50	50	50	49	48	49	49	49	49	48	48	46	44	46	46	44	44	44	44	44	43	43	41	42	40	40	39	39	39	38	38	37	34	34	34	35	35	33	29	32	32	32	27	29	30	29	30
URXR	25	50	24	51	25	50	49	24	50	24	50	49	22	47	45	22	22	45	45	22	45	45	22	22	42	18	41	41	16	16	16	18	18	38	14	35	35	14	14	34	30	33	33	14	28	30	31	30	31
SMDVR	52	51	51	52	51	51	50	50	51	51	51	50	50	48	46	47	47	46	46	46	46	46	44	44	43	43	42	42	40	40	40	39	39	39	36	36	36	36	36	35	31	34	34	33	29	53	53	51	32
AFDL	127	52	52	53	122	124	123	51	121	121	120	51	51	117	114	114	114	112	112	47	47	47	45	45	111	44	109	109	97	97	97	40	40	40	51	37	37	37	37	36	32	35	35	81	77	74	32	31	33
AVAR	54	53	53	54	53	52	51	52	53	53	53	52	52	50	47	49	49	48	48	48	48	48	46	46	44	45	44	44	42	42	42	41	41	41	37	38	38	38	38	37	33	36	36	34	31	31	33	32	34
RIAR	55	54	54	55	54	53	52	53	54	54	54	53	53	51	48	50	50	49	49	49	49	49	47	47	45	46	45	45	43	43	43	42	42	42	38	39	39	39	39	38	34	37	37	35	32	32	34	33	35
ASKR	238	235	233	235	232	54	53	229	230	55	226	228	54	221	49	51	51	50	50	214	50	50	214	214	46	97	46	46	204	204	204	43	43	43	191	40	40	40	40	175	175	38	38	36	171	33	35	163	36
AVEL	56	55	55	56	55	55	54	54	55	56	55	54	55	52	50	52	52	51	51	51	51	51	48	48	47	48	47	47	45	45	45	44	44	44	39	41	41	41	41	39	35	39	39	37	33	34	36	35	37
ADLL	57	56	56	57	56	56	55	55	56	57	56	55	56	53	51	53	53	52	52	52	52	52	49	49	48	49	48	48	46	46	46	45	45	45	40	42	42	42	42	40	36	40	40	38	34	35	37	36	38
ADFL	58	60	57	58	57	57	60	58	57	61	61	56	57	57	52	58	58	53	53	53	57	57	50	50	49	50	49	49	51	51	51	46	46	49	45	47	47	43	43	43	41	43	43	39	38	39	38	37	40
RMDR	59	57	58	59	58	58	56	56	58	58	57	57	58	54	53	54	54	54	54	54	53	53	51	51	50	51	50	50	47	47	47	47	47	46	41	43	43	44	44	41	37	41	41	40	35	36	39	38	39
AFDR	123	121	119	60	59	59	57	121	117	59	58	119	59	114	110	55	55	108	108	55	54	54	108	108	107	52	51	51	48	48	48	48	48	99	42	44	44	45	45	42	38	81	81	41	36	37	40	76	75
SIBDL	60	58	77	61	78	60	58	75	59	76	59	58	76	55	69	56	56	66	66	71	55	55	52	52	51	66	52	52	49	49	49	49	49	47	43	45	45	57	57	54	39	52	52	53	47	49	41	39	49
RIH	61	59	59	62	60	61	59	57	60	60	60	59	60	56	55	57	57	55	55	56	56	56	53	53	52	53	3	3	50	50	50	50	50	48	2	46	46	1	1	1	40	1	1	1	1	38	1	40	20
AWBL	58	60	57	58	57	57	60	58	57	61	61	56	57	57	52	58	58	53	53	53	57	57	50	50	49	50	49	49	51	51	51	46	46	49	45	47	47	43	43	43	41	43	43	39	38	39	38	37	40
AVER	62	61	60	63	61	62	61	59	61	62	62	60	61	58	56	59	59	56	56	57	58	58	54	54	53	54	53	53	52	52	52	51	51	50	46	48	48	46	46	44	42	44	44	42	39	40	42	41	41
RMDDL	63	62	61	64	62	63	62	60	62	63	63	61	62	59	57	60	60	57	57	58	59	59	55	55	54	55	54	54	53	53	53	52	52	51	47	49	49	47	47	45	43	45	45	43	40	41	43	42	42
AWCL	64	63	62	65	63	64	63	61	63	64	64	62	63	72	68	68	68	58	58	59	68	68	62	62	55	56	55	55	54	54	54	62	62	52	48	50	50	55	55	52	83	84	84	44	41	42	52	78	43
ADFR	65	64	63	66	64	65	64	62	64	65	65	63	64	60	58	63	63	61	61	60	62	62	56	56	56	57	57	57	57	57	57	53	53	55	49	51	51	50	50	47	44	46	46	47	42	43	44	43	44
ASGL	66	65	64	67	65	66	65	63	65	102	66	99	65	61	92	93	93	90	90	61	42	42	89	89	88	88	86	86	55	55	55	54	54	80	77	52	52	48	48	71	75	42	42	45	30	163	162	27	29
SAADL	67	66	65	68	66	67	66	64	66	66	67	64	66	62	59	61	61	59	59	62	60	60	57	57	57	58	219	219	96	96	96	94	94	89	85	81	81	190	190	186	185	182	182	181	180	172	172	69	168
ADLR	68	67	66	69	67	68	67	65	67	67	68	65	67	63	60	62	62	60	60	63	61	61	58	58	58	59	56	56	56	56	56	55	55	53	50	53	53	49	49	49	45	47	47	50	74	46	72	72	46
AWAL	69	68	67	70	68	69	68	66	68	52	69	66	68	64	61	48	48	47	47	64	82	82	78	78	59	44	109	109	97	97	97	40	40	40	51	37	37	37	37	36	32	35	35	81	77	74	32	31	33
AWBR	70	69	68	71	69	70	69	67	69	68	70	67	69	65	62	63	63	61	61	60	62	62	56	56	56	57	57	57	57	57	57	53	53	55	49	51	51	50	50	47	44	46	46	47	42	43	44	43	44
ASIL	71	70	69	72	70	71	70	68	70	69	71	68	70	66	63	74	74	71	71	65	105	105	69	69	60	71	68	68	69	69	69	67	67	63	52	50	50	55	55	52	83	84	84	44	41	42	52	78	43
ASHL	72	71	70	73	71	72	71	69	71	70	72	69	71	67	64	64	64	62	62	66	63	63	59	59	61	60	58	58	58	58	58	57	57	56	53	55	55	51	51	48	47	48	48	48	44	45	45	45	71
SIBDR	73	72	71	74	72	73	72	70	119	71	118	121	119	68	112	112	112	110	110	67	64	64	77	77	62	61	59	59	77	77	77	58	58	71	67	68	68	66	66	63	48	60	60	49	54	57	56	46	45
ASGR	74	73	72	75	73	74	73	115	110	72	73	70	72	69	104	65	65	102	102	103	65	65	102	102	101	62	99	99	59	59	59	59	59	94	54	87	87	83	83	49	49	78	78	50	74	46	72	72	46
AIBL	75	74	73	76	74	75	74	71	72	73	74	71	73	70	66	66	66	63	63	68	66	66	60	60	63	63	60	60	60	60	60	60	60	57	55	57	57	53	53	50	50	49	49	51	45	47	46	47	47
ASHR	76	75	74	77	75	76	75	72	73	74	75	72	74	71	67	67	67	64	64	69	67	67	61	61	64	64	61	61	61	61	61	61	61	58	56	58	58	54	54	51	51	50	50	52	95	48	47	75	74
AWCR	77	76	75	78	76	77	76	73	74	64	64	62	63	72	68	68	68	58	58	59	68	68	62	62	55	56	55	55	54	54	54	62	62	52	48	50	50	55	55	52	83	84	84	44	41	42	52	78	43
AWAR	78	77	76	79	77	78	77	74	75	75	76	73	75	73	54	69	69	65	65	70	69	69	63	63	65	65	62	62	62	62	62	63	63	59	42	59	59	56	56	53	52	51	51	76	46	71	73	74	48
SIBVL	60	58	77	61	78	60	58	75	59	76	59	58	76	55	69	56	56	66	66	71	55	55	52	52	51	66	52	52	49	49	49	49	49	47	43	45	45	57	57	54	39	52	52	53	47	49	41	39	49
RIVL	79	78	78	80	79	79	78	76	76	77	77	74	77	74	70	70	70	67	67	72	70	70	64	64	66	67	63	63	64	64	64	64	64	135	128	128	128	119	119	58	57	56	56	56	48	50	48	48	53
SMDDL	80	79	79	81	80	80	79	77	77	78	78	75	78	75	71	71	71	68	68	73	71	71	65	65	67	68	64	64	65	65	65	65	65	60	58	60	60	58	58	55	53	53	53	54	49	51	49	49	50
SAADR	81	80	80	82	81	81	80	78	78	79	79	76	79	76	72	72	72	69	69	74	72	72	66	66	68	69	65	65	66	66	66	200	200	87	83	190	190	78	78	177	177	173	173	170	67	65	163	66	66
RMHL	82	141	139	142	139	142	140	79	139	80	137	77	80	135	131	132	132	130	130	127	73	73	67	67	69	128	66	66	67	67	67	118	118	61	59	108	108	59	59	56	54	97	97	95	94	90	50	93	51
RMDDR	83	81	81	83	82	82	81	80	79	81	80	78	81	77	73	73	73	70	70	75	74	74	68	68	70	70	67	67	68	68	68	66	66	62	60	61	61	60	60	57	55	54	54	55	50	52	51	50	52
ASIR	84	82	82	84	83	83	82	81	80	82	81	79	82	66	63	74	74	71	71	65	105	105	69	69	60	62	99	99	59	59	59	59	59	94	54	87	87	83	83	49	49	78	78	50	74	46	72	72	46
AVHL	85	83	83	85	84	84	83	82	81	83	82	80	83	78	74	75	75	72	72	76	75	75	70	70	71	72	69	69	70	70	70	68	68	64	61	62	62	61	61	86	56	55	55	85	83	83	79	81	81
AVHR	86	84	84	86	85	85	84	83	82	84	83	81	84	79	75	76	76	73	73	77	76	76	71	71	72	73	117	117	71	71	71	69	69	65	62	63	63	90	90	90	90	88	88	88	86	83	79	81	81
RIVR	87	85	85	87	86	86	85	84	83	85	84	82	85	80	76	77	77	74	74	78	77	77	72	72	73	74	70	70	72	72	72	70	70	66	57	64	64	62	62	58	57	56	56	56	48	50	48	48	53
AIBR	88	86	86	88	87	87	86	85	84	86	85	83	86	81	77	78	78	75	75	79	78	78	73	73	74	75	71	71	73	73	73	71	71	67	63	65	65	63	63	59	58	57	57	57	51	54	54	52	54
RIBL	89	87	87	89	88	88	87	86	85	87	86	84	87	82	78	79	79	76	76	80	79	79	74	74	75	76	72	72	74	74	74	72	72	74	71	71	71	68	68	60	59	63	63	77	75	55	74	53	72
RMFL	90	88	88	90	89	89	88	87	86	88	87	85	88	83	79	80	80	77	77	81	80	80	75	75	76	77	73	73	75	75	75	73	73	69	65	66	66	64	64	61	60	58	58	58	52	13	14	12	55
AVBL	91	89	89	91	90	90	89	88	87	89	88	86	89	84	80	81	81	78	78	82	81	81	76	76	77	78	74	74	76	76	76	74	74	70	66	67	67	65	65	62	61	59	59	59	53	56	55	54	56
SIBVR	92	90	90	92	91	91	90	89	88	90	89	87	90	85	65	82	82	79	79	83	64	64	77	77	62	61	59	59	77	77	77	58	58	71	67	68	68	66	66	63	48	60	60	49	54	57	56	46	45
ASEL	93	91	91	93	92	92	91	90	89	91	90	88	91	86	81	83	83	80	80	64	82	82	78	78	59	102	75	75	41	41	41	75	75	72	68	54	54	37	37	46	46	61	61	46	43	76	69	44	69
AVJR	94	92	92	94	93	93	92	91	90	92	91	89	92	87	82	84	84	81	81	84	83	83	79	79	78	79	76	76	78	78	78	76	76	75	69	69	69	69	69	64	62	62	62	60	55	58	57	56	58
AUAL	95	93	93	95	94	94	93	92	91	93	92	90	93	88	83	85	85	82	82	85	84	84	80	80	79	80	77	77	79	79	79	77	77	73	70	70	70	67	67	65	63	27	27	61	38	39	38	37	40
SIADL	96	94	94	96	95	95	94	93	92	94	93	91	94	89	84	86	86	83	83	86	85	85	81	81	80	81	78	78	80	80	80	78	78	74	71	71	71	68	68	60	59	63	63	77	75	55	74	53	72
RMHR	97	95	95	97	96	143	141	94	140	95	94	92	95	90	85	133	133	131	131	128	132	132	82	82	81	129	79	79	123	123	123	79	79	116	72	109	109	101	101	66	100	64	64	96	56	91	58	55	57
AVJL	98	96	96	98	97	96	95	95	93	96	95	93	96	91	86	87	87	84	84	87	86	86	83	83	82	82	80	80	81	81	81	76	76	75	69	69	69	69	69	64	62	62	62	60	55	58	57	56	58
ASER	99	97	97	99	98	97	96	96	94	97	96	94	97	92	87	88	88	85	85	88	87	87	84	84	83	83	81	81	82	82	82	80	80	76	94	44	44	45	45	42	38	81	81	41	36	37	40	76	75
AVBR	100	98	98	100	99	98	97	97	95	98	97	95	98	93	88	89	89	86	86	89	88	88	85	85	84	84	82	82	83	83	83	81	81	77	73	72	72	70	70	67	64	65	65	62	57	59	59	57	59
RIBR	101	99	99	101	100	99	98	98	96	99	98	96	99	94	89	90	90	87	87	90	89	89	86	86	85	85	83	83	84	84	84	82	82	91	88	84	84	71	71	68	76	75	75	78	58	72	60	58	73
RMFR	102	100	100	102	101	100	99	99	97	100	99	97	100	95	90	91	91	88	88	91	90	90	87	87	86	86	84	84	85	85	85	83	83	78	75	73	73	72	72	69	65	66	66	63	59	78	61	59	79
SMDDR	103	101	101	103	102	101	100	100	98	101	100	98	101	96	91	92	92	89	89	92	91	91	88	88	87	87	85	85	86	86	86	84	84	79	76	74	74	73	73	70	66	67	67	64	60	60	62	60	60
AIAL	104	102	102	104	103	102	101	101	65	102	66	99	65	61	92	93	93	90	90	61	42	42	89	89	88	88	86	86	55	55	55	54	54	80	77	52	52	48	48	31	28	172	172	30	173	163	162	27	29
RIR	105	103	103	105	104	103	102	102	99	103	101	100	102	97	93	94	94	91	91	93	92	92	90	90	89	89	87	87	87	87	87	85	85	81	78	75	75	74	74	27	67	68	68	65	61	44	63	61	61
SMBDL	106	104	104	106	105	104	103	103	100	104	102	101	103	98	94	95	95	92	92	94	93	93	91	91	90	90	88	88	88	88	88	86	86	82	79	76	76	184	184	181	68	69	69	66	62	61	168	62	62
RIML	107	105	105	107	106	105	104	104	101	105	103	102	104	99	95	96	96	93	93	95	94	94	92	92	91	91	89	89	89	89	89	87	87	83	80	77	77	75	75	72	69	70	70	67	63	62	64	63	63
ASJL	240	237	235	48	234	47	232	232	47	227	47	46	46	223	221	44	44	218	218	216	95	95	216	216	214	214	38	38	37	37	37	36	36	35	193	189	189	33	33	31	28	172	172	30	173	163	162	27	29
RIMR	108	106	106	108	107	106	105	105	102	106	104	103	105	100	96	97	97	94	94	96	96	96	93	93	92	92	90	90	90	90	90	88	88	84	81	78	78	76	76	73	70	71	71	68	64	63	65	64	64
AUAR	109	107	107	109	108	107	106	106	103	50	105	104	49	101	97	98	98	95	95	45	97	97	94	94	93	95	94	94	91	91	91	89	89	85	35	35	35	14	14	34	30	33	33	69	65	30	31	30	31
AVDR	110	108	108	110	109	108	107	107	104	107	106	105	106	102	98	99	99	96	96	97	98	98	95	95	94	93	91	91	92	92	92	90	90	86	82	79	79	77	77	74	71	72	72	70	66	64	66	65	65
SMBVR	111	109	236	237	235	235	108	108	232	228	228	106	226	224	222	222	222	219	219	217	99	99	217	217	215	215	92	92	93	93	93	91	91	87	83	190	190	78	78	177	177	173	173	170	67	65	163	66	66
AVDL	112	110	109	111	110	109	109	109	105	108	107	107	107	103	99	100	100	97	97	98	100	100	96	96	95	94	93	93	94	94	94	92	92	88	84	80	80	79	79	76	72	73	73	71	68	66	67	67	67
AINL	113	111	110	112	52	111	110	111	52	109	52	108	109	49	100	101	101	98	98	99	101	101	98	98	97	98	43	43	95	95	95	93	93	90	87	83	83	80	80	46	46	61	61	69	65	76	69	44	69
SMBVL	250	247	248	248	247	110	111	110	106	110	238	109	108	104	232	231	231	229	229	227	229	229	97	97	96	96	95	95	96	96	96	94	94	89	85	81	81	190	190	186	185	182	182	181	180	172	172	69	168
ASJR	238	235	233	235	232	54	53	229	230	55	226	228	54	221	49	51	51	50	50	214	50	50	214	214	46	97	46	46	204	204	204	43	43	43	191	40	40	40	40	175	175	38	38	36	171	33	35	163	36
AINR	53	111	110	112	52	111	110	111	52	109	52	108	109	49	100	101	101	98	98	99	101	101	98	98	97	98	43	43	95	95	95	93	93	90	87	83	83	80	80	71	75	42	42	45	30	76	69	44	69
SIADR	114	112	111	113	111	112	112	112	107	111	108	110	110	105	101	102	102	99	99	100	102	102	99	99	98	99	96	96	98	98	98	82	82	91	88	84	84	71	71	68	76	75	75	78	58	72	60	58	73
AVL	115	113	112	114	112	113	113	113	108	112	109	111	111	106	102	103	103	100	100	101	103	103	100	100	99	100	97	97	99	99	99	95	95	92	89	85	85	81	81	78	77	76	76	73	72	68	70	70	70
RICL	116	114	113	115	113	114	114	114	109	113	110	112	112	107	103	104	104	101	101	102	104	104	101	101	100	101	98	98	100	100	100	96	96	93	90	86	86	82	82	79	78	77	77	74	73	69	71	71	71
AIAR	74	73	72	75	73	74	73	115	110	72	73	70	72	69	104	65	65	102	102	103	65	65	102	102	101	62	99	99	59	59	59	59	59	94	54	87	87	83	83	49	49	78	78	50	74	46	72	72	46
SMBDR	117	115	239	116	238	115	234	235	111	230	111	113	228	108	225	105	105	222	222	219	106	106	221	221	218	103	100	100	209	209	209	204	204	95	91	88	88	182	182	179	179	79	79	75	175	70	166	73	164
AIZR	118	116	114	117	114	116	115	116	112	114	112	114	113	109	105	106	106	103	103	104	107	107	103	103	102	104	101	101	101	101	101	97	97	96	92	89	89	56	56	53	52	51	51	76	46	71	73	74	48
SIAVL	119	117	115	118	115	117	116	117	113	115	113	115	114	110	106	107	107	104	104	105	108	108	104	104	103	105	102	102	102	102	102	98	98	68	64	90	90	68	68	60	59	63	63	77	75	55	74	53	72
SIAVR	120	118	116	119	116	118	117	118	114	116	114	116	115	111	107	108	108	105	105	106	109	109	105	105	104	106	103	103	103	103	103	99	99	97	74	91	91	71	71	68	76	75	75	78	58	72	60	58	73
RICR	121	119	117	120	117	119	118	119	115	117	115	117	116	112	108	109	109	106	106	107	110	110	106	106	105	107	104	104	104	104	104	100	100	98	93	92	92	84	84	80	79	80	80	79	76	73	75	75	74
AIZL	122	120	118	121	118	120	119	120	116	118	116	118	117	113	109	110	110	107	107	108	111	111	107	107	106	108	105	105	107	107	107	56	56	54	97	94	94	86	86	43	32	35	35	81	77	74	32	31	33
AIYR	123	121	119	60	59	59	57	121	117	59	58	119	59	114	110	55	55	108	108	55	54	54	108	108	107	52	51	51	48	48	48	48	48	99	42	44	44	45	45	42	38	81	81	41	36	37	40	76	75
AIMR	124	122	120	122	119	121	120	122	118	119	117	120	118	115	111	111	111	109	109	50	112	112	109	109	108	47	106	106	44	44	44	101	101	100	86	82	82	177	177	77	80	74	74	169	78	161	91	34	76
AIML	125	123	121	123	120	122	121	70	119	71	118	121	119	68	112	112	112	110	110	67	113	113	110	110	109	109	107	107	105	105	105	102	102	101	95	56	56	52	52	81	81	82	82	49	54	57	56	46	45
RIS	126	124	122	124	121	123	122	123	120	120	119	122	120	116	113	113	113	111	111	109	114	114	111	111	110	110	108	108	106	106	106	103	103	102	96	93	93	85	85	82	82	83	83	80	79	75	76	77	77
AIYL	127	52	52	53	122	124	123	51	121	121	120	51	51	117	114	114	114	112	112	47	47	47	45	45	111	44	109	109	97	97	97	40	40	40	51	37	37	37	37	36	32	35	35	81	77	74	32	31	33
VB02	128	125	123	125	123	125	124	124	122	122	121	123	121	118	115	115	115	113	113	110	115	115	112	112	112	111	110	110	108	108	108	104	104	103	98	95	95	87	87	83	84	85	85	82	80	77	77	79	78
AVKR	129	126	124	126	124	126	125	125	123	123	122	124	122	119	116	116	116	114	114	111	116	116	113	113	113	112	111	111	109	109	109	105	105	104	99	96	96	88	88	84	85	86	86	83	81	78	61	59	79
AVKL	130	127	125	127	125	127	126	126	124	124	123	125	123	120	117	117	117	115	115	112	117	117	114	114	114	113	112	112	110	110	110	106	106	105	100	97	97	89	89	85	86	87	87	84	82	79	78	80	80
AVFR	131	132	126	128	130	132	127	131	129	125	124	126	128	121	122	118	118	120	120	117	122	122	119	119	119	118	113	113	113	113	113	110	110	108	101	101	101	90	90	90	90	88	88	88	86	83	79	81	81
SABVL	132	128	127	129	126	128	128	127	125	126	125	127	124	122	118	119	119	116	116	113	118	118	115	115	115	114	114	114	111	111	111	107	107	106	102	98	98	91	91	87	87	89	89	86	84	80	80	82	82
FLPL	133	129	128	130	127	129	129	128	126	127	126	128	125	123	119	120	120	117	117	114	119	119	116	116	116	115	115	115	112	112	112	108	108	107	103	99	99	92	92	88	88	90	90	87	85	81	81	83	83
FLPR	134	130	129	131	128	130	130	129	127	128	127	129	126	124	120	121	121	118	118	115	120	120	117	117	117	116	116	116	112	112	112	108	108	107	103	99	99	92	92	88	88	90	90	87	85	81	81	83	83
SABVR	135	131	130	132	129	131	131	130	128	129	128	130	127	125	121	122	122	119	119	116	121	121	118	118	118	117	135	135	132	132	132	109	109	125	104	100	100	93	93	89	89	105	105	104	103	82	82	84	99
AVFL	131	132	126	128	130	132	127	131	129	125	124	126	128	121	122	118	118	120	120	117	122	122	119	119	119	118	113	113	113	113	113	110	110	108	101	101	101	90	90	90	90	88	88	88	86	83	79	81	81
AQR	136	133	131	133	131	133	132	132	130	130	129	131	129	126	123	123	123	121	121	118	123	123	120	120	120	119	118	118	114	114	114	111	111	109	105	102	102	94	94	91	91	91	91	89	87	84	83	85	84
RIFR	137	134	132	134	132	134	133	133	131	131	130	132	130	127	124	124	124	122	122	119	124	124	121	121	121	120	119	119	115	115	115	112	112	110	157	103	103	95	95	92	92	92	92	139	88	133	84	86	132
ADEL	162	160	159	135	157	135	160	134	132	132	155	133	131	128	149	125	125	123	123	120	125	125	122	122	122	121	120	120	116	116	116	135	135	133	106	126	126	136	136	93	93	114	114	112	111	106	105	87	85
VB01	138	135	133	136	133	136	134	135	133	133	131	134	132	129	125	126	126	124	124	121	126	126	123	123	123	122	121	121	117	117	117	113	113	111	107	104	104	96	96	94	94	93	93	90	89	85	85	88	86
ADER	139	136	134	137	134	137	135	136	134	134	132	135	133	130	126	127	127	125	125	122	127	127	124	124	124	123	122	122	118	118	118	114	114	202	108	194	194	97	97	95	95	177	177	175	90	167	86	89	165
DB02	140	137	135	138	135	138	136	137	135	135	133	136	134	131	127	128	128	126	126	123	128	128	125	125	125	124	123	123	119	119	119	131	131	112	124	122	122	114	114	111	96	110	110	91	108	86	87	105	87
ADAR	141	138	136	139	136	139	137	138	136	136	134	137	135	132	128	129	129	127	127	124	129	129	126	126	126	125	124	124	120	120	120	115	115	113	109	105	105	98	98	96	97	94	94	92	91	87	88	90	88
ADAL	142	139	137	140	137	140	138	139	137	137	135	138	136	133	129	130	130	128	128	125	130	130	127	127	127	126	125	125	121	121	121	116	116	114	110	106	106	99	99	97	98	95	95	93	92	88	89	91	89
RIGR	143	140	138	141	138	141	139	140	138	138	136	139	137	134	130	131	131	129	129	126	131	131	128	128	128	127	126	126	122	122	122	117	117	115	111	107	107	100	100	98	99	96	96	94	93	89	90	92	90
RMGL	82	141	139	142	139	142	140	79	139	80	137	77	80	135	131	132	132	130	130	127	73	73	67	67	69	128	66	66	67	67	67	118	118	61	59	108	108	59	59	56	54	97	97	95	94	90	50	93	51
RMGR	144	142	140	143	96	143	141	94	140	95	94	92	95	90	85	133	133	131	131	128	132	132	82	82	81	129	79	79	123	123	123	79	79	116	72	109	109	101	101	66	100	64	64	96	56	91	58	55	57
RIFL	145	143	141	144	140	144	142	141	141	139	138	140	138	136	132	134	134	132	132	129	133	133	129	129	129	130	127	127	124	124	124	119	119	117	112	110	110	102	102	99	101	98	98	129	130	123	92	123	91
AVG	146	144	142	145	141	145	143	230	142	140	139	141	225	222	220	221	221	217	217	215	219	219	215	215	213	213	209	209	205	205	205	199	199	197	192	188	188	178	178	176	176	171	171	173	172	162	161	164	161
VA01	147	145	143	146	142	146	144	142	143	141	140	142	139	137	133	135	135	133	133	130	134	134	130	130	130	131	128	128	125	125	125	120	120	118	113	111	111	103	103	100	102	99	99	97	96	92	93	94	92
SABD	148	146	144	147	143	147	145	143	144	142	141	143	140	138	134	136	136	134	134	131	135	135	131	131	131	132	129	129	126	126	126	121	121	119	114	112	112	104	104	101	103	100	100	98	97	93	94	95	93
RIGL	149	147	145	148	144	148	146	144	145	143	142	144	141	139	135	137	137	135	135	132	136	136	132	132	132	133	130	130	127	127	127	122	122	120	115	113	113	105	105	102	104	19	19	99	98	94	95	96	94
DD01	150	148	146	149	145	149	147	145	146	144	143	145	142	140	136	138	138	136	136	133	137	137	133	133	133	134	131	131	128	128	128	123	123	121	116	114	114	106	106	103	105	101	101	100	99	95	96	97	95
DB01	151	149	147	150	146	150	148	146	147	145	144	146	143	141	137	139	139	137	137	134	138	138	134	134	134	135	132	132	129	129	129	124	124	122	117	115	115	107	107	104	106	102	102	101	100	96	97	98	96
AS01	152	150	148	151	147	151	149	147	148	146	145	147	144	142	138	140	140	138	138	135	139	139	135	135	135	136	133	133	130	130	130	125	125	123	118	116	116	108	108	105	107	103	103	102	101	97	98	99	97
VD01	153	151	149	152	148	152	150	148	149	147	146	148	145	143	139	141	141	139	139	136	140	140	136	136	136	137	134	134	131	131	131	126	126	124	119	117	117	109	109	106	108	104	104	103	102	98	99	100	98
DA01	154	152	150	153	149	153	151	149	150	148	147	149	146	144	140	142	142	140	140	137	141	141	137	137	137	117	135	135	132	132	132	109	109	125	104	100	100	93	93	89	89	105	105	104	103	82	82	84	99
VD02	155	153	151	154	150	154	152	150	151	149	148	150	147	145	141	143	143	141	141	138	142	142	138	138	138	138	136	136	133	133	133	127	127	126	120	118	118	110	110	107	109	106	106	105	104	99	100	101	100
VA02	156	154	152	155	151	155	153	151	152	150	149	151	148	146	142	144	144	142	142	139	143	143	139	139	139	139	137	137	134	134	134	128	128	127	121	119	119	111	111	108	110	107	107	106	105	100	101	102	101
VB03	157	155	153	156	152	156	154	152	153	151	150	152	149	147	143	145	145	143	143	140	144	144	140	140	140	140	138	138	135	135	135	129	129	128	122	120	120	112	112	109	111	108	108	107	106	101	102	103	102
AS02	158	156	154	157	153	157	155	153	154	152	151	153	150	148	144	146	146	144	144	141	145	145	141	141	141	141	139	139	136	136	136	130	130	129	123	121	121	113	113	110	112	109	109	108	107	102	112	104	103
DB03	159	157	155	158	154	158	156	154	155	153	152	154	151	149	145	147	147	145	145	142	146	146	142	142	142	142	140	140	137	137	137	131	131	112	124	122	122	114	114	111	96	110	110	91	108	86	87	105	87
DA02	160	158	156	159	155	159	157	155	156	154	153	155	152	150	146	148	148	146	146	143	147	147	143	143	143	143	141	141	138	138	138	132	132	130	125	123	123	115	115	112	113	111	111	109	109	103	103	106	104
VD03	161	159	157	160	156	160	158	156	157	155	154	156	153	151	147	149	149	147	147	144	148	148	144	144	144	144	142	142	139	139	139	133	133	131	126	124	124	116	116	113	114	112	112	110	110	104	104	107	105
BDUR	183	180	158	161	177	180	159	176	177	175	175	176	154	171	148	150	150	148	148	164	169	169	164	164	166	145	143	143	158	158	158	154	154	132	146	145	145	117	117	114	135	113	113	111	131	105	123	124	106
BDUL	162	160	159	135	157	135	160	134	132	132	155	133	131	128	149	125	125	123	123	120	125	125	122	122	122	121	120	120	116	116	116	135	135	133	106	126	126	136	136	93	93	114	114	112	111	106	105	87	85
VA03	163	161	160	163	158	162	161	157	158	156	156	157	155	153	150	151	151	149	149	145	151	151	145	145	147	146	144	144	141	141	141	136	136	134	127	127	127	118	118	115	117	115	115	113	112	107	106	108	107
SDQR	164	162	161	164	159	163	162	158	159	157	157	158	156	154	151	152	152	150	150	146	152	152	146	146	148	147	145	145	63	63	63	64	64	135	128	128	128	119	119	116	57	56	56	56	48	50	48	48	53
VB04	165	163	162	165	160	164	163	159	160	158	158	159	157	155	152	153	153	151	151	147	153	153	147	147	149	148	146	146	142	142	142	137	137	136	129	129	129	120	120	117	118	116	116	114	114	109	107	109	108
VC01	166	170	163	172	167	171	170	166	161	159	165	166	164	162	159	160	160	158	158	148	154	154	154	154	150	155	147	147	149	149	149	138	138	137	136	130	130	121	121	118	119	123	123	115	121	115	114	110	109
DD02	167	164	164	166	161	165	164	160	162	160	159	160	158	156	153	154	154	152	152	149	155	155	148	148	151	149	148	148	143	143	143	139	139	138	130	131	131	122	122	119	120	117	117	116	115	110	108	111	110
AS03	168	165	165	167	162	166	165	161	163	161	160	161	159	157	154	155	155	153	153	150	156	156	149	149	152	150	149	149	144	144	144	140	140	139	131	132	132	123	123	120	121	118	118	117	116	111	109	112	111
VD04	169	166	166	168	163	167	166	162	164	162	161	162	160	158	155	156	156	154	154	151	157	157	150	150	153	151	150	150	145	145	145	141	141	140	132	133	133	124	124	121	122	119	119	118	117	112	110	113	112
DA03	170	167	167	169	164	168	167	163	165	163	162	163	161	159	156	157	157	155	155	152	158	158	151	151	154	152	151	151	146	146	146	142	142	141	133	134	134	125	125	122	123	120	120	119	118	113	111	114	113
VA04	171	168	168	170	165	169	168	164	166	164	163	164	162	160	157	158	158	156	156	153	159	159	152	152	155	153	152	152	147	147	147	143	143	142	134	135	135	126	126	123	124	121	121	120	119	102	112	104	103
VB05	172	169	169	171	166	170	169	165	167	165	164	165	163	161	158	159	159	157	157	154	160	160	153	153	156	154	153	153	148	148	148	144	144	143	135	136	136	127	127	134	125	122	122	121	120	114	113	127	114
VC02	173	170	163	172	167	171	170	166	161	159	165	166	164	162	159	160	160	158	158	148	154	154	154	154	150	155	147	147	149	149	149	138	138	137	136	130	130	121	121	118	119	123	123	115	121	115	114	110	109
DB04	174	171	170	173	168	172	171	167	168	166	166	167	165	163	160	161	161	159	159	155	161	161	155	155	157	156	154	154	150	150	150	145	145	144	137	137	137	128	128	124	126	124	124	122	122	116	115	115	115
AS04	175	172	171	174	169	173	172	168	169	167	167	168	166	164	161	162	162	160	160	156	162	162	156	156	158	157	155	155	151	151	151	146	146	145	138	138	138	129	129	125	127	125	125	123	123	117	116	116	116
VD05	176	173	172	175	170	174	173	169	170	168	168	169	167	165	162	163	163	161	161	157	163	163	157	157	159	158	156	156	152	152	152	147	147	146	139	139	139	130	130	126	128	126	126	124	124	118	117	117	117
VA05	177	174	173	176	171	175	174	170	171	169	169	170	168	166	163	164	164	162	162	158	164	164	158	158	160	159	157	157	153	153	153	148	148	147	140	140	140	131	131	127	129	127	127	125	125	119	118	118	118
AVM	178	175	174	177	172	176	175	171	172	170	170	171	169	167	164	165	165	163	163	159	165	165	159	159	161	160	158	158	154	154	154	149	149	148	141	145	145	132	132	128	130	128	128	130	126	105	119	119	123
VB06	179	176	175	178	173	177	176	172	173	171	171	172	170	168	165	166	166	164	164	160	166	166	160	160	162	161	159	159	155	155	155	150	150	149	142	141	141	133	133	129	131	129	129	126	127	120	120	120	119
DA04	180	177	176	179	174	178	177	173	174	172	172	173	171	169	166	167	167	165	165	161	167	167	161	161	163	162	160	160	156	156	156	151	151	150	143	142	142	134	134	130	132	130	130	127	128	121	121	121	120
DD03	181	178	177	180	175	179	178	174	175	173	173	174	172	170	167	168	168	166	166	162	168	168	162	162	164	163	161	161	157	157	157	152	152	151	144	143	143	135	135	131	133	131	131	128	129	122	122	122	121
ALML	182	179	178	162	176	161	179	175	176	174	174	175	173	152	168	169	169	167	167	163	150	150	163	163	165	187	162	162	140	140	140	153	153	152	145	126	126	136	136	93	93	114	114	112	111	106	105	87	85
ALMR	183	180	158	161	177	180	159	176	177	175	175	176	154	171	148	150	150	148	148	164	169	169	164	164	166	145	143	143	158	158	158	154	154	132	146	145	145	117	117	114	135	113	113	111	131	105	123	124	106
VC03	184	181	179	181	178	181	180	177	178	176	176	177	174	172	169	170	170	168	168	165	170	170	165	165	167	164	163	163	159	159	159	155	155	153	147	146	146	143	143	140	136	139	139	138	138	131	124	125	137
AS05	185	182	180	182	179	182	181	178	179	177	177	178	175	173	170	171	171	169	169	166	171	171	166	166	168	165	164	164	160	160	160	156	156	154	148	147	147	137	137	133	137	132	132	131	132	125	125	126	124
VD06	186	183	181	183	180	183	182	179	180	178	178	179	176	174	171	172	172	170	170	167	172	172	167	167	169	166	165	165	161	161	161	157	157	155	149	148	148	127	127	134	125	122	122	121	120	114	113	127	114
VA06	187	184	182	184	181	184	183	180	181	179	179	180	177	175	172	173	173	171	171	168	173	173	168	168	170	167	166	166	162	162	162	158	158	156	150	149	149	138	138	135	138	133	133	133	133	127	126	128	126
VB07	188	185	183	185	182	185	184	181	182	180	180	181	178	176	173	174	174	172	172	169	174	174	169	169	171	168	167	167	163	163	163	159	159	157	151	150	150	139	139	136	139	134	134	134	134	128	127	129	127
DB05	189	186	184	186	183	186	185	182	183	181	181	182	179	177	174	175	175	173	173	170	175	175	170	170	172	169	168	168	164	164	164	160	160	158	152	151	151	140	140	137	140	135	135	135	135	129	128	130	128
AS06	190	187	185	187	184	187	186	183	184	182	182	183	180	178	175	176	176	174	174	171	176	176	171	171	173	170	169	169	165	165	165	161	161	159	153	152	152	141	141	138	141	136	136	136	136	130	129	131	129
VD07	191	188	186	188	185	188	187	184	185	183	183	184	181	179	176	177	177	175	175	172	177	177	172	172	174	171	170	170	166	166	166	162	162	160	154	153	153	142	142	139	156	137	137	132	153	126	130	144	125
VC04	193	190	188	189	186	189	189	185	186	184	185	185	182	180	178	179	179	176	176	174	178	178	174	174	175	172	172	172	168	168	168	163	163	162	156	155	155	145	145	142	143	139	139	138	138	131	132	134	130
DA05	192	189	187	190	187	190	188	186	187	185	184	186	183	181	177	178	178	177	177	173	179	179	173	173	176	173	171	171	167	167	167	164	164	161	155	154	154	144	144	141	142	138	138	137	137	132	131	133	131
VC05	193	190	188	189	186	189	189	185	186	184	185	185	182	180	178	179	179	176	176	174	178	178	174	174	175	172	172	172	168	168	168	163	163	162	156	155	155	145	145	142	143	139	139	138	138	131	132	134	130
HSNR	194	191	189	191	188	191	190	187	188	186	186	187	184	182	179	180	180	178	178	175	180	180	175	175	145	174	173	173	169	169	169	134	134	163	157	103	103	95	95	92	92	92	92	139	88	133	84	86	132
HSNL	195	192	190	192	189	192	191	188	189	187	187	188	185	239	180	181	181	179	179	176	181	181	176	176	230	175	225	225	221	221	221	165	165	211	203	202	202	193	193	143	115	184	184	184	139	134	175	172	133
VA07	196	193	191	193	190	193	192	189	190	188	188	189	186	183	181	182	182	180	180	177	182	182	177	177	177	176	174	174	170	170	170	166	166	164	158	156	156	146	146	144	144	140	140	140	140	135	133	132	134
VB08	197	194	192	194	191	194	193	190	191	189	189	190	187	184	182	183	183	181	181	178	183	183	178	178	178	195	175	175	171	171	171	167	167	165	159	171	171	161	161	158	145	141	141	141	155	136	134	146	135
AS07	198	195	193	195	192	195	194	191	192	190	190	191	188	185	183	184	184	182	182	179	184	184	179	179	179	177	176	176	172	172	172	168	168	166	160	157	157	147	147	145	146	142	142	142	141	137	135	135	136
DD04	199	196	194	196	193	196	195	192	193	191	191	192	189	186	184	185	185	183	183	180	185	185	180	180	180	178	177	177	173	173	173	169	169	167	161	158	158	148	148	146	147	143	143	143	142	124	124	125	137
VD08	200	197	195	197	194	197	196	193	194	192	192	193	190	187	185	186	186	184	184	181	186	186	181	181	181	179	178	178	174	174	174	170	170	168	162	159	159	149	149	147	148	144	144	144	143	138	136	136	138
VA08	201	198	196	198	195	198	197	194	195	193	193	194	191	188	186	187	187	185	185	182	187	187	182	182	182	180	179	179	175	175	175	171	171	169	163	160	160	149	149	147	148	144	144	144	143	138	136	136	138
VB09	202	199	197	199	196	199	198	195	196	194	194	195	192	189	187	188	188	186	186	183	188	188	183	183	183	181	180	180	176	176	176	172	172	170	164	161	161	150	150	148	149	145	145	145	144	139	137	137	139
DB06	203	200	198	200	197	200	199	196	197	195	195	196	193	190	188	189	189	187	187	184	189	189	184	184	184	182	181	181	177	177	177	173	173	171	165	162	162	151	151	149	150	146	146	146	145	140	138	138	140
AS08	204	201	199	201	198	201	200	197	198	196	196	197	194	191	189	190	190	188	188	185	190	190	185	185	185	183	182	182	178	178	178	174	174	172	166	163	163	152	152	150	151	147	147	147	146	141	139	139	141
PDEL	205	202	200	202	199	202	201	198	199	197	197	198	195	198	196	191	191	194	194	186	197	197	191	191	192	191	183	183	179	179	179	178	178	195	167	168	168	153	153	173	173	169	169	148	147	142	140	161	142
VD09	206	203	201	203	200	203	202	199	200	198	198	199	196	192	190	192	192	198	198	187	191	191	194	194	187	185	191	191	185	185	185	181	181	173	168	164	164	162	162	151	159	148	148	155	148	146	141	147	143
PDER	207	204	202	204	201	204	203	200	201	199	199	200	197	193	191	193	193	189	189	188	192	192	186	186	188	186	184	184	183	183	183	197	197	174	169	186	186	153	153	173	173	169	169	148	147	142	140	161	142
SDQL	208	205	203	205	202	205	204	201	202	200	200	201	198	194	192	194	194	190	190	189	193	193	187	187	165	187	162	162	140	140	140	153	153	152	145	144	144	155	155	152	134	150	150	150	113	108	142	140	122
DA06	209	206	204	206	203	206	205	202	203	201	201	202	199	195	193	195	195	191	191	190	194	194	188	188	189	188	185	185	180	180	180	175	175	175	170	165	165	156	156	153	153	151	151	151	150	143	143	141	144
PVDL	210	207	205	207	204	207	206	203	204	202	202	203	200	196	194	196	196	192	192	191	195	195	189	189	190	189	186	186	181	181	181	176	176	176	171	166	166	157	157	154	154	152	152	152	151	144	144	142	145
PVDR	211	208	206	208	205	208	207	204	205	203	203	204	201	197	195	197	197	193	193	192	196	196	190	190	191	190	187	187	182	182	182	177	177	177	172	167	167	158	158	155	155	153	153	153	152	145	145	143	146
PVM	212	209	207	209	206	202	201	198	199	197	197	198	195	198	196	191	191	194	194	186	197	197	191	191	192	191	183	183	183	183	183	178	178	174	169	168	168	154	154	156	152	149	149	149	149	142	140	161	142
VA09	213	210	208	210	207	209	208	205	206	204	204	205	202	199	197	198	198	195	195	193	198	198	192	192	193	192	188	188	184	184	184	179	179	178	173	169	169	159	159	139	156	137	137	132	153	126	130	144	125
VB10	214	211	209	211	208	210	217	206	207	213	205	206	203	200	206	199	199	204	204	194	205	205	200	200	194	193	189	189	191	191	191	187	187	184	174	170	170	167	167	157	157	154	154	154	165	152	152	145	153
AS09	235	232	210	212	209	231	209	207	208	205	223	207	222	201	198	200	200	196	196	195	216	216	211	211	195	194	190	190	202	202	202	180	180	179	189	185	185	160	160	172	158	168	168	167	154	159	159	160	148
DD05	215	212	211	213	210	211	210	208	209	206	206	208	204	202	199	201	201	197	197	196	199	199	193	193	196	195	175	175	171	171	171	167	167	165	159	171	171	161	161	158	145	141	141	141	155	136	134	146	135
VD10	216	213	212	214	211	212	211	209	210	207	207	209	205	203	200	202	202	198	198	187	191	191	194	194	187	185	191	191	185	185	185	181	181	173	168	164	164	162	162	151	159	148	148	155	148	146	141	147	143
VA10	217	214	213	215	212	213	212	210	211	208	208	210	206	204	201	203	203	199	199	197	200	200	195	195	197	196	192	192	186	186	186	182	182	180	175	172	172	163	163	159	160	155	155	156	156	147	146	148	149
VB11	218	215	214	216	213	214	213	211	212	209	209	211	207	205	202	204	204	200	200	198	201	201	196	196	198	197	193	193	187	187	187	183	183	189	184	181	181	172	172	160	161	163	163	157	157	148	156	149	147
DB07	219	216	215	217	214	215	214	212	213	210	210	212	208	206	203	205	205	201	201	199	202	202	197	197	199	198	194	194	188	188	188	184	184	181	176	173	173	164	164	161	162	156	156	158	158	149	147	159	150
AS10	220	217	216	218	215	216	215	213	214	211	211	213	209	207	204	206	206	202	202	200	203	203	198	198	200	199	195	195	189	189	189	185	185	182	177	174	174	165	165	162	163	157	157	159	159	150	148	150	151
DA07	221	218	217	219	216	217	216	214	215	212	212	214	210	208	205	207	207	203	203	201	204	204	199	199	201	200	196	196	190	190	190	186	186	183	178	175	175	166	166	163	164	158	158	160	160	151	149	151	152
VD11	222	219	218	220	217	218	217	206	207	213	205	206	203	200	206	199	199	204	204	194	205	205	200	200	194	193	189	189	191	191	191	187	187	184	174	170	170	167	167	157	157	154	154	154	165	152	152	145	153
VA11	223	220	219	221	218	219	218	215	216	215	213	216	211	209	208	209	209	205	205	202	206	206	201	201	202	201	198	198	192	192	192	188	188	185	180	176	176	168	168	165	165	159	159	161	161	153	150	152	154
AS11	224	229	220	230	227	220	226	224	225	214	214	215	219	217	207	208	208	206	206	209	214	214	209	209	203	202	197	197	199	199	199	194	194	192	188	184	184	169	169	164	171	160	160	165	169	157	151	153	155
VD12	225	221	221	222	219	221	219	216	217	215	213	216	211	209	208	209	209	205	205	202	206	206	201	201	202	201	198	198	192	192	192	188	188	185	180	176	176	168	168	165	165	159	159	161	161	153	150	152	154
PVPR	226	222	222	223	220	222	220	217	218	216	215	217	212	210	209	210	210	207	207	203	208	208	202	202	205	203	199	199	194	194	194	189	189	187	181	179	179	171	171	166	166	161	161	162	163	154	153	154	156
PVT	227	223	223	224	221	223	221	218	219	217	216	218	213	211	210	211	211	208	208	204	209	209	203	203	206	204	200	200	195	195	195	190	190	188	182	180	180	188	188	167	167	162	162	179	164	171	154	167	167
VA12	228	224	224	225	222	224	222	219	220	218	217	219	214	212	211	212	212	209	209	205	207	207	204	204	204	205	201	201	193	193	193	191	191	186	183	178	178	170	170	168	168	167	167	166	162	158	155	155	159
DD06	229	225	225	226	223	225	223	220	221	219	218	220	215	213	212	213	213	210	210	206	210	210	205	205	207	206	202	202	196	196	196	183	183	189	184	181	181	172	172	160	161	163	163	157	157	148	156	149	147
PVPL	230	226	226	227	224	226	224	221	222	220	219	221	216	214	213	214	214	211	211	207	211	211	206	206	208	207	203	203	197	197	197	192	192	190	185	182	182	173	173	169	169	164	164	163	166	155	157	156	157
DA08	231	227	227	228	225	227	225	222	223	221	220	222	217	215	214	215	215	212	212	208	212	212	207	207	209	208	204	204	198	198	198	193	193	191	186	183	183	174	174	170	170	165	165	164	167	156	158	157	158
DA09	232	228	228	229	226	228	244	223	224	240	240	223	218	235	215	216	216	212	212	208	212	212	207	207	209	208	204	204	198	198	198	193	193	191	186	183	183	174	174	170	170	165	165	164	167	156	158	157	158
PDB	224	229	220	230	227	220	226	224	225	214	214	215	219	217	207	208	208	206	206	209	214	214	209	209	203	202	197	197	199	199	199	194	194	192	188	184	184	169	169	164	171	160	160	165	169	157	151	153	155
VD13	233	230	229	231	228	229	227	225	226	222	221	224	220	218	216	217	217	214	214	210	215	215	210	210	211	210	206	206	200	200	200	195	195	193	183	178	178	170	170	168	168	167	167	166	162	158	155	155	159
PDA	234	231	230	232	229	230	228	226	227	223	222	225	221	216	217	218	218	213	213	211	213	213	208	208	210	211	205	205	201	201	201	196	196	194	179	177	177	175	175	171	172	160	160	165	169	157	151	153	155
DVB	235	232	210	212	209	231	209	207	208	205	223	207	222	201	198	200	200	196	196	195	216	216	211	211	195	194	190	190	202	202	202	180	180	179	189	185	185	160	160	172	158	168	168	167	154	159	159	160	148
DVA	236	233	231	233	230	232	229	227	228	224	224	226	223	219	218	219	219	215	215	212	217	217	212	212	186	184	207	207	179	179	179	197	197	195	167	186	186	153	153	173	173	169	169	148	147	142	140	161	142
DVC	237	234	232	234	231	233	230	228	229	225	225	227	224	220	219	220	220	216	216	213	218	218	213	213	212	212	208	208	203	203	203	198	198	196	190	187	187	176	176	174	174	170	170	168	170	160	160	162	160
PVQR	238	235	233	235	232	54	53	229	230	55	226	228	54	221	49	51	51	50	50	214	50	50	214	214	46	97	46	46	204	204	204	43	43	43	191	40	40	40	40	175	175	38	38	36	171	33	35	163	36
PHAL	239	236	234	236	233	234	231	231	231	226	227	229	225	222	220	221	221	217	217	215	219	219	215	215	213	213	209	209	205	205	205	199	199	197	192	188	188	178	178	176	176	171	171	173	172	162	161	164	161
PHAR	239	236	234	236	233	234	231	231	231	226	227	229	225	222	220	221	221	217	217	215	219	219	215	215	213	213	209	209	205	205	205	199	199	197	192	188	188	178	178	176	176	171	171	173	172	162	161	164	161
PVQL	240	237	235	48	234	47	232	232	47	227	47	46	46	223	221	44	44	218	218	216	95	95	216	216	214	214	38	38	37	37	37	36	36	35	193	189	189	33	33	31	28	172	172	30	173	163	162	27	29
PLNR	111	109	236	237	235	235	108	108	232	228	228	106	226	224	222	222	222	219	219	217	99	99	217	217	215	215	92	92	93	93	93	91	91	87	83	190	190	78	78	177	177	173	173	170	67	65	163	66	66
LUAL	256	253	237	238	236	250	248	233	246	244	244	230	240	225	237	236	236	235	235	233	220	220	218	218	216	228	210	210	206	206	206	201	201	198	194	191	191	179	179	189	187	186	186	171	168	174	164	169	162
PVCL	241	238	238	239	237	236	233	234	233	229	229	231	227	226	223	223	223	220	220	218	221	221	219	219	217	216	211	211	207	207	207	202	202	199	195	192	192	180	180	178	178	174	174	172	174	164	165	165	163
PHBR	242	239	240	240	239	237	235	236	234	231	230	232	229	227	224	224	224	221	221	220	222	222	220	220	219	217	212	212	208	208	208	203	203	200	196	188	188	181	181	176	176	171	171	173	172	162	161	164	161
ALNL	117	115	239	116	238	115	234	235	111	230	111	113	228	108	225	105	105	222	222	219	106	106	221	221	218	103	100	100	209	209	209	204	204	95	91	88	88	182	182	179	179	79	79	75	175	70	166	73	164
PHBL	242	239	240	240	239	237	235	236	234	231	230	232	229	227	224	224	224	221	221	220	222	222	220	220	219	217	212	212	208	208	208	203	203	200	196	188	188	181	181	176	176	171	171	173	172	162	161	164	161
LUAR	243	240	241	241	240	238	236	237	235	232	231	233	230	228	226	225	225	223	223	221	223	223	222	222	220	218	213	213	210	210	210	205	205	201	198	193	193	183	183	180	180	176	176	174	176	166	167	171	170
ALNR	244	241	242	242	241	239	237	238	236	233	232	234	231	229	227	226	226	224	224	222	224	224	223	223	221	219	214	214	211	211	211	114	114	202	108	76	76	184	184	181	68	69	69	66	62	61	168	62	62
PVCR	245	242	243	243	242	240	238	239	237	234	233	235	232	230	228	227	227	225	225	223	225	225	224	224	222	220	215	215	212	212	212	206	206	203	199	195	195	185	185	182	181	178	178	176	177	168	169	166	166
PQR	246	243	244	244	243	241	239	240	238	235	234	236	233	231	229	228	228	226	226	224	226	226	225	225	223	221	216	216	213	213	213	207	207	204	200	196	196	186	186	183	182	179	179	177	178	169	157	156	157
PVR	247	244	245	245	244	242	240	241	239	236	235	237	234	232	230	229	229	227	227	225	227	227	226	226	224	222	217	217	214	214	214	208	208	205	201	197	197	187	187	184	183	180	180	178	183	170	170	171	170
PVWL	248	245	246	246	245	243	241	242	240	237	236	238	235	233	231	230	230	228	228	226	228	228	227	227	225	223	218	218	215	215	215	209	209	206	202	198	198	189	189	185	184	181	181	180	179	171	171	167	167
PVWR	249	246	247	247	246	244	242	243	241	238	237	239	235	233	231	230	230	228	228	226	228	228	227	227	225	223	218	218	215	215	215	209	209	206	202	198	198	189	189	185	184	181	181	180	179	171	171	167	167
PLNL	250	247	248	248	247	110	111	110	106	110	238	109	108	104	232	231	231	229	229	227	229	229	97	97	96	96	95	95	96	96	96	94	94	89	85	81	81	190	190	186	185	182	182	181	180	172	172	69	168
PHCR	251	248	249	249	248	245	243	244	242	239	239	240	236	234	233	232	232	230	230	228	230	230	228	228	226	224	220	220	216	216	216	210	210	207	187	199	199	191	191	187	186	183	183	182	181	173	173	168	169
PHCL	252	249	253	253	249	246	244	223	224	240	240	223	218	235	215	216	216	231	231	229	231	231	229	229	227	209	221	221	217	217	217	214	214	191	186	183	183	174	174	170	170	165	165	164	167	156	158	157	158
PVNR	253	250	250	250	250	247	245	245	243	241	241	241	237	236	234	233	233	232	232	230	232	232	230	230	228	225	222	222	218	218	218	211	211	208	204	125	125	192	192	188	188	185	185	183	182	175	174	170	171
PLMR	254	251	251	251	251	248	246	246	244	242	242	242	238	237	235	234	234	233	233	231	233	233	231	231	229	226	223	223	219	219	219	212	212	209	205	200	200	187	187	184	183	180	180	178	183	170	170	171	170
PVNL	255	252	252	252	252	249	247	247	245	243	243	243	239	238	236	235	235	234	234	232	149	149	232	232	146	227	224	224	220	220	220	213	213	210	206	201	201	117	117	114	135	113	113	111	131	176	123	124	106
PLML	256	253	237	238	236	250	248	233	246	244	244	230	240	225	237	236	236	231	231	229	231	231	229	229	227	209	221	221	217	217	217	214	214	198	194	191	191	179	179	189	187	186	186	171	168	174	164	169	162
[truncated: 352 more columns]

## Sheet: Individual Neuron Info (partitions assignment + ablation results)
Node ID	Label	Type	A	B	C	D	E	RBS	Pan2010	Pavlovic2014	Infomap	Sohn2011	REGE	CV A	CV B	CV C	CV D	CV E	Double Ablations	Occurrence A	P-value A	Occurrence D	P-value D
1	IL2DL	S	1	1	1	1	1	1	5	8	1	2	4	0	0	0	0	0		1	0.939958	2	0.769605
2	IL2VL	S	1	1	1	1	1	1	5	8	1	2	4	0	0	0	0.00503901	0.00656718		1	0.939958	0	1
3	IL2L	S	1	1	1	1	1	1	5	8	1	2	3	0.00540106	0	0	0.00525102	0		2	0.769605	0	1
4	URADL	S	1	1	1	1	1	3	5	8	1	2	4	0.0061849	0	0	0.00525102	0.0075558		1	0.939958	1	0.939958
5	IL1VL	S	1	1	1	1	1	3	5	8	1	2	3	0	0	0	0.00525102	0.0075558		1	0.939958	0	1
6	IL2DR	S	1	1	1	1	1	1	5	8	1	2	4	0	0	0	0.00525102	0		0	1	0	1
7	IL1DL	S	1	1	1	1	1	3	5	8	1	2	3	0.0061849	0	0	0.00525102	0.0075558		1	0.939958	0	1
8	OLLL	S	1	1	1	1	1	1	5	8	1	2	3	0.0061849	0	0	0.00525102	0.0075558		2	0.769605	0	1
9	IL1L	S	1	1	1	1	1	1	5	8	1	2	3	0	0	0	0	0		2	0.769605	3	0.529432
10	URYDL	S	1	1	1	1	1	1	5	8	1	2	3	0.0131135	0	0	0.00525102	0.0075558		0	1	0	1
11	OLQDL	S	1	1	1	1	1	3	5	8	1	2	3	0.00693471	0	0	0.00525102	0.0075558		1	0.939958	1	0.939958
12	URYDR	S	1	1	1	1	1	1	5	8	1	2	3	0.0061849	0	0	0.00525102	0.0075558		1	0.939958	0	1
13	IL2R	S	1	1	1	1	1	1	5	8	1	2	3	0	0	0	0	0		1	0.939958	3	0.529432
14	URYVL	S	1	1	1	1	1	1	5	8	1	2	3	0	0	0	0.00525102	0		2	0.769605	0	1
15	RIPL	I	1	1	1	1	1	3	5	8	1	2	4	0.0061849	0	0	0.00525102	0.0075558		0	1	0	1
16	OLLR	S	1	1	1	1	1	1	5	8	1	2	3	0	0	0	0	0.0075558		1	0.939958	1	0.939958
17	URBL	S	1	1	1	1	1	3	5	8	1	2	3	0.0061849	0	0	0.00525102	0		1	0.939958	0	1
18	IL2VR	S	1	1	1	1	1	1	5	8	1	2	4	0	0	0	0.00525102	0		1	0.939958	1	0.939958
19	IL1DR	S	1	1	1	1	1	3	5	8	1	2	3	0.0061849	0	0	0.00525102	0.0075558		1	0.939958	1	0.939958
20	URADR	S	1	1	1	1	1	3	5	8	1	2	4	0.0061849	0	0	0.00889383	0.0133475		0	1	0	1
21	IL1R	S	1	1	1	1	1	1	5	8	1	2	3	0	0	0	0.00525102	0.0075558		1	0.939958	1	0.939958
22	URAVL	S	1	1	1	1	1	3	5	8	1	2	4	0	0	0	0.00525102	0.0075558		0	1	0	1
23	OLQVL	S	1	1	1	1	1	3	5	8	1	2	3	0	0	0	0.00525102	0		1	0.939958	0	1
24	RMED	M	1	1	1	1	1	3	5	8	1	2	4	0.0061849	0	0	0.00938573	0.0075558		13	5.59e-06	0	1
25	URBR	S	1	1	1	1	1	1	1	8	1	2	3	0.0061849	0	0	0.00525102	0.0075558		1	0.939958	1	0.939958
26	OLQDR	S	1	1	1	1	1	3	5	8	1	2	3	0	0	0.00689134	0.00525102	0		0	1	1	0.939958
27	URYVR	S	1	1	1	1	1	1	5	8	1	2	3	0	0	0	0	0.0075558		1	0.939958	2	0.769605
28	RIPR	I	1	1	1	1	1	3	5	8	1	2	4	0.0061849	0	0	0.00503901	0.00656718		0	1	1	0.939958
29	RMEL	M	1	1	1	1	1	3	5	8	1	2	4	0	0	0	0	0.00656718		1	0.939958	2	0.769605
30	BAGL	S	1	1	1	1	1	1	5	1	1	2	3	0.0061849	0	0.00689134	0.00525102	0.0075558		0	1	0	1
31	CEPVL	S	1	1	1	1	1	1	5	8	1	2	3	0.0061849	0	0.00728742	0.00525102	0.0075558		2	0.769605	1	0.939958
32	BAGR	S	1	1	1	1	1	1	5	1	1	2	3	0.0061849	0	0	0.00525102	0.0075558		0	1	1	0.939958
33	OLQVR	S	1	1	1	1	1	3	5	8	1	2	3	0.0061849	0	0	0	0.00676057		0	1	3	0.529432
34	URAVR	S	1	1	1	1	1	3	5	8	1	2	4	0	0	0	0.00525102	0		1	0.939958	1	0.939958
35	RMER	M	1	1	1	1	1	3	5	8	1	2	4	0	0	0	0.00754162	0.0075558		2	0.769605	0	1
36	IL1VR	S	1	1	1	1	1	3	5	8	1	2	3	0	0	0	0.00503901	0.00656718		2	0.769605	1	0.939958
37	RID	M	6	4	3	3	2	4	2	7	4	4	3	0.00595424	0	0	0	0		2	0.769605	2	0.769605
38	CEPVR	S	1	1	1	1	1	1	5	8	1	2	3	0.0061849	0	0	0.00754162	0.0075558		0	1	2	0.769605
39	RMEV	M	1	1	1	1	1	3	5	8	1	2	4	0.0157535	0.00643445	0	0.0125841	0.00755511		8	0.00737708	0	1
40	CEPDL	S	1	1	1	1	1	1	5	8	1	2	3	0.0061849	0	0.0128128	0.00525102	0		2	0.769605	0	1
41	RMDVL	M	1	1	1	1	1	3	5	8	1	2	3	0.0061849	0	0.00689134	0.0302376	0.0306757		3	0.529432	1	0.939958
42	SAAVL	I	1	1	1	1	1	2	1	8	1	1	3	0	0	0	0	0.0075558		57	2.66e-57	20	9.61e-12
43	SMDVL	M	1	1	1	1	1	3	5	8	1	2	3	0.0128206	0	0	0.0155176	0.018819		0	1	0	1
44	URXL	S	1	1	1	1	1	1	5	2	1	2	3	0	0	0	0	0		2	0.769605	3	0.529432
45	ALA	I	6	4	3	3	2	1	1	8	1	2	4	0	0	0	0	0		2	0.769605	1	0.939958
46	RMDVR	M	1	1	1	1	1	3	5	8	1	2	3	0.0255099	0.00643445	0.0128128	0.0119944	0.0184736		1	0.939958	2	0.769605
47	CEPDR	S	1	1	1	1	1	1	5	8	1	2	3	0	0	0	0.0125764	0.0075558		1	0.939958	0	1
48	AVAL	I	6	4	3	3	2	4	2	6	1	4	1	0.0395317	0.0126992	0.0761066	0.0185587	0.0208822		0	1	6	0.0624658
49	RIAL	I	1	1	1	1	1	3	5	2	1	2	3	0.0283497	0.00643445	0.0128016	0.0244589	0.0133447		0	1	3	0.529432
50	ASKL	S	2	1	1	1	1	3	1	8	7	1	3	0.00638297	0	0.00728742	0	0.0038236		5	0.14891	7	0.0228449
51	SAAVR	I	1	1	1	1	1	2	3	8	1	1	3	0.0135443	0	0	0.00525102	0		2	0.769605	1	0.939958
52	RMDL	M	1	1	1	1	1	3	5	8	1	2	3	0.0061849	0	0	0.0117068	0.00755511		44	4.29e-39	1	0.939958
53	URXR	S	1	1	1	1	1	1	1	2	1	2	3	0	0	0	0.00525102	0.0075558		0	1	1	0.939958
54	SMDVR	M	1	1	1	1	1	3	5	8	1	2	3	0.0061849	0	0	0.0169146	0.0184674		1	0.939958	1	0.939958
55	AFDL	S	2	1	1	1	1	3	1	1	7	1	3	0.00638297	0	0	0.00525102	0.0075558		1	0.939958	0	1
56	AVAR	I	6	4	3	3	2	4	2	6	1	4	1	0.0179479	0.00643445	0.0758326	0.031832	0.0317633		1	0.939958	1	0.939958
57	RIAR	I	1	1	1	1	1	3	5	2	1	2	3	0.0061849	0.012724	0.0128016	0.0244589	0.0184674		0	1	5	0.14891
58	ASKR	S	2	1	1	1	1	3	1	1	7	1	3	0.00638297	0.00724596	0	0.00525102	0.0038236		4	0.305093	0	1
59	AVEL	I	3	1	1	1	1	1	5	5	1	2	3	0.0135443	0	0.00728742	0.0195224	0.0208842		3	0.529432	1	0.939958
60	ADLL	S	2	1	1	1	1	1	1	2	1	1	3	0.0061849	0	0	0.00525102	0.0075558		0	1	1	0.939958
61	ADFL	S	1	1	1	1	1	1	1	1	1	1	3	0.00664183	0	0	0.00525102	0.0075558		0	1	0	1
62	RMDR	M	1	1	1	1	1	3	5	8	1	2	3	0.0183626	0	0	0.00798449	0.0112774		26	1.23e-17	2	0.769605
63	AFDR	S	2	1	1	1	1	3	1	1	7	1	3	0.00663349	0	0	0	0.0075558		1	0.939958	1	0.939958
64	SIBDL	I	1	1	1	1	1	3	5	8	1	2	4	0.0061849	0	0	0.00525102	0.0075558		1	0.939958	1	0.939958
65	RIH	I	1	1	1	1	1	1	5	8	1	2	3	0.00693471	0	0	0.00889383	0.0075558		1	0.939958	0	1
66	AWBL	S	1	1	1	1	1	1	1	1	1	1	3	0.00693471	0	0.00728742	0.00525102	0.0075558		0	1	1	0.939958
67	AVER	I	1	1	1	1	1	1	5	5	1	2	3	0.0289881	0.0111262	0.00728742	0.0185616	0.0231677		1	0.939958	0	1
68	RMDDL	M	1	1	1	1	1	3	5	8	1	2	3	0	0	0	0.0244589	0.0133475		2	0.769605	2	0.769605
69	AWCL	S	2	1	1	1	1	1	1	1	7	1	3	0.0061849	0	0	0	0		2	0.769605	2	0.769605
70	ADFR	S	2	1	1	1	1	1	1	1	5	1	3	0.00638297	0	0	0.00889383	0.0143078		0	1	1	0.939958
71	ASGL	S	2	1	1	1	1	1	1	1	7	1	3	0.00638297	0	0	0.00889383	0.0075558		2	0.769605	0	1
72	SAADL	I	1	1	1	1	1	1	3	8	1	1	3	0	0	0	0.00525102	0		1	0.939958	1	0.939958
73	ADLR	S	2	1	1	1	1	1	1	2	1	1	3	0.0061849	0	0	0.00525102	0		1	0.939958	1	0.939958
74	AWAL	S	2	1	1	1	1	1	1	1	7	1	3	0.00638297	0	0	0.00525102	0		1	0.939958	0	1
75	AWBR	S	2	1	1	1	1	1	1	1	1	1	3	0.0061849	0	0.00728461	0	0		0	1	4	0.305093
76	ASIL	S	2	1	1	1	1	1	1	1	7	1	3	0.0061849	0	0	0.00525102	0.0075558		2	0.769605	0	1
77	ASHL	S	2	1	1	1	1	1	1	2	1	1	3	0.00638297	0	0.00689134	0.00525102	0.0075558		1	0.939958	1	0.939958
78	SIBDR	I	1	1	1	1	1	3	5	8	1	2	4	0.0061849	0	0.00728742	0.0119944	0.0133475		1	0.939958	4	0.305093
79	ASGR	S	2	1	1	1	1	1	1	1	7	1	3	0.00663349	0	0	0	0.0075558		2	0.769605	1	0.939958
80	AIBL	I	2	1	1	1	1	1	1	2	7	1	3	0.00638835	0.00724596	0	0.00503901	0.00656718		0	1	4	0.305093
81	ASHR	S	2	1	1	1	1	1	1	2	1	1	3	0	0	0.00689134	0.00525102	0.0075558		7	0.0228449	1	0.939958
82	AWCR	S	2	1	1	1	1	1	1	1	7	1	3	0.00693173	0	0	0.00525102	0.0075558		7	0.0228449	0	1
83	AWAR	S	2	1	1	1	1	1	1	1	7	1	3	0.0061849	0	0	0	0.0075558		2	0.769605	2	0.769605
84	SIBVL	I	1	1	1	1	1	4	5	8	1	2	4	0.0121075	0	0	0.00525102	0.00676057		0	1	1	0.939958
85	RIVL	M	1	1	1	1	1	3	5	8	1	2	3	0.00693471	0	0	0	0.0075558		2	0.769605	2	0.769605
86	SMDDL	M	1	1	1	1	1	3	5	8	1	2	3	0.0061849	0	0.00689134	0.00938573	0.0133447		8	0.00737708	1	0.939958
87	SAADR	I	1	1	1	1	1	1	6	2	1	1	3	0.0179432	0	0	0	0		1	0.939958	5	0.14891
88	RMHL	M	1	1	1	1	1	3	5	8	1	2	3	0.0061849	0	0.00689134	0.0126777	0.0151017		1	0.939958	0	1
89	RMDDR	M	1	1	1	1	1	3	5	8	1	2	3	0.0061849	0	0.0128016	0.0244589	0.0259957		5	0.14891	4	0.305093
90	ASIR	S	2	1	1	1	1	1	1	1	7	1	3	0.0061849	0	0	0.00525102	0.0075558		2	0.769605	0	1
91	AVHL	I	2	4	3	1	1	1	1	7	1	5	3	0.00638297	0	0	0.00525102	0.0133475		1	0.939958	1	0.939958
92	AVHR	I	2	4	3	2	2	1	1	7	1	5	3	0.00638297	0	0	0	0		0	1	1	0.939958
93	RIVR	M	1	1	1	1	1	3	5	8	1	2	3	0.0187369	0	0	0.00525102	0.0075558		0	1	0	1
94	AIBR	I	2	1	1	1	1	3	1	2	1	1	3	0.011784	0	0	0.00889383	0.0075558		0	1	0	1
95	RIBL	I	1	1	1	1	1	3	5	2	1	2	3	0.0206959	0.0175604	0.00689134	0.0169393	0.0184674		3	0.529432	0	1
96	RMFL	M	1	1	1	1	1	3	6	8	1	3	3	0.0131135	0	0	0.00525102	0.0075558		1	0.939958	0	1
97	AVBL	I	6	4	3	3	2	4	2	6	1	4	3	0.0192465	0.00609873	0.00728461	0.00938573	0.0075558		0	1	9	0.00212663
98	SIBVR	I	1	1	1	1	1	4	5	8	1	2	4	0.0061849	0	0	0.0126777	0.0075558		0	1	0	1
99	ASEL	S	2	1	1	1	1	1	1	1	7	1	3	0.0061849	0	0	0.00525102	0		1	0.939958	0	1
100	AVJR	I	6	4	3	3	2	1	2	7	1	4	3	0.00638835	0	0.00728461	0.0155338	0.017062		2	0.769605	0	1
101	AUAL	S	1	1	1	1	1	1	5	1	1	2	3	0.0061849	0	0	0.00525102	0.0075558		1	0.939958	1	0.939958
102	SIADL	I	1	1	1	1	1	3	5	8	2	2	4	0	0	0	0.0127883	0.0075558		1	0.939958	0	1
103	RMHR	M	1	1	1	1	1	3	5	8	1	2	4	0	0	0	0.00525102	0.0075558		1	0.939958	0	1
104	AVJL	I	6	4	3	3	2	4	2	7	1	4	3	0.0061849	0.0120648	0	0.00938573	0.00755511		1	0.939958	0	1
105	ASER	S	2	1	1	1	1	1	1	1	7	1	3	0.0156783	0	0	0	0.0075558		1	0.939958	2	0.769605
106	AVBR	I	6	4	3	3	2	4	2	6	1	4	3	0.0123334	0.0229985	0	0.0169393	0.0184674		2	0.769605	1	0.939958
107	RIBR	I	1	1	1	1	1	3	5	2	1	2	3	0	0.0111262	0.00689134	0.0169146	0.0208822		3	0.529432	1	0.939958
108	RMFR	M	1	1	1	1	1	3	6	8	1	3	3	0.0061849	0	0	0.00525102	0		1	0.939958	0	1
109	SMDDR	M	1	1	1	1	1	3	5	8	1	2	3	0.0752854	0	0.00689134	0.00938573	0.0133447		0	1	2	0.769605
110	AIAL	I	2	1	1	1	1	3	1	1	7	1	3	0.0224282	0.0239753	0	0.00798449	0.0112774		33	2.21e-25	0	1
111	RIR	I	1	1	1	1	1	1	5	1	1	1	3	0	0	0	0.00889383	0.0145191		0	1	0	1
112	SMBDL	M	1	1	1	1	1	3	3	2	1	1	3	0.0061849	0	0.00689134	0.00525102	0.0075558		3	0.529432	0	1
113	RIML	M	1	1	1	1	1	3	1	2	1	1	3	0	0	0	0	0.00656718		0	1	13	5.59e-06
114	ASJL	S	2	1	1	1	1	1	1	1	3	1	3	0	0	0	0.00525102	0.00676057		4	0.305093	1	0.939958
115	RIMR	M	1	1	1	1	1	4	1	2	1	1	3	0.00664183	0.013679	0	0.00525102	0.0133475		0	1	2	0.769605
116	AUAR	S	1	1	1	1	1	1	5	1	7	2	3	0.00693471	0	0	0.00525102	0.0075558		1	0.939958	1	0.939958
117	AVDR	I	6	4	3	3	2	1	2	5	1	4	3	0.00638835	0.00609873	0	0.00798449	0.00755511		1	0.939958	0	1
118	SMBVR	M	1	1	1	1	1	3	6	1	1	1	3	0	0	0	0.00525102	0		2	0.769605	0	1
119	AVDL	I	6	4	3	3	2	1	2	5	1	4	3	0	0	0	0.00754162	0		2	0.769605	0	1
120	AINL	I	2	1	1	1	1	1	1	1	7	1	3	0.00638297	0	0	0.00525102	0.0075558		2	0.769605	0	1
121	SMBVL	M	1	1	1	1	1	3	3	1	1	1	3	0	0	0.00689134	0	0		5	0.14891	6	0.0624658
122	ASJR	S	2	1	1	1	1	1	1	1	3	1	3	0.00638297	0	0.00689134	0.00525102	0		3	0.529432	1	0.939958
123	AINR	I	2	1	1	1	1	1	1	1	7	1	3	0	0	0	0.00525102	0		2	0.769605	1	0.939958
124	SIADR	I	1	1	1	1	1	3	5	8	1	2	4	0	0	0	0.00525102	0		2	0.769605	1	0.939958
125	AVL	M	5	2	3	3	2	1	4	7	3	3	3	0.00559393	0.00607863	0	0.00503901	0		0	1	6	0.0624658
126	RICL	I	1	1	1	1	1	1	1	2	1	2	3	0.0061849	0	0.00689134	0.00525102	0.0075558		1	0.939958	0	1
127	AIAR	I	2	1	1	1	1	3	1	1	7	1	3	0.0114935	0.00724905	0.0176747	0.00525102	0.00676057		175	1.29e-292	10	0.000552446
128	SMBDR	M	1	1	1	1	1	3	5	2	1	1	3	0.0128206	0	0	0.00525102	0		2	0.769605	0	1
129	AIZR	I	2	1	1	1	1	1	1	1	5	1	3	0.0218812	0	0	0.00525102	0.0075558		0	1	1	0.939958
130	SIAVL	I	1	1	1	1	1	3	5	8	1	2	4	0.00693471	0	0	0.00525102	0		1	0.939958	1	0.939958
131	SIAVR	I	1	1	1	1	1	3	1	8	1	2	4	0	0	0	0.00525102	0.0075558		1	0.939958	0	1
132	RICR	I	1	1	1	1	1	1	5	8	1	2	3	0	0	0	0.00525102	0.0075558		3	0.529432	0	1
133	AIZL	I	2	1	1	1	1	1	1	1	4	1	3	0.0114935	0	0.00689134	0	0		0	1	5	0.14891
134	AIYR	I	2	1	1	1	1	3	1	1	5	1	3	0.024522	0	0	0.00525102	0.0075558		0	1	0	1
135	AIMR	I	2	1	1	1	1	1	1	1	7	1	3	0	0	0	0	0.0075558		2	0.769605	1	0.939958
136	AIML	I	2	1	1	1	1	1	1	7	3	1	3	0.00663349	0	0.0128128	0.0127883	0.0133475		0	1	1	0.939958
137	RIS	I	1	1	1	1	1	1	5	2	1	2	3	0	0.00643445	0.00689134	0.00889383	0.0143078		11	0.000130367	0	1
138	AIYL	I	2	1	1	1	1	3	1	1	4	1	3	0.0061849	0	0	0	0		1	0.939958	3	0.529432
139	VB02	M	3	2	2	3	2	4	4	9	4	5	3	0.0132938	0	0.00688222	0	0		2	0.769605	11	0.000130367
140	AVKR	I	1	1	1	1	1	3	6	2	1	3	3	0.0131135	0	0	0.00525102	0		1	0.939958	0	1
141	AVKL	I	1	1	1	1	1	3	6	2	1	3	3	0.00693471	0	0	0.00525102	0		5	0.14891	1	0.939958
142	AVFR	I	2	4	3	2	2	1	1	7	3	5	1	0.00638297	0	0.00657647	0.0117068	0.00755511		3	0.529432	0	1
143	SABVL	I	3	2	3	3	2	4	4	4	4	4	3	0.00593439	0	0	0	0		0	1	1	0.939958
144	FLPL	S	6	4	3	3	2	2	2	2	1	4	3	0	0	0	0.00754088	0.00755511		2	0.769605	1	0.939958
145	FLPR	S	6	4	3	3	2	2	2	7	1	4	3	0.00693173	0	0	0	0		0	1	3	0.529432
146	SABVR	I	3	2	3	3	2	4	4	4	4	4	3	0.00593439	0	0	0	0		0	1	1	0.939958
147	AVFL	I	2	4	3	2	1	1	1	7	3	5	1	0.0109954	0.00724596	0.00657647	0.00908396	0.00676057		8	0.00737708	0	1
148	AQR	S	6	4	3	3	2	1	6	7	1	3	3	0	0	0	0	0		2	0.769605	6	0.0624658
149	RIFR	I	2	4	3	3	2	1	2	7	7	4	3	0.00638297	0	0	0	0		2	0.769605	2	0.769605
150	ADEL	S	1	1	1	1	1	1	5	2	1	3	3	0.0061849	0	0.00728461	0.00889383	0.0133475		0	1	1	0.939958
151	VB01	M	3	2	2	3	2	1	6	9	4	5	3	0.0113051	0	0	0	0		1	0.939958	6	0.0624658
152	ADER	S	1	1	1	1	1	1	5	2	1	3	3	0	0	0	0.00525102	0.0075558		2	0.769605	1	0.939958
153	DB02	M	3	2	2	3	2	4	4	4	4	5	3	0.00564152	0	0	0	0		0	1	1	0.939958
154	ADAR	I	2	1	1	1	1	1	1	2	1	1	3	0.0061849	0	0	0	0		1	0.939958	1	0.939958
155	ADAL	I	6	4	3	3	2	1	1	2	1	1	3	0	0	0	0	0		0	1	3	0.529432
156	RIGR	I	1	1	1	1	1	3	5	2	1	3	3	0.0131135	0.00724905	0	0.00503901	0		2	0.769605	1	0.939958
157	RMGL	M	1	1	1	1	1	1	5	2	1	2	3	0	0	0.00728742	0.00503901	0		3	0.529432	1	0.939958
158	RMGR	M	1	1	1	1	1	1	1	2	1	2	3	0.0061849	0	0	0.00525102	0.0075558		1	0.939958	1	0.939958
159	RIFL	I	3	2	2	3	2	1	2	7	1	4	3	0.00593439	0	0	0.00798449	0.00755511		1	0.939958	0	1
160	AVG	S	6	4	3	3	2	1	2	7	3	4	3	0.0061849	0	0	0.00503901	0		1	0.939958	1	0.939958
161	VA01	M	3	2	2	3	2	4	4	4	4	5	3	0.0105808	0	0	0	0		3	0.529432	5	0.14891
162	SABD	I	3	2	2	3	2	4	4	8	4	5	3	0.0105808	0	0	0	0		0	1	2	0.769605
163	RIGL	I	1	1	1	1	1	3	5	2	1	3	3	0.0204729	0.00724596	0.00689134	0.0164261	0.0151017		2	0.769605	0	1
164	DD01	M	3	2	2	3	2	4	4	9	4	5	1	0.0202812	0.0272613	0.0131259	0.00525102	0.00755511		1	0.939958	9	0.00212663
165	DB01	M	3	2	2	3	2	1	4	9	4	5	3	0.00564152	0	0	0	0		0	1	2	0.769605
166	AS01	M	3	2	2	3	2	4	4	4	4	4	3	0.00564152	0	0	0	0		0	1	3	0.529432
167	VD01	M	3	2	2	3	2	4	4	9	4	5	1	0.0437707	0.0485119	0.00657016	0.0169393	0.0184674		0	1	21	1.14e-12
168	DA01	M	3	2	3	3	2	4	4	4	4	4	3	0.0258972	0.0171208	0	0	0		1	0.939958	1	0.939958
169	VD02	M	3	2	2	3	2	4	4	9	4	5	1	0.0314593	0.0561071	0.0251982	0.0164268	0.0184736		4	0.305093	1	0.939958
170	VA02	M	3	2	2	3	2	4	4	4	4	5	3	0.0234434	0.00607863	0	0.00525102	0.0113751		1	0.939958	5	0.14891
171	VB03	M	4	3	2	3	2	4	4	4	4	5	2	0.00584289	0.00543646	0	0	0		1	0.939958	1	0.939958
172	AS02	M	3	2	2	3	2	4	4	4	4	5	3	0.00564152	0	0	0	0		1	0.939958	1	0.939958
173	DB03	M	4	3	2	3	2	4	4	8	4	5	3	0.00584289	0.00543646	0	0	0		1	0.939958	2	0.769605
174	DA02	M	3	2	2	3	2	4	4	4	4	5	3	0.016453	0.00607863	0	0	0		1	0.939958	5	0.14891
175	VD03	M	3	2	2	3	2	4	4	9	4	5	1	0.0186053	0.0118368	0.0500606	0.014229	0.0133475		1	0.939958	2	0.769605
176	BDUR	I	6	4	3	3	2	1	2	7	1	4	3	0	0	0.00728461	0	0		2	0.769605	1	0.939958
177	BDUL	I	6	4	3	1	1	1	2	1	1	4	3	0	0	0	0.00525102	0.0075558		1	0.939958	1	0.939958
178	VA03	M	3	2	2	3	2	4	4	4	4	5	3	0.0061849	0	0	0	0		1	0.939958	8	0.00737708
179	SDQR	I	1	1	1	1	1	1	5	8	1	4	3	0.0061849	0	0	0.00525102	0		1	0.939958	1	0.939958
180	VB04	M	4	3	2	3	2	4	4	4	4	5	3	0.00613576	0	0	0	0		1	0.939958	3	0.529432
181	VC01	M	3	2	2	3	2	1	4	9	4	5	3	0.00593439	0	0	0	0		0	1	2	0.769605
182	DD02	M	4	3	2	3	2	4	4	9	4	5	1	0.0417308	0.0506877	0.0887468	0.049246	0.046339		0	1	184	0
183	AS03	M	3	2	2	3	2	4	4	4	4	5	3	0.00593439	0	0	0	0		1	0.939958	1	0.939958
184	VD04	M	4	3	2	3	2	4	4	9	4	5	1	0.022467	0.0345357	0.00657016	0.00503901	0		1	0.939958	1	0.939958
185	DA03	M	4	3	2	3	2	4	4	4	4	5	3	0.00584289	0.00543646	0	0	0		0	1	1	0.939958
186	VA04	M	4	3	2	3	2	4	4	4	4	5	3	0.00613576	0.00543646	0	0	0		0	1	1	0.939958
187	VB05	M	4	3	2	3	2	4	4	4	4	5	2	0.00613576	0.00543646	0.00657016	0	0		0	1	2	0.769605
188	VC02	M	4	3	2	3	2	1	4	9	4	5	3	0.00613576	0.00543646	0	0	0		1	0.939958	1	0.939958
189	DB04	M	4	3	2	3	2	4	4	4	2	5	3	0.00613576	0.00543646	0	0	0		1	0.939958	1	0.939958
190	AS04	M	4	3	2	3	2	4	4	4	4	5	3	0.00584289	0.00543646	0	0	0		1	0.939958	1	0.939958
191	VD05	M	4	3	2	3	2	4	4	9	4	5	1	0.0166787	0.0107229	0	0	0.0038236		2	0.769605	15	1.75e-07
192	VA05	M	4	3	2	3	2	4	4	4	4	5	3	0.00584289	0.00543646	0	0	0		1	0.939958	2	0.769605
193	AVM	S	6	4	3	3	2	1	2	7	2	4	3	0.00693173	0	0	0	0		0	1	2	0.769605
194	VB06	M	4	3	2	3	2	4	4	4	6	5	2	0.00584289	0.00543646	0	0	0		1	0.939958	1	0.939958
195	DA04	M	4	3	2	3	2	4	4	4	4	5	3	0.00584289	0.00543646	0	0	0		1	0.939958	1	0.939958
196	DD03	M	4	3	2	3	2	4	4	9	4	5	1	0.0851376	0.0738768	0.0723544	0.0127883	0.0171625		1	0.939958	0	1
197	ALML	S	6	4	1	1	1	1	2	2	1	4	3	0	0	0	0.00525102	0.0075558		5	0.14891	1	0.939958
198	ALMR	S	6	4	3	1	1	1	2	8	2	4	3	0.00693173	0	0	0	0		1	0.939958	1	0.939958
199	VC03	M	4	3	2	3	2	1	4	9	4	5	3	0.0215953	0.0197447	0.0138475	0.0169393	0.0184674		2	0.769605	3	0.529432
200	AS05	M	4	3	2	3	2	4	4	4	4	5	3	0.00584289	0.00543646	0	0	0		0	1	1	0.939958
201	VD06	M	4	3	2	3	2	4	4	9	4	5	1	0.0242749	0.0489563	0.0154945	0	0		1	0.939958	16	2.79e-08
202	VA06	M	4	3	2	3	2	4	4	4	4	5	3	0.00584289	0.00543646	0	0	0		1	0.939958	1	0.939958
203	VB07	M	6	4	2	3	2	4	2	4	6	4	3	0	0	0	0	0		2	0.769605	1	0.939958
204	DB05	M	6	4	3	3	2	4	2	3	2	4	3	0	0	0	0	0		1	0.939958	1	0.939958
205	AS06	M	4	3	2	3	2	4	4	4	2	5	3	0.00613576	0.00543646	0	0	0		1	0.939958	1	0.939958
206	VD07	M	4	3	3	3	2	4	4	4	6	5	1	0.0115156	0.00543646	0	0	0		0	1	1	0.939958
207	VC04	M	4	3	2	3	2	1	4	4	3	5	3	0.00584289	0.00543646	0	0.00503901	0		0	1	1	0.939958
208	DA05	M	4	3	2	3	2	4	4	4	4	5	3	0.00638627	0.00543646	0	0	0		1	0.939958	1	0.939958
209	VC05	M	4	3	3	3	2	1	0	7	3	5	3	0.00613576	0.00543646	0	0.00503901	0		0	1	0	1
210	HSNR	M	2	4	3	3	2	1	2	7	4	1	3	0.00638297	0.00724596	0	0.00503901	0		0	1	1	0.939958
211	HSNL	M	2	4	1	1	1	1	1	1	5	1	3	0	0	0	0.00525102	0		6	0.0624658	1	0.939958
212	VA07	M	4	3	2	3	2	4	4	4	6	5	3	0.00613576	0.00543646	0	0	0		2	0.769605	1	0.939958
213	VB08	M	5	4	3	3	2	4	2	3	6	5	3	0.010995	0	0	0	0		1	0.939958	2	0.769605
214	AS07	M	6	4	3	3	2	4	2	3	1	4	3	0	0	0	0	0		2	0.769605	1	0.939958
215	DD04	M	4	3	2	3	2	4	4	4	6	5	1	0.0495122	0.056986	0.01918	0.0125841	0.00755511		3	0.529432	8	0.00737708
216	VD08	M	4	3	2	3	2	4	2	3	6	5	1	0.0158517	0.0107229	0.00657016	0.00514896	0.0038236		3	0.529432	0	1
217	VA08	M	4	3	2	3	2	4	2	3	6	5	3	0.0115156	0.00543646	0	0.00514896	0		0	1	3	0.529432
218	VB09	M	5	4	3	3	2	4	2	3	6	5	3	0.00534342	0.0139745	0	0.00514896	0		0	1	2	0.769605
219	DB06	M	6	4	3	3	2	4	2	3	2	4	3	0	0	0	0	0		2	0.769605	2	0.769605
220	AS08	M	6	4	3	3	2	4	2	3	1	4	3	0	0	0	0	0		0	1	1	0.939958
221	PDEL	S	6	4	3	3	2	1	6	3	2	4	1	0.0054052	0	0	0	0		1	0.939958	2	0.769605
222	VD09	M	5	4	3	3	2	4	2	3	6	5	1	0.0103142	0	0	0	0		3	0.529432	31	4.39e-23
223	PDER	S	5	4	3	3	2	1	6	3	2	4	1	0.00534342	0.0139745	0	0	0		1	0.939958	13	5.59e-06
224	SDQL	I	6	4	3	3	2	2	2	8	1	4	3	0	0	0	0	0		2	0.769605	1	0.939958
225	DA06	M	6	4	3	3	2	4	2	4	2	4	3	0	0	0	0	0		2	0.769605	1	0.939958
226	PVDL	I	6	4	3	3	2	2	2	3	6	4	3	0	0	0	0	0		3	0.529432	1	0.939958
227	PVDR	I	6	4	3	3	2	2	2	3	2	4	2	0.0061849	0	0	0	0		1	0.939958	1	0.939958
228	PVM	S	6	4	3	3	2	1	6	3	2	4	3	0	0	0	0	0		1	0.939958	1	0.939958
229	VA09	M	5	4	3	3	2	4	2	3	6	5	3	0.012839	0	0.0113941	0	0		1	0.939958	15	1.75e-07
230	VB10	M	6	4	3	3	2	4	2	3	8	4	3	0	0	0	0	0		2	0.769605	2	0.769605
231	AS09	M	6	4	3	3	2	4	2	3	8	4	3	0.0054052	0	0	0	0		1	0.939958	1	0.939958
232	DD05	M	5	4	3	3	2	4	2	3	6	5	1	0.0223463	0	0.0538114	0	0		1	0.939958	9	0.00212663
233	VD10	M	5	4	3	3	2	4	2	3	6	5	3	0.0293412	0.0191617	0.0138567	0	0		0	1	7	0.0228449
234	VA10	M	6	4	3	3	2	4	2	3	1	4	3	0	0	0	0	0		2	0.769605	1	0.939958
235	VB11	M	6	4	3	3	2	4	2	3	8	4	3	0	0	0	0	0		0	1	1	0.939958
236	DB07	M	6	4	3	3	2	4	2	3	2	4	3	0	0	0	0	0		2	0.769605	2	0.769605
237	AS10	M	6	4	3	3	2	4	2	4	1	4	3	0	0	0	0	0		3	0.529432	1	0.939958
238	DA07	M	6	4	3	3	2	4	2	3	1	4	3	0.00638835	0	0	0	0		1	0.939958	1	0.939958
239	VD11	M	6	4	3	3	2	2	2	3	8	4	4	0	0	0	0	0		2	0.769605	2	0.769605
240	VA11	M	6	4	3	3	2	4	2	3	8	4	3	0.0061849	0	0	0	0		1	0.939958	5	0.14891
241	AS11	M	6	4	3	3	2	4	2	3	8	4	3	0	0	0	0	0		2	0.769605	1	0.939958
242	VD12	M	6	4	3	3	2	4	2	3	8	4	3	0.0061849	0	0	0	0		1	0.939958	1	0.939958
243	PVPR	I	4	3	2	3	2	1	4	7	1	3	3	0.0138023	0.00543646	0	0.0169393	0.0184674		2	0.769605	5	0.14891
244	PVT	I	1	1	1	1	1	1	6	7	3	3	3	0.00540106	0	0	0.00525102	0.0075558		0	1	1	0.939958
245	VA12	M	6	4	3	3	2	4	2	3	8	4	3	0	0	0	0	0		3	0.529432	1	0.939958
246	DD06	M	6	4	3	1	1	4	2	3	8	4	1	0.0125732	0	0	0.00938573	0		2	0.769605	0	1
247	PVPL	I	6	4	3	3	2	1	6	7	1	3	3	0.0194402	0.0062647	0	0.0155338	0.0133447		1	0.939958	1	0.939958
248	DA08	M	6	4	3	3	2	4	2	3	8	4	3	0	0	0	0	0		2	0.769605	1	0.939958
249	DA09	M	6	4	3	3	2	4	2	3	8	4	3	0	0	0	0	0		4	0.305093	3	0.529432
250	PDB	M	6	4	3	3	2	4	2	3	8	4	4	0	0	0	0	0		1	0.939958	1	0.939958
251	VD13	M	6	4	3	3	2	4	2	3	8	4	3	0.0131227	0	0.0113941	0	0		8	0.00737708	4	0.305093
252	PDA	M	6	4	3	3	2	4	2	3	8	4	4	0	0	0	0	0		0	1	1	0.939958
253	DVB	M	6	4	3	3	2	4	2	3	8	4	3	0.0061849	0	0.00657647	0	0		2	0.769605	3	0.529432
254	DVA	I	6	4	3	3	2	1	6	5	2	4	1	0.0210593	0.017635	0.00728742	0	0		5	0.14891	10	0.000552446
255	DVC	I	5	2	3	3	2	1	4	7	3	3	3	0.0088513	0.0139745	0.00657647	0.0169393	0.0184674		15	1.75e-07	9	0.00212663
256	PVQR	I	2	1	1	1	1	3	1	7	3	1	3	0.00540106	0	0.00689134	0.00525102	0.00676057		19	7.71e-11	0	1
257	PHAL	S	6	4	3	3	2	1	6	3	2	4	3	0	0	0	0	0		2	0.769605	2	0.769605
258	PHAR	S	6	4	3	3	2	1	6	3	2	4	3	0	0	0	0	0		2	0.769605	16	2.79e-08
259	PVQL	I	2	1	1	1	1	3	1	7	3	1	3	0.00638297	0	0.00728461	0.00889383	0.0075558		1	0.939958	0	1
260	PLNR	S	1	1	1	1	1	1	6	1	1	1	4	0.00693471	0	0	0	0		1	0.939958	2	0.769605
261	LUAL	I	6	4	3	3	2	1	2	3	2	4	3	0	0	0	0	0		1	0.939958	1	0.939958
262	PVCL	I	6	4	3	3	2	4	2	6	2	4	3	0.00991324	0.00724596	0	0	0		3	0.529432	7	0.0228449
263	PHBR	S	6	4	3	3	2	2	2	3	2	4	3	0	0	0	0	0		2	0.769605	1	0.939958
264	ALNL	S	1	1	1	1	1	1	1	8	1	1	4	0.00693471	0	0	0	0		1	0.939958	3	0.529432
265	PHBL	S	6	4	3	3	2	2	2	3	2	4	3	0.0061849	0	0	0	0		1	0.939958	1	0.939958
266	LUAR	I	6	4	3	3	2	1	2	3	2	4	3	0.0061849	0	0	0	0		1	0.939958	1	0.939958
267	ALNR	S	1	1	1	1	1	1	5	8	1	1	4	0	0	0	0	0.0075558		4	0.305093	2	0.769605
268	PVCR	I	6	4	3	3	2	4	2	6	2	4	3	0.00638835	0.00643445	0	0	0		5	0.14891	4	0.305093
269	PQR	S	6	4	3	3	2	2	2	3	3	4	3	0	0	0	0	0		0	1	1	0.939958
270	PVR	S	6	4	3	1	1	1	2	5	2	4	3	0.00638835	0	0	0	0.0075558		1	0.939958	4	0.305093
271	PVWL	I	6	4	3	3	2	4	2	3	2	4	3	0	0	0	0	0		1	0.939958	1	0.939958
272	PVWR	I	6	4	3	3	2	1	2	3	2	4	3	0	0	0	0	0		2	0.769605	1	0.939958
273	PLNL	S	1	1	1	1	1	1	3	1	1	1	4	0	0	0	0.00525102	0.0075558		2	0.769605	1	0.939958
274	PHCR	S	6	4	3	3	2	2	2	3	5	4	3	0.0061849	0	0	0	0		0	1	1	0.939958
275	PHCL	S	6	4	3	3	2	1	2	3	5	4	3	0.0121777	0	0	0	0		1	0.939958	1	0.939958
276	PVNR	I	6	4	3	3	2	1	2	7	3	4	3	0	0.012724	0.00728461	0	0		1	0.939958	1	0.939958
277	PLMR	S	6	4	3	3	2	2	2	3	2	4	3	0.00693173	0	0	0	0		1	0.939958	1	0.939958
278	PVNL	I	6	4	3	3	2	1	2	7	3	4	3	0	0.012724	0.00728461	0.00798449	0		2	0.769605	0	1
279	PLML	S	6	4	3	3	2	4	2	3	5	4	4	0	0.00609873	0	0	0		1	0.939958	1	0.939958

## Sheet: Double Ablations
Label1	Label2	CV_A	CV_B	CV_C	CV_D	CV_E	Q_A	Q_D	Type
DD02	VD10	0.0625789	0.0619883	0.10354	0.0777259	0.0738876	0.941	0.9825	'MM'
DD04	DVC	0.066796	0.0587046	0.0341009	0.0618463	0.0622758	0.9615	0.99	'MI'
DD02	VA08	0.0359435	0.0520709	0.0936534	0.0702128	0.0720863	0.85	0.971	'MM'
DD02	VC03	0.0479331	0.0483173	0.0826215	0.0803121	0.0799874	0.9175	0.969	'MM'
PDER	DVC	0.0189665	0.030866	0.062128	0.0491742	0.0565848	0.8	0.9945	'SI'
DD01	VD03	0.026073	0.0255266	0.0617412	0.0484716	0.0556191	0.85	0.9915	'MM'
AVAL	DD02	0.059655	0.0546883	0.103693	0.0823421	0.0785038	0.9245	0.9695	'MI'
DD02	DVA	0.0576511	0.0691684	0.102593	0.0703447	0.0664819	0.9415	0.9765	'MI'
SIBDR	DD02	0.0397349	0.0550826	0.101338	0.0769319	0.072723	0.9135	0.9705	'MI'
AIML	DD02	0.0440616	0.0550826	0.101338	0.0769319	0.072723	0.9275	0.97	'MI'
RIAL	DVC	0.0459535	0.0328273	0.0274949	0.0569728	0.0585095	0.9515	0.9715	'II'
AVFR	DD02	0.0440616	0.0547189	0.0881774	0.0643278	0.0693076	0.928	0.957	'MI'
AVBL	DD02	0.0568194	0.0608245	0.102113	0.0727134	0.0693076	0.942	0.969	'MI'
VA08	DVC	0.0230328	0.0166029	0.00744529	0.0513007	0.0515284	0.85	0.9905	'MI'
VB09	DVC	0.019708	0.0352383	0.0782382	0.0455834	0.0514906	0.85	0.9855	'MI'
RIAR	DVC	0.0238256	0.0369577	0.0274949	0.0602264	0.0606644	0.9	0.9755	'II'
AIAR	DD02	0.0687448	0.0695382	0.106641	0.0723621	0.0684749	0.9695	0.973	'MI'
AWBR	DD02	0.0482725	0.0550826	0.0958332	0.0683026	0.0648722	0.94	0.9745	'MS'
AWBL	DD02	0.0446134	0.0550826	0.0958332	0.0723621	0.0684749	0.929	0.973	'MS'
RMDDL	DD02	0.0512407	0.062278	0.0938691	0.0747314	0.0713011	0.9565	0.9565	'MM'
FLPL	DD02	0.0443508	0.0547189	0.0954414	0.0717496	0.0683192	0.9395	0.97	'MS'
RMGL	DD02	0.0446134	0.0550826	0.101338	0.0673612	0.0639065	0.94	0.968	'MM'
ADAR	DD02	0.0440616	0.0550826	0.0958332	0.0673612	0.0639065	0.9285	0.974	'MI'
ADLR	DD02	0.0391832	0.0550826	0.0958332	0.0673612	0.0639065	0.9115	0.968	'MS'
AINR	DD02	0.0546022	0.0550826	0.0958332	0.0673612	0.0639065	0.963	0.968	'MI'
AVKL	DD02	0.0563564	0.0550826	0.0958332	0.0673612	0.0639065	0.9565	0.968	'MI'
SAADL	DD02	0.0446134	0.0550826	0.0958332	0.0673612	0.0639065	0.94	0.968	'MI'
SIADR	DD02	0.0397349	0.0550826	0.0958332	0.0673612	0.0639065	0.9245	0.968	'MI'
SIAVL	DD02	0.0446134	0.0550826	0.0958332	0.0673612	0.0639065	0.929	0.968	'MI'
URXL	DD02	0.0461142	0.0550826	0.0958332	0.0673612	0.0639065	0.9445	0.974	'MS'
IL2VR	DD02	0.0446134	0.0550826	0.0958332	0.0673612	0.0639065	0.94	0.968	'MS'
URAVR	DD02	0.0446134	0.0550826	0.0958332	0.0673612	0.0639065	0.94	0.968	'MS'
AIZL	DD02	0.0504264	0.0550826	0.0958332	0.0673612	0.0639065	0.938	0.974	'MI'
ASJR	DD02	0.045548	0.0550826	0.0958332	0.0673612	0.0639065	0.9325	0.968	'MS'
OLQDR	DD02	0.0446134	0.0550826	0.0958332	0.0673612	0.0639065	0.94	0.968	'MS'
DD02	HSNL	0.0635326	0.0547189	0.0909896	0.0673612	0.0639065	0.9755	0.968	'MM'
DD02	PLNR	0.0530767	0.0550826	0.0958332	0.0673612	0.0639065	0.95	0.974	'MS'
SAADR	DD02	0.0582224	0.0550826	0.0958332	0.0663845	0.0629057	0.946	0.973	'MI'
SAAVR	DD02	0.0532809	0.0550826	0.0958332	0.0663845	0.0629057	0.9415	0.967	'MI'
SDQR	DD02	0.0446134	0.0550826	0.0958332	0.0663845	0.0629057	0.93	0.967	'MI'
AVL	DD02	0.0397627	0.0538091	0.0978644	0.0662802	0.0628744	0.9145	0.967	'MM'
DD02	VA07	0.0418194	0.0520709	0.0927564	0.0662802	0.0628744	0.921	0.9725	'MM'
DD02	VC04	0.0369409	0.0520709	0.0927564	0.0662802	0.0628744	0.9	0.967	'MM'
DD02	VD04	0.0289322	0.0434284	0.0822427	0.0662802	0.0628744	0.8	0.967	'MM'
DD02	VD05	0.0459373	0.0533333	0.0899068	0.0680484	0.0646926	0.918	0.9745	'MM'
RIAR	DD02	0.0530767	0.0572679	0.0921767	0.0724477	0.0719501	0.9515	0.9535	'MI'
ASKL	DD02	0.0440616	0.0550826	0.0958332	0.0673612	0.0639065	0.928	0.974	'MS'
DD02	AS04	0.02931	0.0492334	0.0899868	0.0653453	0.061915	0.85	0.9715	'MM'
DD02	AS05	0.0418194	0.0520709	0.0927564	0.0653453	0.061915	0.9215	0.9715	'MM'
DD02	AS06	0.0460303	0.0520709	0.0927564	0.0653453	0.061915	0.934	0.9715	'MM'
DD02	AS07	0.0394723	0.0547189	0.0954414	0.0653453	0.061915	0.9235	0.9715	'MM'
DD02	AS08	0.0443508	0.0547189	0.0954414	0.0653453	0.061915	0.9395	0.9715	'MM'
DD02	AS09	0.0443508	0.0547189	0.100728	0.0653453	0.061915	0.9305	0.9715	'MM'
DD02	AS10	0.0394723	0.0547189	0.0954414	0.0653453	0.061915	0.9235	0.9715	'MM'
DD02	AS11	0.0443508	0.0547189	0.0954414	0.0653453	0.061915	0.9395	0.9715	'MM'
DD02	DA04	0.0359139	0.0414201	0.0877533	0.0653453	0.061915	0.85	0.9715	'MM'
DD02	DA05	0.0460303	0.0520709	0.0900388	0.0653453	0.061915	0.934	0.9715	'MM'
DD02	DA06	0.0394723	0.0500906	0.0946125	0.0653453	0.061915	0.9235	0.9715	'MM'
DD02	DA07	0.0443508	0.0547189	0.0954414	0.0653453	0.061915	0.929	0.9715	'MM'
DD02	DA08	0.0464349	0.0607149	0.0978644	0.0653453	0.061915	0.945	0.9715	'MM'
DD02	DA09	0.0443508	0.0547189	0.0978644	0.0653453	0.061915	0.9395	0.9715	'MM'
DD02	DB05	0.0443508	0.0547189	0.0954414	0.0653453	0.061915	0.9395	0.9715	'MM'
DD02	DB06	0.0443508	0.0547189	0.0954414	0.0653453	0.061915	0.9395	0.9715	'MM'
DD02	DB07	0.0527605	0.0547189	0.0954414	0.0653453	0.061915	0.9595	0.9715	'MM'
AVG	DD02	0.0443508	0.0547189	0.100728	0.0653453	0.061915	0.929	0.966	'MS'
RID	DD02	0.0545064	0.0608245	0.098338	0.0653453	0.061915	0.9545	0.9715	'MM'
RIFR	DD02	0.0440616	0.0482889	0.0978768	0.0653453	0.061915	0.928	0.9715	'MI'
ADAL	DD02	0.0443508	0.0547189	0.0954414	0.0653453	0.061915	0.9395	0.9715	'MI'
AVHR	DD02	0.0440616	0.0547189	0.0954414	0.0623618	0.061915	0.928	0.968	'MI'
FLPR	DD02	0.0507207	0.0547189	0.0954414	0.0653453	0.061915	0.945	0.9715	'MS'
DB03	DD02	0.0418194	0.0520709	0.0951867	0.0653453	0.061915	0.9215	0.9715	'MM'
VC01	DD02	0.0344173	0.0486572	0.0951867	0.0653453	0.061915	0.85	0.9715	'MM'
AQR	DD02	0.0394723	0.0500906	0.0946125	0.0653453	0.061915	0.9235	0.9715	'MS'
DB02	DD02	0.0425921	0.0538091	0.0926662	0.0653453	0.061915	0.9245	0.9715	'MM'
VB03	DD02	0.0425623	0.0486306	0.0926662	0.0653453	0.061915	0.924	0.9715	'MM'
DD02	DVB	0.0242152	0.0547189	0.100728	0.0653453	0.061915	0.8	0.9715	'MM'
DD02	HSNR	0.0440616	0.0554853	0.0910815	0.0653453	0.061915	0.928	0.966	'MM'
DD02	LUAL	0.0443508	0.0547189	0.0954414	0.0653453	0.061915	0.9395	0.9715	'MI'
DD02	LUAR	0.0394723	0.0547189	0.0954414	0.0653453	0.061915	0.9125	0.9715	'MI'
DD02	PDA	0.0443508	0.0547189	0.0954414	0.0653453	0.061915	0.9395	0.9715	'MM'
DD02	PDB	0.0443508	0.0547189	0.0954414	0.0653453	0.061915	0.9395	0.9715	'MM'
DD02	PDEL	0.0495869	0.0547189	0.0954414	0.0653453	0.061915	0.9445	0.9715	'MS'
DD02	PHAL	0.0394723	0.0547189	0.0954414	0.0653453	0.061915	0.9235	0.9715	'MS'
DD02	PHAR	0.0443508	0.0547189	0.0954414	0.0653453	0.061915	0.9395	0.9715	'MS'
DD02	PHBL	0.0394723	0.0547189	0.0954414	0.0653453	0.061915	0.9125	0.9715	'MS'
DD02	PHBR	0.0394723	0.0547189	0.0954414	0.0653453	0.061915	0.9235	0.9715	'MS'
DD02	PHCL	0.0544869	0.0547189	0.0954414	0.0653453	0.061915	0.946	0.9715	'MS'
DD02	PHCR	0.0527605	0.0547189	0.0954414	0.0653453	0.061915	0.9505	0.9715	'MS'
DD02	PLML	0.0443508	0.0547189	0.0881774	0.0653453	0.061915	0.9395	0.9715	'MS'
DD02	PLMR	0.0485266	0.0547189	0.0954414	0.0653453	0.061915	0.9395	0.9715	'MS'
DD02	PQR	0.044336	0.0547189	0.0954414	0.0653453	0.061915	0.9395	0.9715	'MS'
DD02	PVDL	0.0443508	0.0547189	0.0954414	0.0653453	0.061915	0.9395	0.9715	'MI'
DD02	PVDR	0.0443508	0.0547189	0.0954414	0.0653453	0.061915	0.929	0.9715	'MI'
DD02	PVM	0.0443508	0.0547189	0.100728	0.0653453	0.061915	0.9395	0.9715	'MS'
DD02	PVWL	0.0394723	0.0547189	0.098338	0.0653453	0.061915	0.9235	0.9715	'MI'
DD02	PVWR	0.0443508	0.0547189	0.0954414	0.0653453	0.061915	0.9395	0.9715	'MI'
DD02	VA04	0.0387319	0.0492334	0.0928991	0.0653453	0.061915	0.91	0.9715	'MM'
DD02	VA05	0.0332813	0.0520709	0.0927277	0.0653453	0.061915	0.85	0.9715	'MM'
DD02	VA06	0.0369409	0.0520709	0.0927564	0.0653453	0.061915	0.9	0.9715	'MM'
DD02	VA10	0.0443508	0.0547189	0.0954414	0.0653453	0.061915	0.9395	0.9715	'MM'
DD02	VA12	0.0394723	0.0547189	0.098338	0.0653453	0.061915	0.9235	0.9715	'MM'
DD02	VB06	0.0369409	0.0520709	0.0927564	0.0653453	0.061915	0.9	0.9715	'MM'
DD02	VB07	0.0394723	0.0547189	0.0926662	0.0653453	0.061915	0.9235	0.9715	'MM'
DD02	VB08	0.0380728	0.0547189	0.0978644	0.0653453	0.061915	0.85	0.9715	'MM'
DD02	VB09	0.0380728	0.0649191	0.094697	0.0653453	0.061915	0.9085	0.9655	'MM'
DD02	VB10	0.0394723	0.0547189	0.0954414	0.0653453	0.061915	0.9235	0.9715	'MM'
DD02	VB11	0.0443508	0.0547189	0.0954414	0.0653453	0.061915	0.9395	0.9715	'MM'
DD02	VC02	0.0418194	0.0520709	0.0927564	0.0653453	0.061915	0.921	0.9715	'MM'
DD02	VD11	0.0443508	0.0547189	0.0954414	0.0653453	0.061915	0.9395	0.9715	'MM'
DD02	VD12	0.0394723	0.0547189	0.100728	0.0653453	0.061915	0.9125	0.9715	'MM'
DD02	VD13	0.0527605	0.0547189	0.0954414	0.0653453	0.061915	0.941	0.9715	'MM'
RIAL	DD02	0.068853	0.0558306	0.0881506	0.0709236	0.0682088	0.9525	0.9515	'MI'
RIBR	DD02	0.0446134	0.0612887	0.0874347	0.0775752	0.0719501	0.94	0.9665	'MI'
AVJR	DD02	0.0458422	0.0673341	0.102614	0.0697123	0.0699562	0.9335	0.9595	'MI'
ADFR	DD02	0.0440616	0.0550826	0.0958332	0.0723621	0.0684749	0.928	0.9695	'MS'
DD02	AS03	0.043373	0.0538091	0.0979018	0.064375	0.0609203	0.9265	0.9705	'MM'
DD02	DA03	0.0236419	0.0486306	0.0926662	0.064375	0.0609203	0.8	0.9705	'MM'
VB02	DD02	0.0470526	0.0529837	0.100008	0.064375	0.0609203	0.9265	0.9705	'MM'
ALA	DD02	0.0443508	0.0547189	0.0954414	0.064375	0.0609203	0.9395	0.9705	'MI'
DB01	DD02	0.0467465	0.0529837	0.095056	0.064375	0.0609203	0.937	0.9705	'MM'
AS01	DD02	0.0385653	0.0538091	0.0926662	0.064375	0.0609203	0.91	0.9705	'MM'
SABD	DD02	0.0456511	0.0597781	0.0926662	0.064375	0.0609203	0.9265	0.9705	'MI'
SABVR	DD02	0.0385653	0.0597781	0.0922401	0.064375	0.0609203	0.9095	0.9705	'MI'
SABVL	DD02	0.043373	0.0597781	0.0849689	0.064375	0.0609203	0.9265	0.9705	'MI'
DD02	SDQL	0.0485266	0.0547189	0.0954414	0.064375	0.0609203	0.9505	0.9705	'MI'
RMDDR	DD02	0.0355995	0.0486306	0.0921767	0.0724477	0.0738345	0.85	0.9535	'MM'
ADEL	DD02	0.0463623	0.0550826	0.101338	0.0713912	0.0674799	0.935	0.9685	'MS'
AVBR	DVC	0.0357788	0.0418203	0.0706053	0.0556693	0.0560989	0.954	0.98	'II'
IL1VR	DD02	0.0446134	0.0550826	0.0958332	0.0673612	0.0639065	0.94	0.968	'MS'
RIPR	DD02	0.0446134	0.0550826	0.0958332	0.0673612	0.0639065	0.93	0.968	'MI'
AIBL	DD02	0.0504264	0.0612887	0.0938691	0.0673612	0.0639065	0.945	0.968	'MI'
DD02	VA09	0.0428511	0.0547189	0.0920425	0.0632439	0.0605796	0.914	0.9695	'MM'
ASJL	DD02	0.0440616	0.0550826	0.0958332	0.0673612	0.0639065	0.9385	0.968	'MS'
OLQVR	DD02	0.0488243	0.0550826	0.0958332	0.0673612	0.0639065	0.9415	0.974	'MS'
RID	VD13	0.0365092	0.00601571	0.0174402	0.0330247	0.0373309	0.962	0.995	'MM'
DD02	ALNR	0.0446134	0.0550826	0.0958332	0.0673612	0.0639065	0.94	0.974	'MS'
CEPVL	DD02	0.0446134	0.0550826	0.101338	0.0673612	0.0639065	0.93	0.968	'MS'
ASHL	DD02	0.0440616	0.0550826	0.0982635	0.0673612	0.0639065	0.928	0.968	'MS'
ADER	DD02	0.0446134	0.0550826	0.0958332	0.0673612	0.0639065	0.94	0.968	'MS'
AIMR	DD02	0.0391832	0.0550826	0.0958332	0.0673612	0.0639065	0.9225	0.974	'MI'
AIZR	DD02	0.0458019	0.0550826	0.0958332	0.0673612	0.0639065	0.9105	0.968	'MI'
ASGL	DD02	0.0286595	0.0550826	0.0958332	0.0673612	0.0639065	0.85	0.964	'MS'
ASGR	DD02	0.0352781	0.0550826	0.0958332	0.0673612	0.0639065	0.85	0.974	'MS'
AUAL	DD02	0.0446134	0.0550826	0.0958332	0.0673612	0.0639065	0.93	0.968	'MS'
AUAR	DD02	0.0397349	0.0550826	0.0958332	0.0673612	0.0639065	0.9125	0.968	'MS'
CEPDR	DD02	0.0397349	0.0550826	0.0958332	0.0673612	0.0639065	0.9245	0.96	'MS'
CEPVR	DD02	0.0446134	0.0550826	0.0958332	0.0673612	0.0639065	0.93	0.9655	'MS'
IL1DR	DD02	0.0446134	0.0550826	0.0958332	0.0673612	0.0639065	0.93	0.968	'MS'
OLLR	DD02	0.0446134	0.0550826	0.0958332	0.0673612	0.0639065	0.94	0.974	'MS'
RIH	DD02	0.0397349	0.0550826	0.0958332	0.0673612	0.0639065	0.9125	0.964	'MI'
RIVL	DD02	0.0466724	0.0550826	0.0958332	0.0673612	0.0639065	0.935	0.974	'MM'
RMGR	DD02	0.0446134	0.0550826	0.0958332	0.0673612	0.0639065	0.93	0.968	'MM'
SIADL	DD02	0.0446134	0.0550826	0.0958332	0.0673612	0.0639065	0.94	0.9595	'MI'
SIBDL	DD02	0.0551684	0.0550826	0.0958332	0.0673612	0.0639065	0.9555	0.968	'MI'
URADL	DD02	0.0446134	0.0550826	0.0958332	0.0673612	0.0639065	0.93	0.968	'MS'
URBR	DD02	0.0488243	0.0550826	0.0958332	0.0673612	0.0639065	0.9415	0.968	'MS'
URXR	DD02	0.0446134	0.0550826	0.0958332	0.0673612	0.0639065	0.94	0.968	'MS'
BAGR	DD02	0.0488243	0.0550826	0.0958332	0.0673612	0.0639065	0.9415	0.968	'MS'
IL1R	DD02	0.0488243	0.0550826	0.0958332	0.0673612	0.0639065	0.951	0.968	'MS'
ASHR	DD02	0.0440616	0.0550826	0.0958332	0.0673612	0.0639065	0.9385	0.968	'MS'
BDUL	DD02	0.0443508	0.0619107	0.0954414	0.0673612	0.0639065	0.9395	0.968	'MI'
SIBVR	DD02	0.0406925	0.0550826	0.0924407	0.0673612	0.0639065	0.917	0.9595	'MI'
DD02	PLNL	0.0446134	0.0550826	0.0958332	0.0673612	0.0639065	0.94	0.968	'MS'
DD02	PVR	0.0527605	0.0547189	0.0954414	0.0673612	0.0639065	0.9505	0.974	'MS'
DD02	PVT	0.031991	0.0550826	0.0958332	0.0673612	0.0639065	0.85	0.968	'MI'
VB04	DD02	0.0523744	0.0520709	0.0951867	0.063368	0.0598892	0.95	0.9695	'MM'
VA01	DD02	0.043373	0.0538091	0.0928991	0.063368	0.0598892	0.919	0.9695	'MM'
AS02	DD02	0.0456578	0.0538091	0.0926662	0.063368	0.0598892	0.934	0.9695	'MM'
VA03	DD02	0.043373	0.0538091	0.0926662	0.063368	0.0598892	0.926	0.9695	'MM'
DD02	VB05	0.0217878	0.0520709	0.098059	0.063368	0.0598892	0.8	0.9695	'MM'
AVBR	DD02	0.0586697	0.0693429	0.112121	0.0746019	0.0689681	0.954	0.9635	'MI'
DD02	PDER	0.027549	0.072018	0.0922401	0.0624024	0.0597127	0.85	0.9685	'MS'
RMDR	DD02	0.0645287	0.062278	0.0914789	0.0680999	0.0653113	0.9565	0.966	'MM'
DD02	ALML	0.0443508	0.0547189	0.0958332	0.0663845	0.0629057	0.9395	0.967	'MS'
ADLL	DD02	0.0440616	0.0550826	0.0958332	0.0663845	0.0629057	0.9285	0.967	'MS'
OLQDL	DD02	0.0509873	0.0550826	0.0958332	0.0663845	0.0629057	0.9455	0.967	'MS'
AIBR	DD02	0.0440616	0.0550826	0.0914789	0.0663845	0.0629057	0.9195	0.9625	'MI'
DD02	ALMR	0.0485266	0.0547189	0.0954414	0.0616957	0.0589071	0.9395	0.9675	'MS'
DD02	ALNL	0.0488243	0.0550826	0.0958332	0.0616957	0.0589071	0.9405	0.9675	'MS'
CEPDL	DD02	0.0397349	0.0550826	0.101338	0.0616957	0.0589071	0.9135	0.961	'MS'
AVKR	DD02	0.0563564	0.0550826	0.0987383	0.0616957	0.0589071	0.9485	0.961	'MI'
RIGR	DD02	0.0515508	0.062278	0.0987383	0.0616957	0.0589071	0.938	0.961	'MI'
RMFR	DD02	0.0446134	0.0550826	0.0987383	0.0616957	0.0589071	0.93	0.961	'MM'
ASEL	DD02	0.0482725	0.0550826	0.0958332	0.0616957	0.0589071	0.94	0.961	'MS'
AWAL	DD02	0.0440616	0.0550826	0.0958332	0.0616957	0.0589071	0.928	0.961	'MS'
AWCL	DD02	0.0391832	0.0550826	0.0958332	0.0616957	0.0589071	0.9115	0.9675	'MS'
IL2DL	DD02	0.0397349	0.0550826	0.0958332	0.0616957	0.0589071	0.9245	0.9675	'MS'
IL2L	DD02	0.0446134	0.0550826	0.0958332	0.0616957	0.0589071	0.9315	0.961	'MS'
IL2R	DD02	0.0446134	0.0550826	0.0958332	0.0616957	0.0589071	0.94	0.9675	'MS'
OLQVL	DD02	0.0446134	0.0550826	0.0958332	0.0616957	0.0589071	0.94	0.961	'MS'
SMBVR	DD02	0.0488243	0.0550826	0.0958332	0.0616957	0.0589071	0.951	0.961	'MM'
URBL	DD02	0.0446134	0.0550826	0.0958332	0.0616957	0.0589071	0.93	0.961	'MS'
IL1L	DD02	0.0446134	0.0550826	0.0958332	0.0616957	0.0589071	0.94	0.9675	'MS'
IL2DR	DD02	0.0488243	0.0550826	0.0958332	0.0616957	0.0589071	0.951	0.961	'MS'
URYVL	DD02	0.0446134	0.0550826	0.0958332	0.0616957	0.0589071	0.94	0.961	'MS'
SMBVL	DD02	0.0646191	0.0550826	0.0958332	0.0616957	0.0589071	0.977	0.9675	'MM'
SMBDR	DD02	0.0446134	0.0550826	0.0931156	0.0616957	0.0589071	0.9195	0.961	'MM'
AIYL	DD02	0.0440616	0.0550826	0.0885665	0.0616957	0.0589071	0.9285	0.9675	'MI'
DD02	DD06	0.0507207	0.0632971	0.0977701	0.0616957	0.0589071	0.937	0.956	'MM'
DA02	DD02	0.0490353	0.0639535	0.0894832	0.0623228	0.0588201	0.9275	0.968	'MM'
DD02	VD09	0.0479259	0.0547189	0.0954414	0.0615288	0.058814	0.933	0.967	'MM'
SIBVL	DD02	0.0361397	0.0550826	0.0958332	0.0653712	0.0618684	0.85	0.9655	'MI'
RIMR	DD02	0.051249	0.0623546	0.101338	0.0683026	0.0648722	0.9465	0.969	'MM'
SAAVL	DD02	0.0604604	0.0550826	0.0958332	0.0653712	0.0618684	0.972	0.9715	'MI'
AVAL	AVAR	0.0695441	0.0533292	0.0892306	0.0610325	0.0610448	0.966	0.965	'II'
DD02	DD05	0.0562634	0.0547189	0.0978644	0.0606221	0.0578825	0.937	0.966	'MM'
DD02	PVCL	0.0560653	0.0678995	0.0954414	0.0606221	0.0578825	0.952	0.966	'MI'
RIAR	VA09	0.0198374	0.00812384	0.0274949	0.0452597	0.0438961	0.8	0.9815	'MI'
RIAR	VD09	0.0179126	0.0153576	0.0154354	0.0479355	0.0438961	0.8	0.9845	'MI'
DA01	DD02	0.0528983	0.0641326	0.0720089	0.0612378	0.0577114	0.925	0.967	'MM'
URADR	DD02	0.0446134	0.0550826	0.0958332	0.0673612	0.0639065	0.93	0.964	'MS'
AVHL	DD02	0.0440616	0.0547189	0.0954414	0.0673612	0.0639065	0.928	0.968	'MI'
RIFL	DD02	0.043373	0.0538091	0.0906305	0.064375	0.0609203	0.9265	0.961	'MI'
AVAR	DD02	0.0529238	0.0440738	0.086489	0.0767447	0.0728818	0.935	0.9515	'MI'
ASKR	DD02	0.054236	0.0550826	0.0958332	0.0616957	0.0589071	0.9535	0.961	'MS'
DD02	AVM	0.0485266	0.0619107	0.0954414	0.0596813	0.0569171	0.9395	0.965	'MS'
DD02	DB04	0.0418194	0.0520709	0.0927564	0.0596813	0.0569171	0.921	0.965	'MM'
BDUR	DD02	0.0485266	0.060799	0.10911	0.0596813	0.0569171	0.9505	0.965	'MI'
AVDL	DD02	0.0443508	0.0546883	0.0954414	0.0596813	0.0569171	0.9395	0.955	'MI'
DD02	PVCR	0.0485266	0.0673279	0.0786516	0.0596813	0.0569171	0.9405	0.965	'MI'
DD02	PVNL	0.0544869	0.0673341	0.107885	0.0596813	0.0569171	0.9625	0.9545	'MI'
DD02	PVNR	0.0509658	0.0632971	0.109049	0.0596813	0.0569171	0.956	0.965	'MI'
DD02	VA11	0.0527605	0.0547189	0.0978644	0.0596813	0.0569171	0.9505	0.965	'MM'
DD02	VC05	0.0435744	0.0520709	0.0838968	0.0596813	0.0569171	0.927	0.9585	'MM'
DD02	PVPL	0.0564163	0.052459	0.0946125	0.0662802	0.0628744	0.9405	0.955	'MI'
RMDL	DD02	0.0757532	0.062278	0.0914789	0.0626429	0.0598787	0.9815	0.9545	'MM'
RMEV	DD02	0.0603481	0.062278	0.0914789	0.0626429	0.0598787	0.9525	0.9535	'MM'
VD01	VD09	0.0481774	0.0518731	0.0139944	0.0433954	0.0420232	0.931	0.991	'MM'
RMDVL	DD02	0.0622951	0.0558306	0.0921767	0.0724477	0.0712871	0.967	0.948	'MM'
VB01	DD02	0.043373	0.0538091	0.0928991	0.0587051	0.0559165	0.918	0.9635	'MM'
RIS	DD02	0.0446134	0.0550826	0.0958332	0.0663845	0.0629057	0.94	0.9625	'MI'
RMEL	DD02	0.0446134	0.0550826	0.101136	0.0616957	0.0589071	0.94	0.9675	'MM'
RIML	DD02	0.0463623	0.0550826	0.0987383	0.0616957	0.0589071	0.945	0.9675	'MM'
IL2VL	DD02	0.0512407	0.0550826	0.0958332	0.0616957	0.0589071	0.9565	0.961	'MS'
RMDDL	PDER	0.00647018	0.0290225	0.00816256	0.0437181	0.0390625	0.25	0.9795	'MS'
RMDDL	VD09	0.0117338	0.00812384	0.00816256	0.0483868	0.0390625	0.45	0.985	'MM'
AVFL	DD02	0.0504264	0.0619107	0.0881774	0.0623618	0.0589071	0.9385	0.957	'MI'
AVAR	DA02	0.0294651	0.0133602	0.0301926	0.0383384	0.048022	0.85	0.9535	'MI'
AVAR	AVL	0.0185434	0.0133602	0.0757346	0.0413039	0.0480164	0.8	0.951	'MI'
RMHR	DD02	0.0386183	0.0550826	0.0987383	0.0616957	0.0589071	0.92	0.961	'MM'
RMER	DD02	0.0512407	0.0550826	0.0987383	0.0616957	0.0589071	0.9565	0.958	'MM'
ADFL	DD02	0.051249	0.0550826	0.0958332	0.0616957	0.0589071	0.9465	0.961	'MS'
AFDL	DD02	0.0440616	0.0550826	0.0958332	0.0616957	0.0589071	0.928	0.961	'MS'
AINL	DD02	0.0440616	0.0550826	0.0958332	0.0616957	0.0589071	0.928	0.961	'MI'
AIYR	DD02	0.0558047	0.0550826	0.0958332	0.0616957	0.0589071	0.933	0.961	'MI'
ASER	DD02	0.0555252	0.0550826	0.0958332	0.0616957	0.0589071	0.9435	0.9675	'MS'
ASIL	DD02	0.0440616	0.0550826	0.0958332	0.0616957	0.0589071	0.9285	0.961	'MS'
ASIR	DD02	0.0482725	0.0550826	0.0958332	0.0616957	0.0589071	0.94	0.961	'MS'
AWAR	DD02	0.0440616	0.0550826	0.0958332	0.0616957	0.0589071	0.9285	0.9675	'MS'
AWCR	DD02	0.0440616	0.0550826	0.0958332	0.0616957	0.0589071	0.927	0.961	'MS'
IL1DL	DD02	0.0446134	0.0550826	0.0958332	0.0616957	0.0589071	0.93	0.961	'MS'
IL1VL	DD02	0.0547878	0.0550826	0.0958332	0.0616957	0.0589071	0.963	0.961	'MS'
RIVR	DD02	0.0515508	0.0550826	0.0958332	0.0616957	0.0589071	0.9305	0.961	'MM'
SIAVR	DD02	0.0551684	0.0550826	0.0958332	0.0616957	0.0589071	0.964	0.961	'MI'
URAVL	DD02	0.0488243	0.0550826	0.0958332	0.0616957	0.0589071	0.951	0.961	'MS'
URYDL	DD02	0.0512407	0.0550826	0.0958332	0.0616957	0.0589071	0.9375	0.961	'MS'
URYVR	DD02	0.0512407	0.0550826	0.0958332	0.0616957	0.0589071	0.9565	0.9675	'MS'
OLLL	DD02	0.0446134	0.0550826	0.0958332	0.0616957	0.0589071	0.93	0.961	'MS'
RIPL	DD02	0.0397349	0.0550826	0.0958332	0.0616957	0.0589071	0.9135	0.961	'MI'
URYDR	DD02	0.0446134	0.0550826	0.0958332	0.0616957	0.0589071	0.93	0.961	'MS'
BAGL	DD02	0.0512407	0.0550826	0.0958332	0.0616957	0.0589071	0.9475	0.961	'MS'
RICL	DD02	0.0446134	0.0550826	0.0958332	0.0616957	0.0589071	0.93	0.961	'MI'
SMBDL	DD02	0.0446134	0.0550826	0.0958332	0.0616957	0.0589071	0.93	0.961	'MM'
AFDR	DD02	0.045548	0.0550826	0.0931156	0.0616957	0.0589071	0.932	0.9675	'MS'
RMED	DD02	0.0530767	0.0550826	0.0924407	0.0616957	0.0589071	0.9515	0.956	'MM'
DD02	PVQL	0.0440616	0.0550826	0.0958332	0.0616957	0.0589071	0.928	0.9565	'MI'
RIBL	DD02	0.0612379	0.0727103	0.104236	0.0673612	0.0639065	0.9485	0.955	'MI'
DD02	DVC	0.0566804	0.0723978	0.0849689	0.0671808	0.0637999	0.9545	0.955	'MI'
AVAR	DD01	0.0451804	0.0277134	0.0360478	0.0434134	0.0510281	0.948	0.9555	'MI'
SMDVL	DD02	0.0446134	0.0550826	0.0924407	0.0673612	0.0639065	0.9195	0.9565	'MM'
RMFL	DD02	0.0446134	0.0550826	0.0987383	0.0607131	0.0579004	0.9195	0.9595	'MM'
RICR	DD02	0.0488243	0.0550826	0.0958332	0.0607131	0.0579004	0.951	0.9595	'MI'
AVDR	DD02	0.0506879	0.0547189	0.0905932	0.0606221	0.0578825	0.946	0.956	'MI'
RMDDR	VA09	0.0313309	0.00812384	0.0274949	0.0452597	0.0438961	0.9415	0.9815	'MM'
RMDDR	VD09	0.0249032	0.00812384	0.0154354	0.0452597	0.0438961	0.907	0.9815	'MM'
RIAR	PDER	0.012649	0.0290225	0.0209406	0.0409045	0.0400104	0.55	0.9745	'SI'
AIAL	DD02	0.0618716	0.062278	0.0958332	0.0616957	0.0589071	0.9475	0.9575	'MI'
RMDDL	VD03	0.0160266	0.0190635	0.0626331	0.0442011	0.0434106	0.75	0.9545	'MM'
AVJL	DD02	0.0458422	0.0725905	0.10176	0.0596813	0.0569171	0.9335	0.953	'MI'
VA02	DD02	0.0513526	0.0699733	0.095056	0.0623228	0.0588201	0.924	0.962	'MM'
AVAR	AIAR	0.0626867	0.0405006	0.0918287	0.0411724	0.0491618	0.9875	0.95	'II'
DD02	DD04	0.0949846	0.0605343	0.0895596	0.0622529	0.0567886	0.964	0.953	'MM'
VD09	VD10	0.0211476	0.00601571	0.0126374	0.0343645	0.0296834	0.8	0.995	'MM'
SMDDR	DD02	0.106815	0.062278	0.0959878	0.0616957	0.0589071	0.9575	0.956	'MM'
SMDDL	DD02	0.0551684	0.062278	0.0914789	0.0616957	0.0589071	0.9555	0.956	'MM'
AVAR	AVKL	0.0472827	0.0145538	0.0784408	0.040209	0.0448166	0.9755	0.948	'II'
AVAR	AWBR	0.0312973	0.0145538	0.0839054	0.040209	0.0448166	0.9265	0.9585	'SI'
VD09	DVC	0.0364328	0.0172502	0.0469044	0.0390413	0.0381387	0.9615	0.986	'MI'
VD01	PDER	0.0447346	0.0553327	0.0139944	0.0390413	0.0381387	0.9285	0.986	'MS'
VD09	PVPR	0.0262766	0.00712585	0.0140009	0.0390413	0.0381387	0.85	0.986	'MI'
VD01	VA09	0.0481774	0.0401191	0.0205288	0.0390413	0.0381387	0.927	0.986	'MM'
AVAR	SMBDR	0.0187853	0.0145538	0.0839054	0.037764	0.0445086	0.8	0.941	'MI'
AVAR	SMBVR	0.0207944	0.0145538	0.0839054	0.037764	0.0445086	0.85	0.941	'MI'
RMDDL	AVBL	0.0267357	0.0142149	0.0154354	0.0386159	0.0390625	0.9125	0.95	'MI'
RMDVL	VD09	0.0308461	0.00812384	0.00816256	0.0452597	0.0438961	0.9465	0.9715	'MM'
VD01	DD05	0.0530751	0.0401191	0.0205288	0.0303781	0.0377888	0.927	0.969	'MM'
RIR	DD02	0.0446134	0.0550826	0.0958332	0.0616957	0.0589071	0.94	0.9565	'MI'
RIGL	DD02	0.0515508	0.0623546	0.0996853	0.0616957	0.0589071	0.9285	0.9475	'MI'
RMHL	DD02	0.0446134	0.0550826	0.0958332	0.0616957	0.0589071	0.93	0.952	'MM'
AVAR	SAADR	0.0364104	0.0145538	0.0839054	0.037764	0.0439478	0.923	0.952	'II'
RMDDL	AVL	0.0118712	0.0133388	0.00816256	0.0328465	0.0343918	0.45	0.9425	'MM'
RMDDL	PVNL	0.0144353	0.0256197	0.0154354	0.0328465	0.0343918	0.75	0.9355	'MI'
RMDDL	VA09	0.0251603	0.00812384	0.0147317	0.0328465	0.0343918	0.9235	0.9555	'MM'
DD02	PVQR	0.0733311	0.0486572	0.0894033	0.0552201	0.0542206	0.98	0.951	'MI'
RMDDL	VC03	0.0224716	0.023508	0.0215894	0.0437181	0.0434106	0.85	0.9485	'MM'
RIAR	VD03	0.0188202	0.0199317	0.063179	0.0469772	0.0434106	0.8	0.96	'MI'
AVAR	DA09	0.029747	0.0124502	0.0788957	0.0362238	0.0433653	0.9365	0.948	'MI'
SMDVR	DD02	0.0397349	0.062278	0.0914789	0.0626429	0.0598787	0.9135	0.9485	'MM'
AIAR	VD02	0.0989524	0.0982557	0.0656252	0.0332075	0.0400356	0.9945	0.964	'MI'
AVAR	VA01	0.0315657	0.0133602	0.0356889	0.0383384	0.0429464	0.9165	0.9535	'MI'
AVAR	VA03	0.0353534	0.0133602	0.0762211	0.0378806	0.0429464	0.945	0.9525	'MI'
AVAR	VD07	0.0356114	0.0135603	0.0325397	0.0362238	0.0429464	0.9335	0.948	'MI'
AVAR	ASKR	0.0251473	0.0217862	0.0843161	0.040958	0.0448166	0.85	0.9495	'SI'
ASKL	AVAR	0.0141819	0.0145538	0.0839054	0.0380893	0.0448166	0.7	0.953	'SI'
RMDDR	DD05	0.0331977	0.00812384	0.0691402	0.0409045	0.0400104	0.925	0.9745	'MM'
RMDDR	PDER	0.012649	0.0256984	0.0154383	0.0409045	0.0400104	0.55	0.9745	'MS'
AVAR	AQR	0.0234569	0.0124502	0.0762933	0.0358942	0.0426387	0.85	0.947	'SI'
AVAR	DA03	0.0356114	0.0135603	0.0773534	0.0358942	0.0426387	0.947	0.947	'MI'
AVAR	PVNR	0.0280038	0.0124502	0.0817546	0.0358942	0.0426387	0.9255	0.947	'II'
AVAR	SABD	0.0315657	0.0133602	0.0769227	0.0358942	0.0426387	0.9165	0.947	'II'
AVAR	VA05	0.0310645	0.0135603	0.0773534	0.0358942	0.0426387	0.926	0.947	'MI'
AVAR	VB04	0.0294192	0.0135603	0.0773534	0.0358942	0.0426387	0.916	0.947	'MI'
AVAR	VB05	0.02493	0.0135603	0.0773534	0.0358942	0.0426387	0.85	0.947	'MI'
AVAR	VB09	0.017194	0.0124502	0.0817546	0.0358942	0.0426387	0.75	0.9355	'MI'
SMDVR	VD09	0.0179126	0.00812384	0.00816256	0.0362265	0.0359103	0.8	0.982	'MM'
AVAR	PVCL	0.0236742	0.0124502	0.0288327	0.0325963	0.0424378	0.85	0.936	'II'
AVAR	VD06	0.0455175	0.0197818	0.0403678	0.0325963	0.0424378	0.942	0.936	'MI'
AVAL	AIAR	0.0638995	0.0505178	0.105477	0.0364291	0.0401501	0.9655	0.967	'II'
AVAR	VB08	0.0241377	0.0124502	0.0817546	0.0396483	0.0420826	0.85	0.957	'MI'
AVAR	VC01	0.0353534	0.0133602	0.0823918	0.0358942	0.0420826	0.946	0.947	'MI'
RMDVR	DD04	0.043058	0.0535534	0.0341347	0.0344661	0.0390732	0.85	0.96	'MM'
OLQDR	RMDDL	0.0124631	0.00669032	0.00670825	0.0311681	0.0327221	0.45	0.9355	'MS'
RIAR	RMDDL	0.0124631	0.0139273	0.0194921	0.0420417	0.0417428	0.5	0.931	'MI'
AVAL	VD03	0.057383	0.0310655	0.0828022	0.0472572	0.0429464	0.9465	0.9705	'MI'
AVAL	VD02	0.0760033	0.0439588	0.0441267	0.0362238	0.0453992	0.961	0.941	'MI'
RMDDL	PVPL	0.0326447	0.0143809	0.0154354	0.0386159	0.0390625	0.9465	0.9375	'MI'
DD02	PVPR	0.0217878	0.0283863	0.0726408	0.0606221	0.0578825	0.8	0.945	'MI'
AVAR	ASJL	0.0358442	0.0145538	0.0839054	0.037764	0.0445086	0.9625	0.941	'SI'
OLQVR	AVAR	0.0300932	0.0145538	0.0839054	0.037764	0.0445086	0.92	0.952	'SI'
AVAR	PVQR	0.0437247	0.0145538	0.0784408	0.037764	0.0445086	0.9715	0.941	'II'
AVAR	SIBVL	0.0257228	0.0217862	0.0843161	0.037764	0.0445086	0.85	0.941	'II'
RID	AVER	0.0257608	0.0145538	0.0220001	0.0269576	0.036799	0.85	0.9515	'MI'
AVBL	VC03	0.0345885	0.0293095	0.0260346	0.0390413	0.0381387	0.9	0.967	'MI'
RMDR	RMDDL	0.0177596	0.00669032	0.013984	0.0369384	0.0373937	0.8	0.9485	'MM'
VD09	DVA	0.0263126	0.00601571	0.0198937	0.024941	0.0250044	0.85	0.995	'MI'
RIAL	AVL	0.0340359	0.0205727	0.0154354	0.0311149	0.031553	0.9165	0.936	'MI'
RIAL	PDER	0.0347949	0.0290225	0.0209406	0.0394908	0.031553	0.9205	0.972	'SI'
RIAL	VA09	0.0419833	0.00812384	0.0274949	0.0311149	0.031553	0.933	0.9495	'MI'
RIAL	VD09	0.0338894	0.00812384	0.0154354	0.0409045	0.031553	0.9055	0.9745	'MI'
SAAVL	AVAR	0.0364104	0.0145538	0.0839054	0.037764	0.0445086	0.9645	0.952	'II'
AVAR	PVQL	0.0251473	0.0145538	0.0784408	0.037764	0.0445086	0.85	0.9335	'II'
PDER	PVPR	0.00567124	0.0282934	0.00744529	0.0343645	0.0340398	0.2	0.9785	'SI'
DD05	PVPR	0.0262766	0.00712585	0.00744529	0.0343645	0.0340398	0.85	0.9785	'MI'
VB01	VD01	0.0490103	0.0510587	0.0118065	0.0343645	0.0340398	0.9315	0.9785	'MM'
RMDVL	PDER	0.012649	0.0290225	0.00816256	0.0409045	0.0400104	0.55	0.963	'MS'
RMDDL	DD06	0.0141871	0.0201493	0.0154354	0.0297754	0.0313293	0.7	0.9195	'MM'
AVAR	VD05	0.02493	0.0135603	0.0338946	0.0325963	0.0424378	0.85	0.936	'MI'
AVAR	BDUL	0.0343107	0.0124502	0.0762933	0.037764	0.0439478	0.9575	0.941	'II'
AVAR	PVR	0.0343107	0.0124502	0.0778197	0.037764	0.0439478	0.9405	0.952	'SI'
AVAR	ADAR	0.0141819	0.0145538	0.0839054	0.037764	0.0401501	0.7	0.952	'II'
AVAR	ADLR	0.0250112	0.0145538	0.0784408	0.037764	0.0401501	0.85	0.941	'SI'
AVAR	AINR	0.0295414	0.0145538	0.0784408	0.037764	0.0401501	0.935	0.941	'II'
AVAR	AIYL	0.0251473	0.0145538	0.0839054	0.037764	0.0401501	0.85	0.952	'II'
AVAR	AIZL	0.0295414	0.0145538	0.0839054	0.037764	0.0401501	0.9	0.952	'II'
AVAR	ALNL	0.0325599	0.0145538	0.0839054	0.037764	0.0401501	0.931	0.952	'SI'
AVAR	ASEL	0.0358442	0.0145538	0.0839054	0.037764	0.0401501	0.947	0.941	'SI'
AVAR	ASJR	0.0296427	0.0217862	0.0881043	0.037764	0.0401501	0.9165	0.941	'SI'
IL1L	AVAR	0.0273376	0.0145538	0.0839054	0.037764	0.0401501	0.921	0.952	'SI'
IL2DR	AVAR	0.0300932	0.0145538	0.0839054	0.037764	0.0401501	0.938	0.941	'SI'
IL2L	AVAR	0.0300932	0.0145538	0.0839054	0.037764	0.0401501	0.922	0.941	'SI'
SAAVR	AVAR	0.0458279	0.0145538	0.0839054	0.0380893	0.0401501	0.9615	0.942	'II'
URBL	AVAR	0.0257228	0.0145538	0.0839054	0.037764	0.0401501	0.85	0.941	'SI'
URXL	AVAR	0.029957	0.0145538	0.0839054	0.037764	0.0401501	0.9375	0.952	'SI'
URYVL	AVAR	0.0364104	0.0145538	0.0839054	0.037764	0.0401501	0.9645	0.941	'SI'
OLQDR	AVAR	0.0187853	0.0145538	0.0839054	0.0380893	0.0401501	0.8	0.942	'SI'
CEPDL	AVAR	0.0187853	0.0145538	0.0839054	0.037764	0.0401501	0.8	0.941	'SI'
IL2DL	AVAR	0.0257228	0.0145538	0.0784408	0.037764	0.0401501	0.909	0.952	'SI'
IL2R	AVAR	0.0235427	0.0145538	0.0784408	0.037764	0.0401501	0.85	0.952	'SI'
OLQVL	AVAR	0.0364104	0.0145538	0.0784408	0.037764	0.0401501	0.9645	0.941	'SI'
URAVR	AVAR	0.0257228	0.0145538	0.0784408	0.037764	0.0401501	0.909	0.941	'SI'
IL2VR	AVAR	0.0300932	0.0145538	0.0779595	0.037764	0.0401501	0.938	0.941	'SI'
AVAR	AVKR	0.0326057	0.0145538	0.0839054	0.037764	0.0401501	0.916	0.941	'II'
AVAR	AWAL	0.0336526	0.0145538	0.0784408	0.037764	0.0401501	0.9375	0.941	'SI'
AVAR	AWCL	0.0286913	0.0145538	0.0839054	0.037764	0.0401501	0.911	0.952	'SI'
AVAR	HSNL	0.0312973	0.0124502	0.0784408	0.037764	0.0401501	0.9445	0.941	'MI'
AVAR	PLNR	0.0300932	0.0145538	0.0839054	0.037764	0.0401501	0.9175	0.952	'SI'
AVAR	RIGR	0.0300932	0.0145538	0.0839054	0.0344661	0.0401501	0.9	0.931	'II'
AVAR	RMFR	0.0207944	0.0145538	0.0784408	0.037764	0.0401501	0.8	0.941	'MI'
AVAR	RMGL	0.0344342	0.0145538	0.0839054	0.037764	0.0401501	0.958	0.9415	'MI'
AVAR	SAADL	0.0193225	0.0145538	0.0839054	0.037764	0.0401501	0.8	0.941	'II'
AVAR	SDQR	0.0187853	0.0145538	0.0784408	0.037764	0.0401501	0.8	0.941	'II'
AVAR	SIADR	0.0257228	0.0145538	0.0839054	0.037764	0.0401501	0.909	0.941	'II'
AVAR	SIAVL	0.0362385	0.0145538	0.0839054	0.037764	0.0401501	0.947	0.941	'II'
AVAR	SMBVL	0.0325599	0.0145538	0.0784408	0.037764	0.0401501	0.9505	0.952	'MI'
VD02	DD04	0.102527	0.086319	0.0387762	0.0304766	0.0372039	0.9765	0.935	'MM'
AVBR	DD04	0.0447783	0.0725911	0.036321	0.0367313	0.0371922	0.91	0.9545	'MI'
AVBL	AVBR	0.0180765	0.0408909	0.0254297	0.0367542	0.0371922	0.75	0.962	'II'
RIAL	VC03	0.0508757	0.023508	0.0319307	0.0409045	0.0400104	0.9435	0.9415	'MI'
AVAL	DD01	0.0624358	0.0340489	0.0380888	0.036897	0.0382766	0.9535	0.968	'MI'
AVAL	DD04	0.0742588	0.0482664	0.0431185	0.036897	0.0382766	0.9425	0.9515	'MI'
RIAL	RMDDL	0.03459	0.0139273	0.0194921	0.0369384	0.0373937	0.9315	0.916	'MI'
RMDL	AVBL	0.0414365	0.0142149	0.0147255	0.0311149	0.031553	0.962	0.959	'MI'
RMEV	AVBL	0.035899	0.0206714	0.00816256	0.0311149	0.031553	0.9225	0.9565	'MI'
RMDDL	AVJL	0.00780798	0.0201493	0.0209406	0.0328465	0.0343918	0.3	0.932	'MI'
RMDDL	AVJR	0.0141871	0.00812384	0.0154354	0.0386159	0.0390625	0.7	0.9375	'MI'
AVAR	VA12	0.0284286	0.0124502	0.0817546	0.0304766	0.039652	0.9285	0.9275	'MI'
AVAR	VB02	0.0401349	0.0133602	0.0823918	0.0304766	0.039652	0.946	0.9275	'MI'
SMDVL	AVAR	0.0370737	0.0145538	0.0777347	0.04383	0.0490292	0.9365	0.9385	'MI'
AVER	DD04	0.074675	0.0652849	0.034194	0.0322522	0.0390732	0.9525	0.936	'MI'
AVAR	AVBL	0.0296498	0.0186994	0.0755917	0.0378806	0.0433653	0.85	0.933	'II'
AVEL	AIAR	0.0807999	0.0440744	0.032882	0.0365024	0.0374034	0.9975	0.965	'II'
AVER	AIAR	0.0813162	0.04648	0.032882	0.0347482	0.0383657	0.99	0.9625	'II'
VD02	DA02	0.0354996	0.0504744	0.0303841	0.0250886	0.0325287	0.85	0.9505	'MM'
VB02	VD02	0.033366	0.0452015	0.0459772	0.0304766	0.0325287	0.85	0.9705	'MM'
PVPR	DVA	0.0350023	0.0143673	0.021991	0.0309858	0.0325225	0.919	0.9705	'II'
AVAR	DD04	0.0663887	0.0456614	0.0453997	0.0383384	0.0429464	0.9515	0.9285	'MI'
RMDDL	PVPR	0.00726252	0.00746157	0.00776017	0.0386159	0.0390625	0.3	0.935	'MI'
RMDL	AVL	0.0241425	0.0133388	0.00816256	0.0253363	0.026873	0.9195	0.9505	'MM'
RMEV	PVNL	0.0235427	0.0320362	0.0154354	0.0253115	0.026873	0.85	0.9365	'MI'
RMDL	VA09	0.0331977	0.00812384	0.0147317	0.0253363	0.026873	0.95	0.97	'MM'
VD09	PVPL	0.0239611	0.012265	0.00607563	0.0329507	0.0296834	0.85	0.979	'MI'
VD03	VD04	0.0199805	0.0178781	0.0603422	0.0292539	0.0296834	0.8	0.958	'MM'
VD02	VC01	0.0337587	0.0486485	0.0359098	0.0229639	0.0321393	0.9075	0.939	'MM'
VA01	VD02	0.0721929	0.0638859	0.0427111	0.0229639	0.0321393	0.9835	0.939	'MM'
SABVL	VD02	0.0292374	0.0570705	0.0252849	0.0229639	0.0321393	0.85	0.939	'MI'
RMDL	VC03	0.0583472	0.023508	0.0215894	0.0362265	0.0359103	0.9855	0.955	'MM'
RMEV	VC03	0.033895	0.0299645	0.0215894	0.0362265	0.0359103	0.9085	0.953	'MM'
DD01	VA03	0.0231492	0.028812	0.0183342	0.0185415	0.0266383	0.85	0.9685	'MM'
VD03	DD02	0.0566181	0.0667141	0.1007	0.0555506	0.0526903	0.942	0.94	'MM'
AVAL	AVER	0.0472519	0.0280356	0.0843161	0.0469086	0.0448166	0.9085	0.9625	'II'
RMDDL	AIBL	0.0138836	0.0139273	0.00670825	0.0311681	0.0327221	0.7	0.9365	'MI'
RMDDL	RIML	0.00629055	0.00669032	0.00670825	0.0311681	0.0327221	0.25	0.95	'MM'
AVAL	VA11	0.0406052	0.0186994	0.0772135	0.0287197	0.0331826	0.9205	0.9585	'MI'
AVAL	VD06	0.0420964	0.0279829	0.035717	0.0318116	0.0331826	0.85	0.9685	'MI'
AVAL	SMBVR	0.0269239	0.0208108	0.081542	0.0269547	0.0330941	0.85	0.934	'MI'
AVKL	VD03	0.0188202	0.0226597	0.0569927	0.0264926	0.0292897	0.8	0.946	'MI'
RMDDL	AS01	0.00706115	0.00728914	0.00776017	0.0328465	0.0292876	0.25	0.9555	'MM'
RMDDL	AVDL	0.0139868	0.00812384	0.00816256	0.0314495	0.0292876	0.7	0.931	'MI'
RMDDL	AVG	0.00780798	0.00812384	0.00816256	0.0314495	0.0292876	0.3	0.9375	'MS'
RMDDL	DA03	0.0126424	0.00746157	0.0150404	0.0287115	0.0292876	0.5	0.94	'MM'
RMDDL	HSNR	0.00750973	0.0153576	0.00816256	0.0314495	0.0292876	0.3	0.9375	'MM'
RMDDL	PHAL	0.0144353	0.00812384	0.00816256	0.0314495	0.0292876	0.75	0.9505	'MS'
RMDDL	PHAR	0.00780798	0.00812384	0.00816256	0.0314495	0.0292876	0.3	0.9505	'MS'
RMDDL	PVCL	0.00780798	0.0153576	0.0154354	0.0328465	0.0292876	0.3	0.9555	'MI'
RMDDL	RIFR	0.00750973	0.00812384	0.00816256	0.0314495	0.0292876	0.3	0.9505	'MI'
RMDDL	SABVL	0.0185425	0.00728914	0.00816256	0.0287115	0.0292876	0.85	0.94	'MI'
RMDDL	VA08	0.0126424	0.00746157	0.00776017	0.0285082	0.0292876	0.55	0.925	'MM'
RMDDL	VB01	0.0190592	0.00728914	0.00776017	0.0314495	0.0292876	0.85	0.9505	'MM'
RMDDL	VC04	0.0138899	0.0136907	0.00776017	0.0314495	0.0292876	0.7	0.9375	'MM'
RMDDL	VC05	0.00726252	0.00746157	0.00816256	0.0314495	0.0292876	0.3	0.9375	'MM'
RMDDL	VD04	0.0308166	0.0394242	0.0143165	0.0253115	0.0292876	0.9285	0.909	'MM'
RMDDL	VD11	0.0144353	0.00812384	0.00816256	0.0314495	0.0292876	0.75	0.9505	'MM'
RIAL	PVPL	0.0439016	0.0216069	0.0154354	0.0362265	0.0359103	0.928	0.9305	'II'
AIAR	VA02	0.0860469	0.0528089	0.0298487	0.0231662	0.0315642	0.9945	0.9655	'MI'
RIAL	RIAR	0.03459	0.024196	0.0194921	0.0392284	0.0383429	0.9175	0.923	'II'
AVAR	ADAL	0.0234569	0.0124502	0.0762933	0.0358942	0.0382805	0.85	0.947	'II'
AVAR	AS01	0.0290362	0.0133602	0.0356889	0.0362238	0.0382805	0.915	0.948	'MI'
AVAR	AS02	0.0283041	0.0133602	0.0823918	0.0358942	0.0382805	0.91	0.947	'MI'
AVAR	AS03	0.0308631	0.0133602	0.0823918	0.0358942	0.0382805	0.925	0.947	'MI'
AVAR	AS04	0.0354519	0.0135603	0.0828225	0.0358942	0.0382805	0.9465	0.947	'MI'
AVAR	AS05	0.02493	0.0135603	0.0356889	0.0358942	0.0382805	0.85	0.947	'MI'
AVAR	AS06	0.0296665	0.0135603	0.0356889	0.0358942	0.0382805	0.9175	0.947	'MI'
AVAR	AS07	0.0280038	0.0124502	0.0755917	0.0304766	0.0382805	0.9255	0.9275	'MI'
AVAR	AS08	0.0341873	0.0124502	0.0762933	0.0358942	0.0382805	0.957	0.947	'MI'
AVAR	AS09	0.029747	0.0124502	0.0762933	0.0358942	0.0382805	0.92	0.947	'MI'
AVAR	AS10	0.0236742	0.0124502	0.0817546	0.0358942	0.0382805	0.85	0.947	'MI'
AVAR	AS11	0.0304519	0.0124502	0.0817546	0.0304766	0.0382805	0.94	0.9275	'MI'
ALA	AVAR	0.029747	0.0124502	0.0817546	0.0358942	0.0382805	0.9365	0.947	'II'
RID	AVAR	0.0295822	0.01856	0.0380209	0.0325963	0.0382805	0.9175	0.936	'MI'
AVAR	AVDL	0.0343107	0.0124502	0.0817546	0.0358942	0.0382805	0.9575	0.9305	'II'
AVAR	AVG	0.0272497	0.0124502	0.0762933	0.0358942	0.0382805	0.9	0.9355	'SI'
AVAR	AVHR	0.0182036	0.0124502	0.0762933	0.0346722	0.0382805	0.8	0.943	'II'
AVAR	DA04	0.040058	0.0135603	0.0773534	0.0358942	0.0382805	0.9615	0.947	'MI'
AVAR	DA05	0.0356114	0.0135603	0.0356889	0.0358942	0.0382805	0.9455	0.947	'MI'
AVAR	DA06	0.029747	0.0124502	0.0343215	0.0358942	0.0382805	0.9365	0.947	'MI'
AVAR	DA07	0.0338255	0.0124502	0.0817546	0.0358942	0.0382805	0.9385	0.947	'MI'
AVAR	DA08	0.0253703	0.0124502	0.0762933	0.0304766	0.0382805	0.906	0.9275	'MI'
AVAR	DB01	0.0353534	0.0133602	0.0769227	0.0358942	0.0382805	0.9465	0.947	'MI'
AVAR	DB02	0.0353534	0.0133602	0.0823918	0.0304766	0.0382805	0.9465	0.9275	'MI'
AVAR	DB03	0.0310645	0.0135603	0.0773534	0.0358942	0.0382805	0.926	0.947	'MI'
AVAR	DB04	0.0356114	0.0135603	0.0828225	0.0358942	0.0382805	0.9465	0.947	'MI'
AVAR	DB05	0.0167395	0.0124502	0.0817546	0.0358942	0.0382805	0.75	0.947	'MI'
AVAR	DB06	0.0343107	0.0124502	0.0817546	0.0358942	0.0382805	0.9575	0.947	'MI'
AVAR	DB07	0.021534	0.0124502	0.0755917	0.0358942	0.0382805	0.85	0.947	'MI'
AVAR	DD05	0.033095	0.0124502	0.0817546	0.0416361	0.0382805	0.85	0.9615	'MI'
AVAR	DVB	0.0280038	0.0124502	0.0817546	0.0358942	0.0382805	0.9065	0.947	'MI'
AVAR	FLPR	0.0343107	0.0124502	0.0817546	0.0358942	0.0382805	0.939	0.947	'SI'
AVAR	HSNR	0.0292829	0.0124502	0.0762933	0.0358942	0.0382805	0.9145	0.9355	'MI'
AVAR	LUAL	0.0390858	0.0124502	0.0817546	0.0358942	0.0382805	0.972	0.947	'II'
AVAR	LUAR	0.034572	0.0124502	0.0762933	0.0358942	0.0382805	0.942	0.947	'II'
AVAR	PDA	0.0253353	0.0124502	0.0817546	0.0358942	0.0382805	0.9055	0.947	'MI'
AVAR	PDB	0.0320631	0.0124502	0.0817546	0.0304766	0.0382805	0.948	0.9275	'MI'
AVAR	PDEL	0.0343107	0.0124502	0.0817546	0.0358942	0.0382805	0.943	0.947	'SI'
AVAR	PDER	0.0131423	0.0184859	0.0343215	0.0383384	0.0382805	0.6	0.9535	'SI'
AVAR	PHAL	0.0343107	0.0124502	0.0817546	0.0304766	0.0382805	0.9575	0.9275	'SI'
AVAR	PHAR	0.0338255	0.0124502	0.0817546	0.0304766	0.0382805	0.9555	0.9275	'SI'
AVAR	PHBL	0.0236742	0.0124502	0.0762933	0.0358942	0.0382805	0.85	0.947	'SI'
AVAR	PHBR	0.029747	0.0124502	0.0762933	0.0358942	0.0382805	0.9365	0.947	'SI'
AVAR	PHCL	0.0343107	0.0124502	0.0817546	0.0358942	0.0382805	0.926	0.947	'SI'
AVAR	PHCR	0.0343107	0.0124502	0.0817546	0.0358942	0.0382805	0.941	0.947	'SI'
AVAR	PLML	0.0280038	0.0124502	0.0762933	0.0304766	0.0382805	0.9255	0.9275	'SI'
AVAR	PLMR	0.0235027	0.0124502	0.0762933	0.0358942	0.0382805	0.85	0.947	'SI'
AVAR	PQR	0.0236742	0.0124502	0.0762933	0.0358942	0.0382805	0.85	0.947	'SI'
AVAR	PVDL	0.029747	0.0124502	0.0817546	0.0358942	0.0382805	0.9365	0.947	'II'
AVAR	PVDR	0.0341873	0.0124502	0.0755905	0.0358942	0.0382805	0.9405	0.947	'II'
AVAR	PVM	0.0324071	0.0124502	0.0817546	0.0358942	0.0382805	0.9495	0.947	'SI'
AVAR	PVWL	0.029747	0.0124502	0.0817546	0.0358942	0.0382805	0.9365	0.947	'II'
AVAR	PVWR	0.0236742	0.0124502	0.0817546	0.0358942	0.0382805	0.85	0.947	'II'
AVAR	RIFR	0.026755	0.0124502	0.0817546	0.0358942	0.0382805	0.85	0.947	'II'
AVAR	SABVL	0.0203689	0.0133602	0.0174402	0.0358942	0.0382805	0.8	0.947	'II'
AVAR	SABVR	0.0283041	0.0133602	0.0301944	0.0358942	0.0382805	0.909	0.947	'II'
AVAR	VA04	0.02493	0.0135603	0.0828225	0.0358942	0.0382805	0.85	0.947	'MI'
AVAR	VA06	0.0310645	0.0135603	0.0828225	0.0358942	0.0382805	0.926	0.947	'MI'
AVAR	VA07	0.02493	0.0135603	0.0773534	0.0358942	0.0382805	0.85	0.947	'MI'
AVAR	VA11	0.0343107	0.0124502	0.0817546	0.0304766	0.0382805	0.941	0.9275	'MI'
AVAR	VB01	0.0298082	0.0133602	0.0356889	0.0304766	0.0382805	0.9	0.9275	'MI'
AVAR	VB03	0.0347071	0.0135603	0.0773534	0.0358942	0.0382805	0.9435	0.947	'MI'
AVAR	VB06	0.0310645	0.0135603	0.0356889	0.0358942	0.0382805	0.926	0.947	'MI'
AVAR	VB07	0.0338255	0.0124502	0.0766761	0.0304766	0.0382805	0.9555	0.9275	'MI'
AVAR	VB10	0.0272497	0.0124502	0.0762933	0.0358942	0.0382805	0.9205	0.947	'MI'
AVAR	VB11	0.0236742	0.0124502	0.0762933	0.0358942	0.0382805	0.85	0.947	'MI'
AVAR	VC02	0.0347071	0.0135603	0.0773534	0.0358942	0.0382805	0.9425	0.947	'MI'
AVAR	VC04	0.0292942	0.0135603	0.0773534	0.0358942	0.0382805	0.916	0.9355	'MI'
AVAR	VC05	0.0317671	0.0135603	0.0718616	0.0358942	0.0382805	0.929	0.9355	'MI'
AVAR	VD04	0.0420935	0.0318449	0.0366863	0.0304766	0.0382805	0.935	0.9155	'MI'
AVAR	VD09	0.033095	0.0124502	0.0817546	0.0325963	0.0382805	0.925	0.936	'MI'
AVAR	VD10	0.0400649	0.0196795	0.0857115	0.0358942	0.0382805	0.916	0.947	'MI'
AVAR	VD11	0.0343107	0.0124502	0.0817546	0.0304766	0.0382805	0.9575	0.9275	'MI'
AVAR	VD13	0.029747	0.0124502	0.0755917	0.0304766	0.0382805	0.85	0.9275	'MI'
AVAR	VD12	0.0253353	0.0124502	0.0817546	0.0354392	0.0382766	0.85	0.9455	'MI'
SAADR	VD02	0.0616075	0.0624735	0.0384397	0.0248278	0.0315642	0.9645	0.9495	'MI'
AVKL	VD02	0.0576283	0.0624735	0.0329118	0.0248278	0.0315642	0.972	0.93	'MI'
RMDVR	VD06	0.039296	0.0386952	0.0304709	0.0269576	0.0315642	0.909	0.9745	'MM'
VD01	ALNL	0.0463995	0.0549305	0.0143165	0.0311149	0.031553	0.931	0.971	'MS'
RIAR	AVDL	0.0139868	0.0153576	0.0154354	0.0311149	0.031553	0.7	0.93	'II'
RIAR	AVL	0.012649	0.0205727	0.0154354	0.0311149	0.031553	0.55	0.936	'MI'
RIAR	DD05	0.0331977	0.00812384	0.0629851	0.0385189	0.031553	0.925	0.97	'MI'
VD01	DD06	0.0460981	0.0569446	0.0212644	0.0311149	0.031553	0.9215	0.9445	'MM'
RIAR	FLPR	0.0139868	0.0153576	0.0154354	0.0311149	0.031553	0.7	0.9495	'SI'
VD01	HSNL	0.0461345	0.0545424	0.0143165	0.0311149	0.031553	0.941	0.956	'MM'
RIAR	VC04	0.0134413	0.014703	0.0150404	0.0311149	0.031553	0.65	0.936	'MI'
RIAR	VC05	0.0134413	0.014703	0.0154354	0.0311149	0.031553	0.65	0.936	'MI'
AIZL	VD01	0.0480933	0.0549305	0.0216066	0.0311149	0.031553	0.929	0.971	'MI'
CEPDL	VD01	0.0520624	0.0549305	0.0216066	0.0311149	0.031553	0.946	0.956	'MS'
IL1L	VD01	0.0466889	0.0549305	0.0143165	0.0311149	0.031553	0.9425	0.971	'MS'
IL2DR	VD01	0.0463995	0.0549305	0.0143165	0.0311149	0.031553	0.942	0.956	'MS'
IL2L	VD01	0.0520624	0.0549305	0.0143165	0.0311149	0.031553	0.9475	0.956	'MS'
IL2R	VD01	0.0466889	0.0549305	0.0143165	0.0311149	0.031553	0.9425	0.971	'MS'
SMBDR	VD01	0.0520624	0.0549305	0.0143165	0.0311149	0.031553	0.937	0.956	'MM'
URAVR	VD01	0.0463995	0.0549305	0.0143165	0.0311149	0.031553	0.942	0.956	'MS'
URXL	VD01	0.0463995	0.0549305	0.0143165	0.0311149	0.031553	0.942	0.971	'MS'
SMBVL	VD01	0.0466889	0.0549305	0.0143165	0.0311149	0.031553	0.9425	0.971	'MM'
RIAR	VD10	0.03959	0.0225824	0.0292538	0.0269576	0.031553	0.9355	0.932	'MI'
RMEV	RMDDL	0.0129117	0.0139273	0.013984	0.0311681	0.0327221	0.55	0.918	'MM'
RMDL	RMDDL	0.0129117	0.00669032	0.00670825	0.0311681	0.0327221	0.55	0.92	'MM'
RMDDL	SIBVR	0.0184682	0.00669032	0.00670825	0.0311681	0.0327221	0.85	0.918	'MI'
AVAR	ADEL	0.0364104	0.0145538	0.0784408	0.040958	0.0448166	0.9495	0.943	'SI'
AVAR	RIMR	0.0362478	0.0217862	0.0843161	0.0380893	0.0448166	0.9475	0.942	'MI'
AIBL	AVBL	0.0310835	0.0216069	0.0147255	0.0253115	0.0292876	0.9215	0.959	'II'
AVAR	VC03	0.0505424	0.0296182	0.0787963	0.045385	0.0472748	0.9585	0.9395	'MI'
AVAL	VA02	0.046195	0.0196172	0.0315671	0.0318116	0.0382805	0.9125	0.954	'MI'
CEPDR	AVJR	0.0141871	0.00812384	0.0154354	0.0328465	0.0343918	0.7	0.946	'SI'
CEPVR	AVJR	0.0141871	0.00812384	0.0154354	0.0328465	0.0343918	0.7	0.959	'SI'
AVAL	AS01	0.046195	0.0196172	0.0800284	0.0301793	0.0325225	0.939	0.9635	'MI'
RID	AVAL	0.051035	0.0248014	0.0819296	0.0301793	0.0325225	0.9505	0.9635	'MI'
RMDDL	RMDDR	0.0190905	0.0139273	0.0194921	0.0420417	0.0417428	0.85	0.931	'MM'
AVBL	VD03	0.0279968	0.0247957	0.0624127	0.0287197	0.0325225	0.85	0.9425	'MI'
AIAR	DD03	0.138474	0.0925167	0.0926481	0.0248278	0.0340032	0.9855	0.943	'MI'
AIAR	DD01	0.0697754	0.0682167	0.0385196	0.0204004	0.0291432	0.99	0.9505	'MI'
AVAR	SIBDR	0.0187853	0.0145538	0.0784408	0.037764	0.0445086	0.8	0.928	'II'
AVAR	VD08	0.0411198	0.0135603	0.0403678	0.0304766	0.039652	0.944	0.9155	'MI'
OLQDR	AVL	0.00647018	0.0133388	0.00816256	0.017792	0.0217595	0.25	0.9305	'MS'
SAAVL	DD04	0.0710549	0.0615803	0.0268829	0.0287115	0.0292897	0.9755	0.9775	'MI'
VB02	VA02	0.0233999	0.0229757	0.0234305	0.0260593	0.0274215	0.8	0.993	'MM'
CEPDR	AVJL	0.00780798	0.0201493	0.00816256	0.0253115	0.0292876	0.3	0.932	'SI'
CEPVR	AVJL	0.00780798	0.0201493	0.00816256	0.0253115	0.0292876	0.3	0.9495	'SI'
RIAL	VD03	0.0479324	0.0199317	0.063179	0.0382841	0.0350516	0.941	0.9395	'MI'
AVBL	RIGR	0.0390227	0.0214442	0.0154354	0.023935	0.0254717	0.94	0.9525	'II'
RMDDR	PVPR	0.0193454	0.00746157	0.0205529	0.0452597	0.0438961	0.8	0.952	'MI'
AVL	DA02	0.0174967	0.0145747	0.00744529	0.0117982	0.0216396	0.75	0.85	'MM'
VA01	DA02	0.0233999	0.0103444	0.00526433	0.0117982	0.0216396	0.85	0.9415	'MM'
AVL	VA01	0.00546986	0.0103444	0.00744529	0.0117982	0.0216396	0.2	0.85	'MM'
AIAR	VD08	0.0559789	0.0510717	0.04366	0.0204004	0.0268793	0.9835	0.951	'MI'
RIAR	PVPR	0.0193454	0.014703	0.0143165	0.0409045	0.0400104	0.8	0.9415	'II'
RIAR	VC03	0.0286214	0.023508	0.0319307	0.0409045	0.0400104	0.9	0.9415	'MI'
RIAR	VD01	0.0520624	0.0573853	0.0215894	0.0409045	0.0400104	0.946	0.9415	'MI'
AIAR	VD03	0.0877033	0.0454466	0.0829329	0.0302556	0.0315642	0.997	0.961	'MI'
SMDVR	RMDDL	0.0124631	0.00669032	0.013984	0.0369384	0.0373937	0.5	0.93	'MM'
AVAR	ADFR	0.0251473	0.0145538	0.0839054	0.037764	0.0445086	0.85	0.9335	'SI'
RMDL	RIGR	0.0569484	0.00669032	0.00670825	0.0236573	0.0252026	0.9925	0.942	'MI'
OLQDR	RMDL	0.00629055	0.00669032	0.00670825	0.0236573	0.0252026	0.25	0.941	'MS'
RMDL	SMBVL	0.0239445	0.00669032	0.00670825	0.0236323	0.0252026	0.9445	0.9625	'MM'
RMDDR	DVA	0.0288364	0.0329384	0.0226994	0.0328465	0.0343918	0.9	0.9555	'MI'
CEPVR	AVBR	0.0201228	0.0283102	0.00816256	0.0328465	0.0343918	0.8	0.9555	'SI'
SIADL	AVBR	0.013753	0.0310949	0.00816256	0.0328465	0.0343918	0.65	0.942	'II'
CEPVR	DVC	0.0117338	0.0248273	0.0274949	0.0328465	0.0343918	0.45	0.9555	'SI'
CEPDR	DVC	0.0238256	0.0248273	0.0147317	0.0328465	0.0343918	0.93	0.9425	'SI'
CEPDR	PVPR	0.0194402	0.00746157	0.00776017	0.0328465	0.0343918	0.85	0.9425	'SI'
CEPVR	PVPR	0.0187438	0.00746157	0.00776017	0.0328465	0.0343918	0.8	0.9555	'SI'
CEPDR	VC03	0.0224716	0.023508	0.0215894	0.0328465	0.0343918	0.85	0.9425	'MS'
CEPVR	VC03	0.0290703	0.023508	0.0215894	0.0328465	0.0343918	0.9	0.9555	'MS'
CEPDR	AVBR	0.0201228	0.0310949	0.00816256	0.0328465	0.0343918	0.85	0.9425	'SI'
AVAR	RIR	0.030206	0.0145538	0.0784408	0.037764	0.0445086	0.939	0.9335	'II'
AVAR	DVA	0.0381516	0.0196795	0.0380209	0.0383384	0.0372039	0.9235	0.9535	'II'
AVAR	VA10	0.0249655	0.0124502	0.0778197	0.0304766	0.0372039	0.9	0.9275	'MI'
AVAL	AVL	0.0338246	0.0256227	0.0765324	0.0250855	0.0317396	0.85	0.925	'MI'
RMDL	RIAR	0.0124631	0.0139273	0.0194921	0.0345494	0.0342419	0.5	0.933	'MI'
RMEV	RIAR	0.0124631	0.0241317	0.013984	0.0345494	0.0342419	0.55	0.931	'MI'
RMED	RIAR	0.0124631	0.0139273	0.013984	0.0345494	0.0342419	0.5	0.938	'MI'
AVL	DD04	0.0258945	0.059035	0.0265396	0.0234762	0.0250044	0.8	0.9375	'MM'
DD04	DVA	0.057513	0.0724281	0.0371891	0.0234762	0.0250044	0.932	0.958	'MI'
AVBL	AVDL	0.0180765	0.01856	0.00607563	0.0234762	0.0250044	0.8	0.94	'II'
AVBL	AVL	0.0185315	0.023239	0.00607563	0.0229631	0.0250044	0.8	0.9475	'MI'
SMDVL	DD04	0.0513599	0.0575049	0.0268829	0.0328465	0.0343918	0.9275	0.946	'MM'
AVAR	PVNL	0.0280038	0.0124502	0.0817546	0.0358942	0.036989	0.9255	0.9295	'II'
RMEV	PVPL	0.0360927	0.0208108	0.0154354	0.0311149	0.031553	0.923	0.9395	'MI'
RMDL	PVPL	0.0323716	0.0143809	0.00816256	0.0311149	0.031553	0.928	0.942	'MI'
RIAL	AVBL	0.0412711	0.0142149	0.0147255	0.0311149	0.031553	0.9195	0.9255	'II'
AVAL	RMDDL	0.020574	0.0208108	0.081542	0.0292301	0.038194	0.8	0.85	'MI'
AVBL	VD01	0.0543267	0.0545424	0.0139944	0.0343645	0.0340398	0.934	0.9555	'MI'
RMDVR	FLPL	0.0272047	0.0145538	0.0154354	0.0248271	0.0340025	0.85	0.9375	'MS'
RMEL	AVAR	0.0363489	0.019241	0.0881043	0.037764	0.0401501	0.9645	0.952	'MI'
IL2VL	AVAR	0.0367694	0.0145538	0.0839054	0.037764	0.0401501	0.9655	0.9415	'SI'
IL1VR	AVAR	0.0187853	0.0145538	0.0784408	0.0323413	0.0401501	0.8	0.923	'SI'
RIPR	AVAR	0.0257228	0.0145538	0.0784408	0.0435091	0.0401501	0.85	0.956	'II'
AVAR	RIML	0.0364104	0.0145538	0.0839054	0.037764	0.0401501	0.9645	0.952	'MI'
RMDDL	AINR	0.00750973	0.00669032	0.00670825	0.0297754	0.0276171	0.3	0.93	'MI'
RMDDL	AIYL	0.00750973	0.00669032	0.00670825	0.0297754	0.0276171	0.3	0.9445	'MI'
RMDDL	AIZL	0.0195234	0.00669032	0.00670825	0.0297754	0.0276171	0.85	0.9445	'MI'
RMDDL	ALNL	0.0129117	0.00669032	0.00670825	0.0297754	0.0276171	0.55	0.9445	'MS'
RMDDL	ASEL	0.00750973	0.00669032	0.00670825	0.0297754	0.0276171	0.3	0.93	'MS'
RMDDL	ASJR	0.00750973	0.00669032	0.00670825	0.0297754	0.0276171	0.3	0.93	'MS'
RMDDL	AWAL	0.00750973	0.00669032	0.00670825	0.0297754	0.0276171	0.3	0.93	'MS'
RMDDL	AWCL	0.00750973	0.00669032	0.00670825	0.0297754	0.0276171	0.3	0.9445	'MS'
RMDDL	HSNL	0.0138836	0.00812384	0.00670825	0.0270416	0.0276171	0.7	0.9175	'MM'
RMDDL	PLNR	0.0129117	0.00669032	0.00670825	0.0297754	0.0276171	0.55	0.9445	'MS'
RMDDL	RIGR	0.0129117	0.00669032	0.0132784	0.0297754	0.0276171	0.55	0.9305	'MI'
URAVR	RMDDL	0.00629055	0.00669032	0.0132784	0.0297754	0.0276171	0.25	0.93	'MS'
URXL	RMDDL	0.00629055	0.00669032	0.0132784	0.0297754	0.0276171	0.25	0.9445	'MS'
IL1L	RMDDL	0.00629055	0.00669032	0.00670825	0.0297754	0.0276171	0.25	0.9445	'MS'
IL2DL	RMDDL	0.00629055	0.00669032	0.00670825	0.0297754	0.0276171	0.25	0.9445	'MS'
IL2DR	RMDDL	0.00629055	0.00669032	0.00670825	0.0297754	0.0276171	0.25	0.93	'MS'
IL2L	RMDDL	0.00629055	0.00669032	0.00670825	0.0297754	0.0276171	0.25	0.93	'MS'
IL2R	RMDDL	0.00629055	0.00669032	0.00670825	0.0297754	0.0276171	0.25	0.9445	'MS'
IL2VR	RMDDL	0.00629055	0.00669032	0.00670825	0.0297754	0.0276171	0.25	0.93	'MS'
OLQVL	RMDDL	0.00629055	0.00669032	0.00670825	0.0252875	0.0276171	0.25	0.908	'MS'
URYVL	RMDDL	0.00629055	0.00669032	0.00670825	0.0297754	0.0276171	0.25	0.93	'MS'
RMDDL	RMFR	0.00629055	0.00669032	0.00670825	0.0297754	0.0276171	0.25	0.93	'MM'
RMDDL	SAADL	0.0124631	0.00669032	0.00670825	0.0270416	0.0276171	0.45	0.9175	'MI'
RMDDL	SIADR	0.0124631	0.00669032	0.00670825	0.0297754	0.0276171	0.45	0.93	'MI'
RMDDL	SIAVL	0.00629055	0.00669032	0.00670825	0.0297754	0.0276171	0.25	0.93	'MI'
AVAR	VA02	0.0412418	0.0193734	0.0393834	0.0325963	0.0424378	0.9305	0.9235	'MI'
VD06	DVA	0.0545546	0.061485	0.0301775	0.0140787	0.0208651	0.958	0.9775	'MI'
AVAL	ADER	0.0427381	0.0208108	0.081542	0.0305845	0.0350516	0.9385	0.9495	'SI'
CEPDR	AVAL	0.0472519	0.0208108	0.081542	0.0344639	0.0350516	0.951	0.944	'SI'
CEPVR	AVAL	0.0472519	0.0208108	0.081542	0.0344639	0.0350516	0.941	0.956	'SI'
AVAL	SIADL	0.0472519	0.0208108	0.081542	0.0344639	0.0350516	0.951	0.9435	'II'
AVAR	PVCR	0.0343107	0.0124502	0.0325397	0.0268425	0.0366839	0.9405	0.911	'II'
AVAL	AQR	0.0451354	0.0186994	0.0800718	0.0250855	0.03123	0.9455	0.9425	'SI'
ASKR	AVER	0.025057	0.0306349	0.0195031	0.0289128	0.0342577	0.85	0.943	'SI'
RIAR	AIZL	0.0200624	0.00669032	0.013984	0.0294369	0.0298835	0.8	0.943	'II'
RIAR	DD06	0.0203659	0.0256197	0.0209406	0.0294369	0.0298835	0.85	0.918	'MI'
OLQDR	RIAR	0.0124631	0.0139273	0.013984	0.0294369	0.0298835	0.5	0.9285	'SI'
RIAR	SMBDR	0.0124631	0.0139273	0.013984	0.0294369	0.0298835	0.5	0.9285	'MI'
RIAR	SMBVL	0.0124631	0.0139273	0.0194921	0.0294369	0.0298835	0.5	0.943	'MI'
RMEV	VD03	0.0317613	0.0190635	0.068985	0.0211929	0.0310344	0.9	0.85	'MM'
RMDDL	DVB	0.00780798	0.00812384	0.0154354	0.0314495	0.0272287	0.3	0.9505	'MM'
RMEV	AVAR	0.0300932	0.0145538	0.075547	0.037764	0.0401501	0.85	0.9265	'MI'
AVAR	ADER	0.0257228	0.0145538	0.0839054	0.0397556	0.0401501	0.909	0.9465	'SI'
AVAR	ADFL	0.0319677	0.0145538	0.0784408	0.037764	0.0401501	0.929	0.941	'SI'
AVAR	ADLL	0.0141819	0.0145538	0.0839054	0.037764	0.0401501	0.7	0.941	'SI'
AVAR	AFDR	0.0251473	0.0145538	0.0784408	0.037764	0.0401501	0.85	0.952	'SI'
AVAR	AIBR	0.0141819	0.0145538	0.0839054	0.037764	0.0401501	0.65	0.9335	'II'
AVAR	AIMR	0.0352733	0.0145538	0.0784408	0.037764	0.0401501	0.961	0.952	'II'
AVAR	AINL	0.0182036	0.0145538	0.0839054	0.037764	0.0401501	0.8	0.941	'II'
AVAR	AIYR	0.0358442	0.0145538	0.0839054	0.037764	0.0401501	0.9075	0.941	'II'
AVAR	AIZR	0.0202189	0.0145538	0.0839054	0.037764	0.0401501	0.8	0.941	'II'
AVAR	ALML	0.0280038	0.0124502	0.0712148	0.037764	0.0401501	0.9255	0.941	'SI'
AVAR	ALNR	0.0364104	0.0145538	0.0839054	0.037764	0.0401501	0.9645	0.952	'SI'
AVAR	ASER	0.0356377	0.0145538	0.0839054	0.037764	0.0401501	0.9245	0.952	'SI'
AVAR	ASGL	0.0249498	0.0145538	0.0839054	0.037764	0.0401501	0.85	0.9335	'SI'
AVAR	ASGR	0.026755	0.0145538	0.0839054	0.037764	0.0401501	0.85	0.952	'SI'
AVAR	ASHL	0.0271474	0.0145538	0.0839054	0.037764	0.0401501	0.9	0.941	'SI'
AVAR	ASHR	0.0445852	0.0145538	0.0839054	0.037764	0.0401501	0.9825	0.941	'SI'
AVAR	ASIL	0.0182036	0.0145538	0.0784408	0.037764	0.0401501	0.8	0.941	'SI'
AVAR	ASIR	0.0358442	0.0145538	0.0784408	0.037764	0.0401501	0.947	0.941	'SI'
AVAR	AUAL	0.0292983	0.0145538	0.0784408	0.037764	0.0401501	0.915	0.941	'SI'
AVAR	AUAR	0.0257228	0.0145538	0.0784408	0.037764	0.0401501	0.85	0.941	'SI'
OLQDL	AVAR	0.0481138	0.0272569	0.0881043	0.037764	0.0401501	0.977	0.941	'SI'
BAGR	AVAR	0.0364104	0.0145538	0.0839054	0.037764	0.0401501	0.9495	0.941	'SI'
CEPDR	AVAR	0.0257228	0.0145538	0.0839054	0.0397556	0.0401501	0.909	0.9325	'SI'
CEPVR	AVAR	0.0255629	0.0145538	0.0839054	0.0397556	0.0401501	0.85	0.942	'SI'
IL1DL	AVAR	0.0300932	0.0145538	0.0839054	0.037764	0.0401501	0.92	0.941	'SI'
IL1DR	AVAR	0.0147274	0.0145538	0.0839054	0.037764	0.0401501	0.7	0.941	'SI'
OLLL	AVAR	0.0300932	0.0145538	0.0839054	0.037764	0.0401501	0.92	0.941	'SI'
OLLR	AVAR	0.0292983	0.0145538	0.0839054	0.037764	0.0401501	0.9335	0.952	'SI'
RIPL	AVAR	0.0318635	0.0145538	0.0839054	0.0435069	0.0401501	0.9295	0.9555	'II'
RMER	AVAR	0.0147274	0.0145538	0.0839054	0.037764	0.0401501	0.75	0.9365	'MI'
URADL	AVAR	0.0147274	0.0145538	0.0839054	0.0380893	0.0401501	0.7	0.942	'SI'
URXR	AVAR	0.0293077	0.0145538	0.0839054	0.037764	0.0401501	0.934	0.941	'SI'
URYDR	AVAR	0.0292983	0.0145538	0.0839054	0.037764	0.0401501	0.915	0.941	'SI'
BAGL	AVAR	0.0336454	0.0145538	0.0839054	0.037764	0.0401501	0.938	0.941	'SI'
AFDL	AVAR	0.0358442	0.0145538	0.0784408	0.037764	0.0401501	0.9465	0.941	'SI'
IL1R	AVAR	0.0257228	0.0145538	0.0784408	0.037764	0.0401501	0.909	0.941	'SI'
IL1VL	AVAR	0.0364104	0.0145538	0.0784408	0.0380893	0.0401501	0.9645	0.942	'SI'
URAVL	AVAR	0.0292983	0.0145538	0.0784408	0.037764	0.0401501	0.9335	0.941	'SI'
URBR	AVAR	0.0318635	0.0145538	0.0784408	0.037764	0.0401501	0.9295	0.941	'SI'
URYDL	AVAR	0.0255629	0.0145538	0.0784408	0.037764	0.0401501	0.85	0.941	'SI'
URYVR	AVAR	0.0370737	0.0145538	0.0784408	0.037764	0.0401501	0.9665	0.952	'SI'
CEPVL	AVAR	0.0304404	0.0145538	0.0784408	0.037764	0.0401501	0.922	0.941	'SI'
RMED	AVAR	0.0366942	0.0145538	0.0777347	0.0380893	0.0401501	0.9505	0.934	'MI'
AVAR	AWAR	0.0298712	0.0145538	0.0784408	0.037764	0.0401501	0.9185	0.952	'SI'
AVAR	AWBL	0.0147274	0.0145538	0.0839054	0.040209	0.0401501	0.7	0.948	'SI'
AVAR	AWCR	0.0295414	0.0145538	0.0784408	0.037764	0.0401501	0.9145	0.941	'SI'
AVAR	PLNL	0.0364104	0.0145538	0.0784408	0.037764	0.0401501	0.9645	0.941	'SI'
AVAR	PVT	0.0253917	0.0145538	0.0839054	0.037764	0.0401501	0.85	0.941	'II'
AVAR	RICL	0.0304404	0.0145538	0.0779595	0.037764	0.0401501	0.922	0.941	'II'
AVAR	RICR	0.0147274	0.0145538	0.0839054	0.037764	0.0401501	0.75	0.941	'II'
AVAR	RIH	0.0257228	0.0145538	0.0839054	0.037764	0.0401501	0.85	0.9335	'II'
AVAR	RIVL	0.0147274	0.0145538	0.0839054	0.037764	0.0401501	0.7	0.952	'MI'
AVAR	RIVR	0.0323229	0.0217862	0.0881043	0.037764	0.0401501	0.9	0.941	'MI'
AVAR	RMFL	0.0366942	0.0145538	0.0784408	0.037764	0.0401501	0.9345	0.941	'MI'
AVAR	RMGR	0.0292983	0.0145538	0.0839054	0.037764	0.0401501	0.915	0.941	'MI'
AVAR	RMHR	0.0364104	0.0145538	0.0784408	0.037764	0.0401501	0.9645	0.941	'MI'
AVAR	SIADL	0.0364104	0.0145538	0.0784408	0.0397556	0.0401501	0.9645	0.9325	'II'
AVAR	SIAVR	0.0257228	0.0145538	0.0839054	0.037764	0.0401501	0.909	0.941	'II'
AVAR	SIBDL	0.0422915	0.0145538	0.0839054	0.037764	0.0401501	0.9665	0.941	'II'
AVAR	SIBVR	0.0292983	0.0145538	0.0784408	0.0380893	0.0401501	0.915	0.9275	'II'
AVAR	SMBDL	0.0262293	0.0145538	0.0839054	0.037764	0.0401501	0.85	0.941	'MI'
RMDVR	AVAL	0.0476512	0.0208108	0.0822276	0.040209	0.0401501	0.9145	0.961	'MI'
AVBR	DD03	0.0858254	0.0768001	0.093612	0.0342957	0.0382766	0.9505	0.9465	'MI'
VD02	DVA	0.0549356	0.0706626	0.0470632	0.0229639	0.0296957	0.949	0.939	'MI'
VD02	VA03	0.0337587	0.0486485	0.0399983	0.0229639	0.0296957	0.907	0.939	'MM'
VD02	VA05	0.0296662	0.0611699	0.0351185	0.0229639	0.0296957	0.85	0.939	'MM'
VD02	VB04	0.0296662	0.0611699	0.0303773	0.0229639	0.0296957	0.85	0.939	'MM'
VD02	VB05	0.0376633	0.0653703	0.0238783	0.0229639	0.0296957	0.9245	0.939	'MM'
SABD	VD02	0.0354996	0.0585447	0.0351185	0.0229639	0.0296957	0.9065	0.939	'MI'
AQR	VD02	0.038335	0.0620712	0.0260346	0.0229639	0.0296957	0.9395	0.939	'MS'
VD02	VD06	0.0589353	0.0746275	0.0316441	0.0229639	0.0296957	0.9525	0.939	'MM'
VD02	VD10	0.0547853	0.0626667	0.0380977	0.0229639	0.0296957	0.9375	0.939	'MM'
VD01	DA09	0.0454267	0.0518731	0.0139944	0.0292539	0.0296834	0.939	0.9655	'MM'
VD01	DVB	0.0407369	0.0545424	0.0139944	0.0292539	0.0296834	0.914	0.9655	'MM'
VC04	DVC	0.0230328	0.0238338	0.0140009	0.0292539	0.0296834	0.85	0.95	'MI'
VD01	PDEL	0.0426603	0.0545424	0.0139944	0.0292539	0.0296834	0.922	0.9655	'MS'
VD01	PVCL	0.0683463	0.0611624	0.0139944	0.0292539	0.0296834	0.9685	0.9655	'MI'
VA09	PVPR	0.0262766	0.00712585	0.0140009	0.0292539	0.0296834	0.85	0.9655	'MI'
AVL	PVPR	0.0177602	0.0166029	0.00744529	0.0292539	0.0296834	0.8	0.95	'MI'
VD01	VB08	0.0413342	0.0401191	0.0139944	0.0292539	0.0296834	0.9085	0.9655	'MM'
AVL	VC03	0.0208803	0.0283455	0.0212644	0.0292539	0.0296834	0.8	0.95	'MM'
AS01	VC03	0.0214423	0.0223099	0.0190839	0.0292539	0.0296834	0.8	0.9655	'MM'
VC01	VC03	0.0161308	0.0169694	0.0190839	0.0283858	0.0296834	0.75	0.9625	'MM'
VD01	VC04	0.0478394	0.0596107	0.0118065	0.0292539	0.0296834	0.9365	0.95	'MM'
AVDL	VD01	0.0426891	0.0545424	0.0139944	0.0292539	0.0296834	0.931	0.9425	'MI'
AVL	VD01	0.038773	0.0493286	0.0139944	0.0292539	0.0296834	0.9075	0.95	'MM'
FLPR	VD01	0.0464034	0.0545424	0.0139944	0.0292539	0.0296834	0.931	0.9655	'MS'
VD01	VD04	0.0672656	0.0596107	0.0165766	0.0292539	0.0296834	0.954	0.95	'MM'
VD01	VD10	0.0689321	0.0600247	0.0212818	0.0292064	0.0296834	0.9495	0.9655	'MM'
VD01	VD13	0.0460981	0.0545424	0.0139944	0.0292539	0.0296834	0.921	0.9655	'MM'
ASKR	VD02	0.0446647	0.0697687	0.0384397	0.0279196	0.0315642	0.947	0.9455	'MS'
ASKR	VD01	0.0515024	0.0549305	0.0143165	0.0311149	0.031553	0.9445	0.956	'MS'
AVAR	PVPL	0.0297759	0.0124502	0.0252969	0.0383384	0.042937	0.85	0.923	'II'
RMDDL	RIBR	0.00629055	0.0139273	0.00670825	0.0369384	0.0373937	0.25	0.93	'MI'
DD03	DVA	0.0864961	0.0935051	0.0863607	0.0249484	0.028822	0.9445	0.964	'MI'
DD03	VD10	0.0977456	0.0856472	0.0863607	0.0249484	0.028822	0.951	0.964	'MM'
AVBL	RIGL	0.0411006	0.0214442	0.0154354	0.0311149	0.031553	0.933	0.946	'II'
ASJR	VD03	0.0154749	0.0190635	0.0569927	0.0211937	0.0268793	0.75	0.915	'MS'
RIAL	AVDL	0.0361234	0.00812384	0.0154354	0.0253363	0.026873	0.938	0.9	'II'
RIAL	AVG	0.0361234	0.00812384	0.0154354	0.0253363	0.026873	0.9245	0.909	'SI'
RIAL	HSNR	0.0296184	0.0153576	0.0154354	0.0253363	0.026873	0.85	0.909	'MI'
RIAL	PVNL	0.0439296	0.0256197	0.0154354	0.0253363	0.026873	0.9625	0.9	'II'
RIAL	VB01	0.0353555	0.00728914	0.0150404	0.0253363	0.026873	0.9105	0.924	'MI'
RIAL	VC04	0.0355872	0.0136907	0.0205529	0.0253363	0.026873	0.923	0.909	'MI'
RIAL	VC05	0.0355872	0.014703	0.0154354	0.0253363	0.026873	0.922	0.909	'MI'
RIAL	VD04	0.04632	0.0394242	0.0143165	0.0253363	0.026873	0.9305	0.909	'MI'
RIAL	VD11	0.0361234	0.00812384	0.0154354	0.0253363	0.026873	0.938	0.924	'MI'
AVEL	DD01	0.0255053	0.021767	0.0216066	0.0287115	0.0343975	0.85	0.939	'MI'
DD04	PVQR	0.0909752	0.0471235	0.0268829	0.0248271	0.0273272	0.986	0.944	'MI'
RMDVR	SAADR	0.0324921	0.0131157	0.013984	0.019523	0.0293645	0.85	0.936	'MI'
RIAR	AIAR	0.0266602	0.0266212	0.0322401	0.0311681	0.0327221	0.917	0.9355	'II'
RIAR	VA08	0.0193454	0.014703	0.0143165	0.0307554	0.0292876	0.8	0.9345	'MI'
OLQDR	VD02	0.0385977	0.0597343	0.0303841	0.0248278	0.0292897	0.9405	0.93	'MS'
RIAR	PVPL	0.0323716	0.0216069	0.0154354	0.0362265	0.0359103	0.928	0.9305	'II'
RIAL	PVPR	0.0429466	0.00746157	0.0143165	0.0362265	0.0359103	0.9345	0.9275	'II'
RIAL	VD01	0.06782	0.0573853	0.0215894	0.0362265	0.0359103	0.949	0.9275	'MI'
RMDDL	VD01	0.0520624	0.0573853	0.0143165	0.0362265	0.0359103	0.955	0.9275	'MM'
AVER	AQR	0.0218597	0.0145538	0.0154383	0.0269576	0.0315642	0.8	0.9515	'SI'
AVER	AS01	0.0185756	0.0136914	0.0150431	0.0269576	0.0315642	0.75	0.9515	'MI'
AVER	AS02	0.0185756	0.0136914	0.0215988	0.0269576	0.0315642	0.75	0.9515	'MI'
AVER	AS03	0.0185756	0.0136914	0.0215988	0.0269576	0.0315642	0.75	0.9515	'MI'
AVER	AS04	0.0256379	0.0138915	0.0215988	0.0269576	0.0315642	0.85	0.9515	'MI'
AVER	AS05	0.019278	0.0138915	0.0150431	0.0269576	0.0315642	0.8	0.9515	'MI'
AVER	AS06	0.019278	0.0138915	0.0215988	0.0269576	0.0315642	0.8	0.9515	'MI'
AVER	AS07	0.0300932	0.0145538	0.0154383	0.0269576	0.0315642	0.907	0.9515	'MI'
AVER	AS08	0.0193225	0.0145538	0.0154383	0.0269576	0.0315642	0.8	0.9515	'MI'
AVER	AS09	0.0198396	0.0145538	0.0154383	0.0269576	0.0315642	0.8	0.9515	'MI'
AVER	AS10	0.0144436	0.0145538	0.0154383	0.0269576	0.0315642	0.7	0.9515	'MI'
AVER	AS11	0.0367288	0.0145538	0.0154383	0.0269576	0.0315642	0.939	0.9515	'MI'
ALA	AVER	0.0193225	0.0145538	0.0154383	0.0269576	0.0315642	0.8	0.9515	'II'
AVER	AVL	0.0118712	0.0136914	0.0220001	0.0269576	0.0315642	0.5	0.935	'MI'
AVER	AVM	0.0255629	0.0145538	0.0154383	0.0248278	0.0315642	0.85	0.941	'SI'
AVER	DA01	0.028526	0.0242854	0.0154383	0.0269576	0.0315642	0.8	0.9515	'MI'
AVER	DA02	0.0352558	0.0197121	0.0215988	0.0269576	0.0315642	0.85	0.9515	'MI'
AVER	DA03	0.0296088	0.0138915	0.0215988	0.0269576	0.0315642	0.85	0.9515	'MI'
AVER	DA04	0.018777	0.0138915	0.0150431	0.0269576	0.0315642	0.75	0.9515	'MI'
AVER	DA05	0.019278	0.0138915	0.0215988	0.0269576	0.0315642	0.8	0.9515	'MI'
AVER	DA06	0.0300932	0.0145538	0.0220001	0.0269576	0.0315642	0.907	0.9515	'MI'
AVER	DA07	0.0193225	0.0145538	0.0154383	0.0269576	0.0315642	0.8	0.9515	'MI'
AVER	DA08	0.0300932	0.0145538	0.0154383	0.0269576	0.0315642	0.907	0.9515	'MI'
AVER	DB01	0.0190675	0.0136914	0.0215988	0.0269576	0.0315642	0.8	0.9515	'MI'
AVER	DB02	0.0136968	0.0136914	0.0150431	0.0269576	0.0315642	0.65	0.9515	'MI'
AVER	DB03	0.019278	0.0138915	0.0150431	0.0269576	0.0315642	0.8	0.9515	'MI'
AVER	DB04	0.0138982	0.0138915	0.0150431	0.0269576	0.0315642	0.65	0.9515	'MI'
AVER	DB05	0.0193225	0.0145538	0.0154383	0.0269576	0.0315642	0.8	0.9515	'MI'
AVER	DB06	0.0144436	0.0145538	0.0154383	0.0269576	0.0315642	0.7	0.9515	'MI'
AVER	DB07	0.0193225	0.0145538	0.0154383	0.0269576	0.0315642	0.8	0.9515	'MI'
AVER	DD05	0.0270755	0.0145538	0.0275294	0.0248278	0.0315642	0.8	0.941	'MI'
AVER	FLPR	0.0235427	0.0145538	0.0154383	0.0269576	0.0315642	0.8	0.9515	'SI'
AVER	LUAL	0.0144436	0.0145538	0.0154383	0.0269576	0.0315642	0.7	0.9515	'II'
AVER	LUAR	0.00780798	0.0145538	0.0154383	0.0269576	0.0315642	0.35	0.9515	'II'
AVER	PDA	0.0193225	0.0145538	0.0154383	0.0269576	0.0315642	0.8	0.9515	'MI'
AVER	PDB	0.0144436	0.0145538	0.0154383	0.0269576	0.0315642	0.7	0.9515	'MI'
AVER	PDEL	0.0247184	0.0145538	0.0154383	0.0269576	0.0315642	0.85	0.9515	'SI'
AVER	PHAL	0.0193225	0.0145538	0.0154383	0.0269576	0.0315642	0.8	0.9515	'SI'
AVER	PHBL	0.00780798	0.0145538	0.0154383	0.0269576	0.0315642	0.35	0.9515	'SI'
AVER	PHCL	0.0308177	0.0145538	0.0154383	0.0269576	0.0315642	0.85	0.9515	'SI'
AVER	PHCR	0.0265932	0.0145538	0.0154383	0.0269576	0.0315642	0.85	0.9515	'SI'
AVER	PLML	0.0289438	0.0145538	0.00816256	0.0269576	0.0315642	0.85	0.9515	'SI'
AVER	PLMR	0.0300932	0.0145538	0.0154383	0.0269576	0.0315642	0.85	0.9515	'SI'
AVER	PQR	0.0144436	0.0145538	0.0154383	0.0269576	0.0315642	0.7	0.9515	'SI'
AVER	PVCL	0.0255629	0.0145538	0.0154383	0.0248278	0.0315642	0.85	0.941	'II'
AVER	PVDL	0.0300932	0.0145538	0.0154383	0.0269576	0.0315642	0.907	0.9515	'II'
AVER	PVDR	0.00780798	0.0145538	0.0154383	0.0269576	0.0315642	0.35	0.9515	'II'
AVER	PVM	0.0193225	0.0145538	0.0154383	0.0269576	0.0315642	0.8	0.9515	'SI'
AVER	PVWL	0.0235427	0.0145538	0.0154383	0.0269576	0.0315642	0.85	0.9515	'II'
AVER	PVWR	0.0267385	0.0145538	0.0154383	0.0269576	0.0315642	0.85	0.9515	'II'
AVER	SABD	0.0185756	0.0239439	0.0215988	0.0269576	0.0315642	0.75	0.9515	'II'
AVER	SABVL	0.0136968	0.0136914	0.00816256	0.0269576	0.0315642	0.65	0.9515	'II'
AVER	SABVR	0.0136968	0.0136914	0.0154383	0.0269576	0.0315642	0.65	0.9515	'II'
AVER	SDQL	0.0193225	0.0145538	0.0154383	0.0269576	0.0315642	0.8	0.9515	'II'
AVER	VA01	0.0293508	0.0136914	0.0215988	0.0269576	0.0315642	0.85	0.9515	'MI'
AVER	VA03	0.0185756	0.0136914	0.0215988	0.0269576	0.0315642	0.75	0.9515	'MI'
AVER	VA04	0.018777	0.0138915	0.0215988	0.0269576	0.0315642	0.75	0.9515	'MI'
AVER	VA05	0.0296088	0.0138915	0.0215988	0.0269576	0.0315642	0.85	0.9515	'MI'
AVER	VA06	0.018777	0.0138915	0.0150431	0.0269576	0.0315642	0.75	0.9515	'MI'
AVER	VA07	0.0213059	0.0138915	0.0215988	0.0269576	0.0315642	0.8	0.9515	'MI'
AVER	VA08	0.0411233	0.0138915	0.0150431	0.0269576	0.0315642	0.9315	0.9345	'MI'
AVER	VA09	0.0270755	0.0145538	0.026803	0.0248278	0.0315642	0.85	0.941	'MI'
AVER	VA10	0.0255629	0.0145538	0.0154383	0.0269576	0.0315642	0.85	0.9515	'MI'
AVER	VA12	0.0367288	0.0145538	0.0154383	0.0269576	0.0315642	0.939	0.9515	'MI'
AVER	VB02	0.0144206	0.0136914	0.0349725	0.0269576	0.0315642	0.65	0.9515	'MI'
AVER	VB03	0.00726252	0.0138915	0.0150431	0.0269576	0.0315642	0.3	0.9515	'MI'
AVER	VB04	0.0213142	0.0138915	0.0215988	0.0269576	0.0315642	0.8	0.9515	'MI'
AVER	VB05	0.0138982	0.0138915	0.0216066	0.0269576	0.0315642	0.65	0.9515	'MI'
AVER	VB06	0.0296088	0.0138915	0.0215988	0.0269576	0.0315642	0.85	0.9515	'MI'
AVER	VB07	0.0193225	0.0145538	0.0150431	0.0269576	0.0315642	0.8	0.9515	'MI'
AVER	VB08	0.0270755	0.0145538	0.0220001	0.0269576	0.0315642	0.85	0.9515	'MI'
AVER	VB09	0.0179847	0.0248532	0.0154383	0.0269576	0.0315642	0.75	0.9345	'MI'
AVER	VB10	0.00780798	0.0145538	0.0154383	0.0269576	0.0315642	0.35	0.9515	'MI'
AVER	VB11	0.015224	0.0145538	0.0154383	0.0269576	0.0315642	0.75	0.9515	'MI'
AVER	VC01	0.0185756	0.0136914	0.0215988	0.0269576	0.0315642	0.75	0.9515	'MI'
AVER	VC02	0.0138982	0.0138915	0.0215988	0.0269576	0.0315642	0.65	0.9515	'MI'
AVER	VD06	0.0393291	0.0597658	0.0305164	0.0269576	0.0315642	0.9	0.9515	'MI'
AVER	VD07	0.0304748	0.0138915	0.0154383	0.0269576	0.0315642	0.85	0.9515	'MI'
AVER	VD10	0.0507631	0.0272569	0.0323022	0.0269576	0.0315642	0.9315	0.9515	'MI'
AVER	VD11	0.0300932	0.0145538	0.0154383	0.0269576	0.0315642	0.907	0.9515	'MI'
AVER	VD12	0.0257296	0.0145538	0.0154383	0.0269576	0.0315642	0.85	0.9515	'MI'
AVER	VD13	0.0411918	0.0145538	0.0220001	0.0269576	0.0315642	0.929	0.9515	'MI'
VD10	DVA	0.0406887	0.0187217	0.0254065	0.0193254	0.0198949	0.913	0.995	'MI'
VB02	VA03	0.0160455	0.0162055	0.0186463	0.015441	0.0198949	0.75	0.987	'MM'
AVDL	AVL	0.0062167	0.0129955	0.00607563	0.0117982	0.0198918	0.25	0.8	'MI'
AVL	PDER	0.00303439	0.0129955	0.00607563	0.0234762	0.0198918	0.15	0.989	'MS'
VD04	PVNL	0.0184803	0.0547472	0.0212644	0.0140787	0.0198918	0.8	0.85	'MI'
AVL	PVNL	0.0116178	0.0256886	0.0133455	0.0117982	0.0198918	0.45	0.8	'MI'
AVL	VA09	0.0208401	0.00695342	0.0174402	0.0193246	0.0198918	0.85	0.9745	'MM'
VD04	VC04	0.0213254	0.0365433	0.0118065	0.0159329	0.0198918	0.8	0.9115	'MM'
AVL	VC04	0.00567124	0.0123408	0.00744529	0.0159329	0.0198918	0.2	0.9115	'MM'
VD04	VC05	0.0215809	0.0365433	0.0139944	0.0140787	0.0198918	0.8	0.85	'MM'
AVDL	VD04	0.0239267	0.0390587	0.0139944	0.0140787	0.0198918	0.85	0.85	'MI'
VA08	VD09	0.0163147	0.00712585	0.00744529	0.019843	0.0198918	0.75	0.9765	'MM'
AVL	VD09	0.0082068	0.00695342	0.00607563	0.0234762	0.0198918	0.35	0.989	'MM'
SMDVL	AVL	0.012649	0.0133388	0.00816256	0.0253115	0.0292876	0.55	0.9365	'MM'
DD01	DD04	0.0754914	0.0696272	0.0276539	0.0268425	0.0274215	0.9615	0.9535	'MM'
VD04	DD04	0.0942713	0.0865844	0.0276539	0.0220708	0.023599	0.977	0.9285	'MM'
DD04	PVNL	0.0729282	0.0753994	0.0337881	0.0220708	0.023599	0.9775	0.917	'MI'
AIBL	DD04	0.0497943	0.0710464	0.0268829	0.0253363	0.026873	0.9325	0.9475	'MI'
AVKL	DVA	0.0268489	0.00812384	0.00816256	0.0159505	0.0197942	0.85	0.9465	'II'
DD01	DD03	0.0920051	0.0884323	0.0792384	0.0229639	0.0321393	0.9515	0.9325	'MM'
AVKL	DD04	0.0745062	0.0596031	0.0268829	0.0248271	0.0235165	0.9725	0.944	'MI'
SAADL	DD04	0.0396085	0.0639108	0.0268829	0.0253363	0.0235165	0.9105	0.9465	'MI'
SAADR	DD04	0.0785087	0.0615803	0.0268829	0.0248271	0.0235165	0.967	0.9645	'MI'
SAAVR	DD04	0.0571636	0.0615803	0.0268829	0.0285082	0.0235165	0.94	0.96	'MI'
AIZL	DD04	0.0500081	0.0639108	0.0268829	0.0253363	0.0235165	0.926	0.9665	'MI'
OLQDR	AVBL	0.0267357	0.0142149	0.0154354	0.0253363	0.0235165	0.9125	0.9585	'SI'
CEPDR	AVDL	0.00780798	0.00812384	0.00816256	0.0217195	0.0235165	0.3	0.9165	'SI'
CEPVR	AVDL	0.00780798	0.00812384	0.00816256	0.0217195	0.0235165	0.3	0.937	'SI'
SIADL	AVDL	0.00780798	0.00812384	0.00816256	0.0211937	0.0235165	0.3	0.912	'II'
AVBL	AVKL	0.0327558	0.0214442	0.00816256	0.0211929	0.0235165	0.9285	0.9355	'II'
CEPDR	PVNL	0.00780798	0.0208234	0.0154354	0.0239187	0.0235165	0.3	0.929	'SI'
AVBL	RMFR	0.0201228	0.0142149	0.00816256	0.023935	0.0235165	0.8	0.952	'MI'
RMDVL	RMDDL	0.0239445	0.0139273	0.013984	0.0420417	0.0417428	0.9445	0.9215	'MM'
VD05	DVA	0.0400217	0.0521853	0.021991	0.0117982	0.0216396	0.933	0.9415	'MI'
RMDVL	DD05	0.0331977	0.00812384	0.0619209	0.0310668	0.0350516	0.925	0.934	'MM'
RMEV	RMDVR	0.0177596	0.0131157	0.0139867	0.0270416	0.0327272	0.75	0.932	'MM'
AIZL	VD03	0.0218487	0.0190635	0.0608797	0.0189704	0.0263811	0.8	0.92	'MI'
AVAR	AIBL	0.0271729	0.0217831	0.0784408	0.037764	0.0388537	0.9	0.9415	'II'
PVPR	DVC	0.0230328	0.027398	0.00744529	0.0390413	0.0381387	0.85	0.951	'II'
VD01	PVPR	0.0449141	0.0536428	0.0118065	0.0390413	0.0381387	0.9165	0.951	'MI'
VD01	VC03	0.0554373	0.0669539	0.0165766	0.0390413	0.0381387	0.9335	0.951	'MM'
RMEV	RIAL	0.0450952	0.024196	0.013984	0.0294369	0.0298835	0.9375	0.9105	'MI'
RIAL	RMDL	0.0303689	0.0139273	0.0194921	0.0294369	0.0298835	0.85	0.9125	'MI'
RMDDL	SIBDR	0.0129117	0.00669032	0.013984	0.0270416	0.0327272	0.55	0.9	'MI'
RMDDL	SMDDL	0.00629055	0.00669032	0.0194921	0.0311681	0.0327221	0.25	0.9255	'MM'
RMDDL	SMDDR	0.00629055	0.0139273	0.0194921	0.0311681	0.0327221	0.3	0.9255	'MM'
RIAR	RMDR	0.0124631	0.0139273	0.0194921	0.0345494	0.0342419	0.55	0.941	'MI'
VD02	DA03	0.0253923	0.0611699	0.0272139	0.0229639	0.0286043	0.85	0.939	'MM'
AIAR	DA03	0.0372123	0.0448735	0.0298487	0.0173042	0.0227232	0.9685	0.9595	'MI'
AIAR	VA08	0.0270985	0.0448735	0.0298487	0.0173042	0.0227232	0.9	0.925	'MI'
RIGL	PVNL	0.0209	0.0256197	0.0154354	0.0253363	0.026873	0.85	0.924	'II'
RIGL	VD04	0.0262152	0.0329293	0.0143165	0.0253363	0.026873	0.85	0.9335	'MI'
RMDL	DD04	0.0994516	0.0522698	0.0268829	0.0253363	0.026873	0.9895	0.9245	'MM'
RMDL	FLPL	0.0254803	0.00812384	0.00816256	0.0253363	0.026873	0.956	0.9415	'MS'
VD02	SDQR	0.0323355	0.0536821	0.0376671	0.0248278	0.028497	0.9	0.93	'MI'
SAAVR	VD02	0.067359	0.0434014	0.0384397	0.0248278	0.028497	0.9765	0.93	'MI'
RMGL	VD02	0.0385977	0.0624735	0.0384397	0.0248278	0.028497	0.9405	0.931	'MM'
ASJR	VD02	0.0497886	0.0597343	0.0329118	0.0248278	0.028497	0.9595	0.93	'MS'
AVAL	DD03	0.0694965	0.0747348	0.0829644	0.0362238	0.0382805	0.9055	0.949	'MI'
AVJR	SIADL	0.0141871	0.00812384	0.0154354	0.0310668	0.031553	0.7	0.939	'II'
DD04	PVPL	0.0507991	0.070636	0.0298735	0.0292539	0.0296834	0.918	0.932	'MI'
AVBL	PVPL	0.0241866	0.0167622	0.0133485	0.0292539	0.0296834	0.8	0.941	'II'
AVAR	ALMR	0.0284286	0.0124502	0.0817546	0.0287115	0.0350516	0.9075	0.92	'SI'
AVAR	DD06	0.00578054	0.0124502	0.0762737	0.0269547	0.0350516	0.25	0.85	'MI'
AVL	VD02	0.0308912	0.0570705	0.0380977	0.0229631	0.0283924	0.85	0.92	'MM'
AVER	ADAL	0.0144436	0.0145538	0.0154383	0.0269576	0.0306856	0.7	0.9515	'II'
AVER	DA09	0.0300932	0.0145538	0.0154383	0.0269576	0.0306856	0.907	0.9515	'MI'
AVER	DVA	0.0382094	0.0375862	0.0209521	0.0269576	0.0306856	0.9	0.9515	'II'
AVER	DVB	0.015224	0.0145538	0.0220001	0.0269576	0.0306856	0.7	0.9515	'MI'
AVER	PDER	0.00647018	0.0386474	0.0154383	0.0269576	0.0306856	0.25	0.9515	'SI'
AVER	PHAR	0.0255629	0.0145538	0.0154383	0.0269576	0.0306856	0.85	0.9515	'SI'
AVER	PVNR	0.0144436	0.0145538	0.0292538	0.0248278	0.0306856	0.7	0.941	'II'
AVER	RIFR	0.0189956	0.0145538	0.0154383	0.0269576	0.0306856	0.75	0.9515	'II'
AVER	VA11	0.0235427	0.0145538	0.0154383	0.0248278	0.0306856	0.8	0.941	'MI'
AVER	VB01	0.0144206	0.0136914	0.0215988	0.0269576	0.0306856	0.7	0.9515	'MI'
AVER	VC04	0.0202581	0.0138915	0.0150431	0.0269576	0.0306856	0.8	0.935	'MI'
AVER	VD09	0.0270755	0.0145538	0.0220001	0.0269576	0.0306856	0.85	0.9515	'MI'
AIBL	VD01	0.0458395	0.0675402	0.0143165	0.0311149	0.031553	0.93	0.9565	'MI'
IL1VR	VD01	0.0463995	0.0549305	0.0143165	0.0311149	0.031553	0.942	0.9565	'MS'
IL2VL	VD01	0.0515489	0.0549305	0.0143165	0.0311149	0.031553	0.954	0.9565	'MS'
RIPR	VD01	0.0463995	0.0549305	0.0143165	0.0311149	0.031553	0.932	0.9565	'MI'
AVAR	VD03	0.0406649	0.0187323	0.0751908	0.0462107	0.0415579	0.9375	0.946	'MI'
SIBVL	VD02	0.0455172	0.0608588	0.0376671	0.0248278	0.0315642	0.9395	0.93	'MI'
AWBR	DD01	0.0208562	0.0343877	0.0281413	0.0136657	0.0227225	0.8	0.9145	'MS'
SMBVR	DD01	0.0285117	0.0343877	0.0208583	0.0136657	0.0227225	0.9215	0.85	'MM'
AS01	VA02	0.0233999	0.0103444	0.00526433	0.015441	0.0246163	0.85	0.9405	'MM'
DD01	VA02	0.0369392	0.0333684	0.0183342	0.0229631	0.0283924	0.91	0.965	'MM'
DD01	VD05	0.0265582	0.0415226	0.0118065	0.015441	0.0246163	0.85	0.9405	'MM'
RMDL	DD01	0.0285117	0.0343877	0.0143165	0.0173042	0.0264795	0.9	0.85	'MM'
AVEL	AVBL	0.0201398	0.0142149	0.0275294	0.0287115	0.0330961	0.8	0.9275	'II'
AVAL	PVQL	0.03769	0.0208108	0.081542	0.0344639	0.0330941	0.909	0.953	'II'
AVEL	AQR	0.0127026	0.00812384	0.0154383	0.0287115	0.0292897	0.55	0.9555	'SI'
AVAL	ADAR	0.0421564	0.0208108	0.079361	0.0269547	0.0292876	0.926	0.9515	'II'
AVAL	ADLR	0.0466702	0.0208108	0.081542	0.0269547	0.0292876	0.9395	0.934	'SI'
AVAL	AINR	0.0466702	0.0208108	0.081542	0.0269547	0.0292876	0.9495	0.934	'II'
AVAL	AIYL	0.0466702	0.0208108	0.081542	0.0269547	0.0292876	0.9395	0.9515	'II'
AVAL	AIZL	0.0317699	0.0208108	0.081542	0.0269547	0.0292876	0.85	0.9515	'II'
AVAL	ALMR	0.0248838	0.0186994	0.0800718	0.0269547	0.0292876	0.8	0.9515	'SI'
AVAL	ALNL	0.0431375	0.0208108	0.081542	0.0269547	0.0292876	0.928	0.9515	'SI'
AVAL	ASEL	0.0422368	0.0208108	0.081542	0.0269547	0.0292876	0.926	0.934	'SI'
AVAL	ASJR	0.0466702	0.0280356	0.0863282	0.0269547	0.0292876	0.939	0.934	'SI'
IL1L	AVAL	0.0472519	0.0208108	0.081542	0.0269547	0.0292876	0.951	0.9515	'SI'
IL2DL	AVAL	0.0269239	0.0208108	0.081542	0.0269547	0.0292876	0.85	0.9515	'SI'
IL2DR	AVAL	0.0472519	0.0208108	0.081542	0.0269547	0.0292876	0.951	0.934	'SI'
IL2L	AVAL	0.0472519	0.0208108	0.081542	0.0269547	0.0292876	0.942	0.934	'SI'
IL2R	AVAL	0.0472519	0.0208108	0.081542	0.0269547	0.0292876	0.951	0.9515	'SI'
URAVR	AVAL	0.0427381	0.0208108	0.081542	0.0269547	0.0292876	0.9385	0.934	'SI'
URBL	AVAL	0.0472519	0.0208108	0.081542	0.0269547	0.0292876	0.941	0.934	'SI'
URXL	AVAL	0.0472519	0.0208108	0.081542	0.0269547	0.0292876	0.951	0.9515	'SI'
URYVL	AVAL	0.0472519	0.0208108	0.081542	0.0269547	0.0292876	0.951	0.934	'SI'
IL2VR	AVAL	0.0472519	0.0208108	0.079361	0.0269547	0.0292876	0.951	0.934	'SI'
AVAL	AVKL	0.0427381	0.0208108	0.0822276	0.0269547	0.0292876	0.9265	0.934	'II'
AVAL	AVKR	0.0427381	0.0208108	0.0822276	0.0269547	0.0292876	0.9165	0.934	'II'
AVAL	AWAL	0.0466702	0.0208108	0.081542	0.0269547	0.0292876	0.939	0.934	'SI'
AVAL	AWBR	0.0466702	0.0208108	0.079361	0.0269547	0.0292876	0.9395	0.9515	'SI'
AVAL	AWCL	0.0466702	0.0208108	0.081542	0.0269547	0.0292876	0.9395	0.9515	'SI'
AVAL	HSNL	0.0466702	0.0186994	0.0822276	0.0269547	0.0292876	0.9495	0.934	'MI'
AVAL	PLNR	0.0427381	0.0208108	0.081542	0.0269547	0.0292876	0.9265	0.9515	'SI'
AVAL	RMGL	0.0472519	0.0208108	0.081542	0.0269547	0.0292876	0.951	0.935	'MI'
AVAL	SAADL	0.0249056	0.0208108	0.081542	0.0269547	0.0292876	0.8	0.934	'II'
AVAL	SAADR	0.0472519	0.0208108	0.0822276	0.0305845	0.0292876	0.9235	0.9645	'II'
AVAL	SAAVR	0.0472519	0.0208108	0.0822276	0.0269547	0.0292876	0.9295	0.934	'II'
AVAL	SDQR	0.0472519	0.0208108	0.081542	0.0269547	0.0292876	0.941	0.934	'II'
AVAL	SIADR	0.0472519	0.0208108	0.081542	0.0269547	0.0292876	0.951	0.934	'II'
AVAL	SIAVL	0.0472519	0.0208108	0.081542	0.0269547	0.0292876	0.94	0.934	'II'
AVAL	SMBDR	0.0472519	0.0208108	0.081542	0.0269547	0.0292876	0.931	0.934	'MI'
RID	AVEL	0.0249503	0.00812384	0.0154383	0.0307554	0.0292876	0.85	0.9625	'MI'
DD03	VC04	0.0832633	0.0703784	0.0804268	0.02462	0.0274215	0.9525	0.943	'MM'
AIML	DD04	0.0332899	0.0584344	0.034194	0.0287115	0.0292897	0.85	0.9375	'MI'
SIBDR	DD04	0.0510319	0.0584344	0.0341347	0.0287115	0.0292897	0.936	0.94	'MI'
ADEL	DD04	0.0395328	0.0615803	0.0333602	0.0285082	0.0292897	0.9	0.9485	'MS'
RIMR	DD04	0.0619265	0.0710572	0.0268829	0.0285082	0.0292897	0.957	0.96	'MM'
AIML	FLPL	0.00725625	0.00812384	0.0154383	0.0287115	0.0292897	0.3	0.953	'SI'
SIBDR	FLPL	0.0139868	0.00812384	0.00816256	0.0287115	0.0292897	0.7	0.9555	'SI'
CEPDR	PVPL	0.025428	0.0143809	0.00816256	0.0314495	0.0292876	0.9	0.941	'SI'
CEPVR	PVPL	0.0203164	0.0143809	0.00816256	0.0314495	0.0292876	0.8	0.9545	'SI'
SIADL	PVPL	0.0203164	0.0143809	0.00816256	0.0290434	0.0292876	0.8	0.9305	'II'
RMDDL	AVDR	0.0141871	0.00812384	0.00816256	0.0314495	0.0292876	0.7	0.93	'MI'
RMDDL	AVFR	0.00750973	0.00812384	0.0147317	0.0277423	0.0292876	0.3	0.905	'MI'
RMDDL	DD01	0.0214079	0.0343877	0.0208583	0.0292301	0.0292876	0.85	0.9275	'MM'
RMDDL	RIFL	0.0144206	0.00728914	0.00776017	0.0314495	0.0292876	0.75	0.93	'MI'
RMDL	VD03	0.019732	0.0190635	0.0569927	0.0311149	0.0292876	0.8	0.9455	'MM'
RIAL	ADAL	0.0297028	0.00812384	0.0154354	0.0253363	0.0254717	0.906	0.924	'II'
RIAL	PHAR	0.0299634	0.00812384	0.0154354	0.0253363	0.0254717	0.9075	0.924	'SI'
ADAR	DD04	0.0500081	0.0639108	0.0268829	0.0209895	0.0225262	0.9335	0.9435	'MI'
HSNL	DD04	0.0780949	0.0499277	0.0268829	0.0209895	0.0225262	0.9815	0.92	'MM'
IL2VR	DD04	0.0400629	0.0639108	0.0268829	0.0209895	0.0225262	0.912	0.92	'MS'
SDQR	DD04	0.0462073	0.0639108	0.0268829	0.0209895	0.0225262	0.923	0.92	'MI'
SIAVL	DD04	0.0554225	0.0639108	0.0268829	0.0209895	0.0225262	0.9445	0.92	'MI'
OLQDR	DD04	0.0552629	0.0638679	0.0268829	0.0209895	0.0225262	0.9535	0.92	'MS'
RIAL	RMDDR	0.03459	0.0139273	0.0194921	0.0392284	0.0383429	0.9175	0.923	'MI'
AVAR	RMDR	0.0256834	0.0145538	0.0784408	0.0380893	0.0401465	0.85	0.9365	'MI'
AVAR	AVDR	0.0343107	0.0124502	0.0789019	0.0358942	0.0382805	0.9405	0.9295	'II'
AVAR	FLPL	0.0343107	0.0124502	0.0762933	0.0358942	0.0382805	0.9575	0.9305	'SI'
AVAR	RIFL	0.0353534	0.0133602	0.0769227	0.0304766	0.0382805	0.946	0.909	'II'
RMDDR	AS01	0.0132096	0.00728914	0.0150404	0.0311149	0.031553	0.6	0.9495	'MM'
RMDDR	AVDL	0.0213462	0.00812384	0.0154354	0.0311149	0.031553	0.9175	0.93	'MI'
RMDDR	AVL	0.012649	0.0133388	0.0209406	0.0311149	0.031553	0.55	0.936	'MM'
RMDDR	DA02	0.0190818	0.0133388	0.0150404	0.0311149	0.031553	0.8	0.9495	'MM'
RMDDR	DA03	0.0134413	0.00746157	0.0150404	0.0311149	0.031553	0.65	0.9495	'MM'
RMDDR	DVB	0.0139868	0.00812384	0.0209406	0.0311149	0.031553	0.7	0.9495	'MM'
RMDDR	FLPR	0.0139868	0.00812384	0.0154354	0.0311149	0.031553	0.7	0.9495	'MS'
RMDDR	VA01	0.0132096	0.00728914	0.0150431	0.0311149	0.031553	0.6	0.9495	'MM'
RMDDR	VA08	0.0193454	0.00746157	0.0205529	0.0311149	0.031553	0.8	0.936	'MM'
RMDDR	VA11	0.0139868	0.00812384	0.0154354	0.0311149	0.031553	0.7	0.9495	'MM'
RMDDR	VB01	0.0132096	0.00728914	0.0150404	0.0311149	0.031553	0.6	0.9495	'MM'
RMDDR	VB02	0.0185485	0.00728914	0.0274257	0.0311149	0.031553	0.8	0.9495	'MM'
RMDDR	VB08	0.012649	0.00812384	0.00816256	0.0311149	0.031553	0.55	0.9495	'MM'
RMDDR	VC05	0.0134413	0.014703	0.0154354	0.0311149	0.031553	0.65	0.936	'MM'
RMDDR	VD07	0.0187908	0.00746157	0.00816256	0.0311149	0.031553	0.8	0.9495	'MM'
RMDDR	VD10	0.040172	0.00812384	0.0220001	0.0310668	0.031553	0.9375	0.9495	'MM'
RMDDR	VD13	0.0213462	0.00812384	0.0220001	0.0311149	0.031553	0.85	0.9495	'MM'
RMDVR	AVBL	0.027593	0.0206714	0.0226994	0.0323413	0.0315642	0.85	0.962	'MI'
VD02	PVR	0.0447048	0.0620712	0.0325723	0.0248278	0.0315642	0.947	0.9495	'MS'
SAAVL	VD02	0.0500791	0.0624735	0.0329118	0.0248278	0.0315642	0.97	0.9495	'MI'
VD02	VD05	0.0436282	0.0688791	0.0303841	0.0229639	0.0296957	0.9265	0.939	'MM'
RIAR	AVDR	0.0195882	0.0153576	0.0154354	0.0311149	0.031553	0.85	0.9285	'II'
RMDL	PVPR	0.0322942	0.00746157	0.00776017	0.0311149	0.031553	0.943	0.9385	'MI'
RIAR	RIFL	0.0132096	0.0145306	0.0205529	0.0311149	0.031553	0.6	0.9285	'II'
RMDL	VD01	0.0520624	0.0573853	0.0143165	0.0311149	0.031553	0.946	0.9385	'MM'
RMEV	VD01	0.0633995	0.0573853	0.0143165	0.0311149	0.031553	0.9555	0.936	'MM'
RIBL	AVBL	0.0353505	0.0142149	0.0147255	0.0311149	0.031553	0.91	0.9445	'II'
RIAR	AVBL	0.0321187	0.0214409	0.0147255	0.0311149	0.031553	0.9275	0.9255	'II'
VD01	PVT	0.0466889	0.0549305	0.0143165	0.0311149	0.031553	0.934	0.956	'MI'
SIADL	VC03	0.0224716	0.023508	0.0215894	0.0311149	0.031553	0.85	0.9355	'MI'
AWBL	VD01	0.0463995	0.0549305	0.0216066	0.0311149	0.031553	0.931	0.956	'MS'
AIYR	VD01	0.0515024	0.0549305	0.0143165	0.0311149	0.031553	0.9205	0.956	'MI'
ASER	VD01	0.0461345	0.0549305	0.0143165	0.0311149	0.031553	0.9175	0.971	'MS'
AUAL	VD01	0.0466889	0.0549305	0.0143165	0.0311149	0.031553	0.933	0.956	'MS'
AWAR	VD01	0.0461345	0.0549305	0.0143165	0.0311149	0.031553	0.9315	0.971	'MS'
AWCR	VD01	0.0421944	0.0549305	0.0143165	0.0311149	0.031553	0.918	0.956	'MS'
IL1DL	VD01	0.0466889	0.0549305	0.0143165	0.0311149	0.031553	0.933	0.956	'MS'
IL1DR	VD01	0.0466889	0.0549305	0.0143165	0.0311149	0.031553	0.933	0.956	'MS'
IL1VL	VD01	0.0520624	0.0549305	0.0143165	0.0311149	0.031553	0.955	0.956	'MS'
RIH	VD01	0.0463995	0.0549305	0.0143165	0.0311149	0.031553	0.931	0.946	'MI'
RMED	VD01	0.0520624	0.0549305	0.0143165	0.0311149	0.031553	0.946	0.9445	'MM'
RMER	VD01	0.0520624	0.0549305	0.0143165	0.0311149	0.031553	0.955	0.9495	'MM'
RMGR	VD01	0.0515489	0.0549305	0.0143165	0.0311149	0.031553	0.945	0.956	'MM'
URADL	VD01	0.0463995	0.0549305	0.0143165	0.0311149	0.031553	0.932	0.956	'MS'
URAVL	VD01	0.0520624	0.0549305	0.0143165	0.0311149	0.031553	0.955	0.956	'MS'
URBR	VD01	0.0520624	0.0549305	0.0143165	0.0311149	0.031553	0.946	0.956	'MS'
URYDL	VD01	0.0463995	0.0549305	0.0143165	0.0311149	0.031553	0.9215	0.956	'MS'
SMDDR	SMBVL	0.0634546	0.00669032	0.00670825	0.0236323	0.0252026	0.938	0.9725	'MM'
AVAR	AVJR	0.029747	0.0124502	0.0817546	0.0383384	0.042937	0.917	0.923	'II'
CEPDR	RIBR	0.00629055	0.0131157	0.00670825	0.0293881	0.0327221	0.25	0.929	'SI'
RMDDL	RMHL	0.00629055	0.00669032	0.013984	0.0311681	0.0327221	0.25	0.918	'MM'
RMDDL	AVBR	0.0201228	0.0283102	0.00816256	0.0328465	0.0343918	0.85	0.9155	'MI'
URADR	AVBR	0.0201228	0.0283102	0.00816256	0.0328465	0.0343918	0.8	0.952	'SI'
RMDDL	DVC	0.0355414	0.0248273	0.0274949	0.0328465	0.0343918	0.9845	0.9155	'MI'
AVBR	RIMR	0.0267726	0.0310949	0.00816256	0.0328465	0.0343918	0.9135	0.9615	'MI'
AIBL	ADAL	0.00725625	0.0153576	0.00816256	0.017792	0.0217595	0.3	0.965	'II'
AIBL	AVDL	0.0136209	0.0153576	0.00816256	0.017792	0.0217595	0.65	0.9175	'II'
AIBL	AVL	0.0176934	0.0205727	0.00816256	0.017792	0.0217595	0.8	0.9315	'MI'
AIBL	DVA	0.028464	0.0329384	0.0226994	0.017792	0.0217595	0.9	0.965	'II'
AIBL	HSNR	0.0115375	0.0153576	0.00816256	0.017792	0.0217595	0.45	0.9315	'MI'
AIBL	PVNL	0.0136209	0.0256197	0.0154354	0.017792	0.0217595	0.65	0.915	'II'
AIBL	VC04	0.0192696	0.014703	0.00776017	0.017792	0.0217595	0.85	0.9315	'MI'
AIBL	VD04	0.0232865	0.0496912	0.0143165	0.017792	0.0217595	0.85	0.9315	'MI'
AIAR	DA02	0.0607015	0.0475114	0.0298487	0.0204004	0.0217623	0.9875	0.9785	'MI'
AIAR	PVCR	0.0702633	0.0454884	0.0374487	0.0204004	0.0217623	0.998	0.9785	'II'
AIAR	VA03	0.0736961	0.044701	0.0298487	0.0173042	0.0217623	0.9985	0.9595	'MI'
AIAR	VD06	0.0881963	0.059227	0.0409364	0.0204004	0.0217623	0.995	0.9785	'MI'
AVJR	AINR	0.0136209	0.00812384	0.0154354	0.0253363	0.026873	0.65	0.936	'II'
AVJR	AIYL	0.0202248	0.00812384	0.0154354	0.0253363	0.026873	0.85	0.955	'II'
AVJR	AIZL	0.0187198	0.00812384	0.0209406	0.0253363	0.026873	0.8	0.955	'II'
AVJR	ALMR	0.0121503	0.00601571	0.0133455	0.0253115	0.026873	0.45	0.955	'SI'
AVJR	ALNL	0.0141871	0.00812384	0.0154354	0.0253363	0.026873	0.7	0.955	'SI'
AVJR	ASJR	0.0136209	0.00812384	0.0209406	0.0253115	0.026873	0.65	0.936	'SI'
CEPDL	AVJR	0.0141871	0.00812384	0.0209406	0.0253363	0.026873	0.7	0.936	'SI'
ADLR	AVJR	0.0136209	0.00812384	0.0154354	0.0253115	0.026873	0.65	0.936	'SI'
ASEL	AVJR	0.0136209	0.00812384	0.0154354	0.0253363	0.026873	0.65	0.936	'SI'
AWAL	AVJR	0.0136209	0.00812384	0.0154354	0.0253115	0.026873	0.65	0.936	'SI'
AWCL	AVJR	0.0136209	0.00812384	0.0154354	0.0253115	0.026873	0.65	0.955	'SI'
IL1L	AVJR	0.0141871	0.00812384	0.0154354	0.0253363	0.026873	0.7	0.955	'SI'
IL2DL	AVJR	0.0141871	0.00812384	0.0154354	0.0253115	0.026873	0.7	0.955	'SI'
IL2DR	AVJR	0.0141871	0.00812384	0.0154354	0.0253115	0.026873	0.7	0.936	'SI'
IL2L	AVJR	0.0141871	0.00812384	0.0154354	0.0253363	0.026873	0.7	0.936	'SI'
IL2R	AVJR	0.0141871	0.00812384	0.0154354	0.0253115	0.026873	0.7	0.955	'SI'
IL2VR	AVJR	0.0141871	0.00812384	0.0154354	0.0253115	0.026873	0.7	0.936	'SI'
OLQVL	AVJR	0.0141871	0.00812384	0.0154354	0.0253115	0.026873	0.7	0.936	'SI'
SAADL	AVJR	0.0141871	0.00812384	0.0154354	0.0253115	0.026873	0.7	0.936	'II'
SAAVR	AVJR	0.0372646	0.00812384	0.0154354	0.0253115	0.026873	0.9625	0.936	'II'
URAVR	AVJR	0.0141871	0.00812384	0.0154354	0.0253363	0.026873	0.7	0.936	'SI'
URXL	AVJR	0.0141871	0.00812384	0.0154354	0.0253363	0.026873	0.7	0.955	'SI'
URYVL	AVJR	0.0141871	0.00812384	0.0154354	0.0253115	0.026873	0.7	0.936	'SI'
AVJR	DD06	0.0183352	0.0180014	0.0133455	0.0253363	0.026873	0.8	0.9225	'MI'
AVJR	HSNL	0.02452	0.00601571	0.0154354	0.0253363	0.026873	0.948	0.936	'MI'
AVJR	PLNR	0.0141871	0.00812384	0.0154354	0.0253115	0.026873	0.7	0.955	'SI'
AVJR	RIGR	0.0203659	0.00812384	0.0154354	0.0253363	0.026873	0.8	0.9365	'II'
AVJR	RMFR	0.0141871	0.00812384	0.0154354	0.0253363	0.026873	0.7	0.936	'MI'
AVJR	SDQR	0.0141871	0.00812384	0.0154354	0.0253115	0.026873	0.7	0.936	'II'
AVJR	SIADR	0.0141871	0.00812384	0.0154354	0.0253363	0.026873	0.7	0.936	'II'
AVJR	SIAVL	0.0141871	0.00812384	0.0154354	0.0253115	0.026873	0.7	0.936	'II'
AVJR	SMBDR	0.0141871	0.00812384	0.0154354	0.0253363	0.026873	0.7	0.936	'MI'
AVJR	SMBVL	0.0257296	0.00812384	0.0154354	0.0253363	0.026873	0.9565	0.955	'MI'
VB02	VD03	0.0168427	0.0160433	0.0593364	0.0193246	0.0250113	0.75	0.923	'MM'
PVPL	PVNL	0.0182701	0.0249421	0.0133455	0.0234762	0.0250044	0.8	0.916	'II'
VD04	PVPL	0.0417728	0.042114	0.0139944	0.0234762	0.0250044	0.931	0.9265	'MI'
AS01	PVPL	0.0327708	0.0132104	0.00744529	0.0234762	0.0250044	0.9315	0.9455	'MI'
VC04	PVPL	0.02462	0.0133617	0.00744529	0.0234762	0.0250044	0.85	0.9265	'MI'
AVDL	PVPL	0.0182701	0.012265	0.00607563	0.0234762	0.0250044	0.8	0.9175	'II'
AVL	PVPL	0.0238489	0.0234919	0.00607563	0.0234762	0.0250044	0.85	0.9265	'MI'
HSNR	PVPL	0.0197502	0.0194877	0.00607563	0.0234762	0.0250044	0.8	0.9265	'MI'
URADL	AVER	0.0137066	0.0131157	0.0195031	0.0289128	0.0336912	0.65	0.943	'SI'
RIVR	DD03	0.0902389	0.0743783	0.0856154	0.0211937	0.0306856	0.9505	0.921	'MM'
URADL	DD03	0.0842827	0.0743783	0.0748703	0.0248278	0.0306856	0.9535	0.943	'MS'
AVER	ADLR	0.0189956	0.0131157	0.0139867	0.0252875	0.0298937	0.75	0.9255	'SI'
AVER	AIZL	0.00750973	0.0131157	0.0139867	0.0289128	0.0298937	0.35	0.959	'II'
AVER	ASJR	0.0141309	0.0203481	0.0195031	0.0289128	0.0298937	0.65	0.943	'SI'
SAAVR	AVER	0.0324921	0.0131157	0.020556	0.0252875	0.0298937	0.85	0.9255	'II'
AVER	AVKL	0.0383276	0.0203511	0.0139867	0.0252875	0.0298937	0.9305	0.9255	'II'
AVER	AVKR	0.0177925	0.0131157	0.0139867	0.0252875	0.0298937	0.75	0.9255	'II'
AVER	AWBR	0.0189956	0.0131157	0.0139867	0.0289128	0.0298937	0.75	0.959	'SI'
AVER	AWCL	0.0141309	0.0131157	0.0139867	0.0252875	0.0298937	0.65	0.9435	'SI'
AVER	PLNR	0.0177925	0.0131157	0.0139867	0.0252875	0.0298937	0.75	0.9435	'SI'
AVER	RMGL	0.0292684	0.0131157	0.0195031	0.0252875	0.0298937	0.9	0.9265	'MI'
AVER	SAADL	0.01292	0.0131157	0.0139867	0.0252875	0.0298937	0.6	0.9255	'II'
AVER	SAADR	0.0324921	0.0131157	0.020556	0.0252875	0.0298937	0.85	0.9435	'II'
AVER	SDQR	0.01292	0.0131157	0.0139867	0.0252875	0.0298937	0.6	0.9255	'II'
AVER	SMBDR	0.01292	0.0131157	0.0139867	0.0252875	0.0298937	0.6	0.9255	'MI'
AVER	SMBVL	0.0220064	0.0131157	0.0195031	0.0252875	0.0298937	0.8	0.9435	'MI'
AVER	SMBVR	0.0177925	0.0131157	0.0139867	0.0252875	0.0298937	0.75	0.9255	'MI'
RMDVR	AVAR	0.0254785	0.0145538	0.0839054	0.037764	0.0434276	0.8	0.928	'MI'
ASKR	VD03	0.0191803	0.0263005	0.0696923	0.0211937	0.0268793	0.8	0.915	'MS'
RMDVL	CEPDR	0.0198226	0.00669032	0.00670825	0.0369384	0.0373937	0.85	0.927	'MS'
AS01	VD02	0.0354996	0.0570705	0.0238772	0.0229639	0.0274215	0.9165	0.939	'MM'
AVL	DVA	0.0270649	0.0202446	0.0133485	0.0159329	0.0181533	0.85	0.948	'MI'
VD01	PVPL	0.0544186	0.0631159	0.0212644	0.0343645	0.0340398	0.934	0.9405	'MI'
VC03	PVPL	0.046667	0.0293095	0.0212644	0.0343645	0.0340398	0.947	0.9405	'MI'
PVPR	PVPL	0.0277174	0.00712585	0.0147226	0.0343645	0.0340398	0.85	0.9405	'II'
VD03	PVPR	0.0189119	0.015277	0.0598196	0.0343645	0.0340398	0.8	0.9435	'MI'
VD03	VC03	0.0340527	0.0339993	0.0635893	0.0343645	0.0340398	0.9	0.9435	'MM'
AVKR	AVKL	0.0247021	0.00669032	0.00670825	0.0142843	0.0181179	0.85	0.85	'II'
RMDVR	DD03	0.0983149	0.0809948	0.0824013	0.0305873	0.0359279	0.954	0.9465	'MM'
AVER	VD05	0.020012	0.0201206	0.0150431	0.0269576	0.0315642	0.75	0.9515	'MI'
AVER	VD08	0.0478063	0.0254798	0.0216066	0.0269576	0.0315642	0.944	0.9345	'MI'
SAAVL	VD06	0.0278147	0.0528581	0.0232122	0.0173042	0.0217623	0.905	0.994	'MI'
VB02	VD05	0.012376	0.018927	0.00526433	0.015441	0.0198949	0.55	0.987	'MM'
RMDL	ADAL	0.0139868	0.00812384	0.00816256	0.017792	0.0217595	0.7	0.9225	'MI'
AVJL	ADAR	0.0134411	0.0201493	0.00816256	0.017792	0.0217595	0.65	0.936	'II'
AVJL	AINR	0.00725625	0.0201493	0.00816256	0.017792	0.0217595	0.3	0.907	'II'
AVJL	AIYL	0.0134411	0.0201493	0.0154354	0.017792	0.0217595	0.65	0.936	'II'
AVJL	AIZL	0.0136209	0.0201493	0.0154354	0.017792	0.0217595	0.65	0.936	'II'
AVJL	ALMR	0.0119654	0.0180014	0.00607563	0.017792	0.0217595	0.45	0.936	'SI'
AVJL	ALNL	0.0139868	0.0201493	0.00816256	0.017792	0.0217595	0.7	0.936	'SI'
RMDL	AS01	0.0247031	0.00728914	0.00776017	0.017792	0.0217595	0.924	0.9225	'MM'
RMDL	AS02	0.0132096	0.00728914	0.00776017	0.017792	0.0217595	0.6	0.9225	'MM'
RMDL	AS04	0.0249348	0.00746157	0.00776017	0.017792	0.0217595	0.925	0.9225	'MM'
RMDL	AS05	0.0249348	0.00746157	0.00776017	0.017792	0.0217595	0.925	0.9225	'MM'
RMDL	AS06	0.0249348	0.00746157	0.00776017	0.017792	0.0217595	0.924	0.9225	'MM'
RMDL	AS07	0.0308601	0.00812384	0.00816256	0.017792	0.0217595	0.98	0.9225	'MM'
RMDL	AS09	0.0308762	0.00812384	0.00816256	0.017792	0.0217595	0.963	0.9225	'MM'
RMDL	AS10	0.0363969	0.00812384	0.00816256	0.017792	0.0217595	0.991	0.9225	'MM'
AVJL	ASJR	0.0134411	0.0201493	0.00816256	0.017792	0.0217595	0.65	0.907	'SI'
RMDL	AVDL	0.0254803	0.00812384	0.00816256	0.017792	0.0217595	0.956	0.85	'MI'
RMDL	AVG	0.0254803	0.00812384	0.00816256	0.017792	0.0217595	0.928	0.85	'MS'
OLQDR	AVJL	0.00780798	0.0201493	0.0209406	0.017792	0.0217595	0.3	0.907	'SI'
URYVL	AVJL	0.00780798	0.0201493	0.0203424	0.017792	0.0217595	0.3	0.907	'SI'
CEPDL	AVJL	0.0139868	0.0201493	0.0154383	0.017792	0.0217595	0.7	0.907	'SI'
SAAVR	AVJL	0.0372646	0.0201493	0.0154354	0.017792	0.0217595	0.963	0.907	'II'
ASEL	AVJL	0.0134411	0.0201493	0.00816256	0.017792	0.0217595	0.65	0.907	'SI'
AWAL	AVJL	0.0134411	0.0201493	0.00816256	0.017792	0.0217595	0.65	0.907	'SI'
AWCL	AVJL	0.0134411	0.0201493	0.00816256	0.017792	0.0217595	0.65	0.936	'SI'
IL1L	AVJL	0.00780798	0.0201493	0.00816256	0.017792	0.0217595	0.3	0.936	'SI'
IL2DL	AVJL	0.0139868	0.0201493	0.00816256	0.017792	0.0217595	0.7	0.936	'SI'
IL2DR	AVJL	0.0139868	0.0201493	0.00816256	0.017792	0.0217595	0.7	0.907	'SI'
IL2L	AVJL	0.0139868	0.0201493	0.00816256	0.017792	0.0217595	0.7	0.907	'SI'
IL2R	AVJL	0.0139868	0.0201493	0.00816256	0.017792	0.0217595	0.7	0.936	'SI'
IL2VR	AVJL	0.0139868	0.0201493	0.00816256	0.017792	0.0217595	0.7	0.907	'SI'
OLQVL	AVJL	0.0139868	0.0201493	0.00816256	0.017792	0.0217595	0.7	0.907	'SI'
SAADL	AVJL	0.00780798	0.0201493	0.00816256	0.017792	0.0217595	0.3	0.907	'II'
URAVR	AVJL	0.0139868	0.0201493	0.00816256	0.017792	0.0217595	0.7	0.907	'SI'
URBL	AVJL	0.013209	0.0201493	0.00816256	0.017792	0.0217595	0.6	0.907	'SI'
URXL	AVJL	0.0139868	0.0201493	0.00816256	0.017792	0.0217595	0.7	0.936	'SI'
RMEV	AVL	0.0179515	0.0197121	0.00816256	0.0253363	0.0217595	0.8	0.9475	'MM'
RMDL	DA01	0.0400195	0.0242854	0.00816256	0.017792	0.0217595	0.944	0.9225	'MM'
RMDL	DA02	0.0378133	0.0133388	0.00776017	0.0136657	0.0217595	0.9575	0.85	'MM'
RMDL	DA09	0.0313752	0.00812384	0.00816256	0.017792	0.0217595	0.9815	0.9225	'MM'
RMDL	DB03	0.0249348	0.00746157	0.00776017	0.017792	0.0217595	0.925	0.9225	'MM'
RMDL	DB04	0.0249348	0.00746157	0.00776017	0.017792	0.0217595	0.924	0.9225	'MM'
RMDL	DB05	0.0254803	0.00812384	0.00816256	0.017792	0.0217595	0.956	0.9225	'MM'
RMDL	DB06	0.0139868	0.00812384	0.00816256	0.017792	0.0217595	0.7	0.9225	'MM'
RMDL	DB07	0.0254803	0.00812384	0.00816256	0.017792	0.0217595	0.956	0.9225	'MM'
AVJL	DD06	0.017274	0.0180014	0.0133455	0.017792	0.0217595	0.8	0.85	'MI'
RMDL	DVA	0.0646265	0.0329384	0.0220085	0.017792	0.0217595	0.9905	0.9225	'MI'
RMDL	DVB	0.0445823	0.00812384	0.0147255	0.017792	0.0217595	0.991	0.9225	'MM'
AVJL	HSNL	0.0134411	0.0161885	0.00816256	0.017792	0.0217595	0.65	0.907	'MI'
RMDL	HSNR	0.025152	0.0153576	0.00816256	0.017792	0.0217595	0.9245	0.85	'MM'
RMDL	PDA	0.0254803	0.00812384	0.00816256	0.017792	0.0217595	0.956	0.9225	'MM'
RMDL	PDER	0.0241425	0.0290225	0.00816256	0.023935	0.0217595	0.9205	0.964	'MS'
RMDL	PHAL	0.0213568	0.00812384	0.00816256	0.017792	0.0217595	0.9175	0.9225	'MS'
RMDL	PHAR	0.0254803	0.00812384	0.00816256	0.017792	0.0217595	0.956	0.9225	'MS'
RMDL	PHBR	0.0328397	0.00812384	0.00816256	0.017792	0.0217595	0.985	0.9225	'MS'
RMDL	PHCR	0.0139868	0.00812384	0.00816256	0.017792	0.0217595	0.7	0.9225	'MS'
RMDL	PLML	0.0254803	0.0153576	0.00816256	0.017792	0.0217595	0.956	0.9225	'MS'
AVJL	PLNR	0.00780798	0.0201493	0.00816256	0.017792	0.0217595	0.3	0.936	'SI'
RMDL	PVNL	0.0260637	0.0234039	0.0154354	0.017792	0.0217595	0.9595	0.85	'MI'
RMDL	PVNR	0.0254803	0.0208234	0.0154354	0.017792	0.0217595	0.956	0.9225	'MI'
RMDL	PVWR	0.029665	0.00812384	0.00816256	0.017792	0.0217595	0.9765	0.9225	'MI'
RMDL	RIFR	0.025152	0.00812384	0.00816256	0.017792	0.0217595	0.9245	0.9225	'MI'
AVJL	RIGR	0.0209	0.027347	0.0154354	0.017792	0.0217595	0.85	0.908	'II'
ALA	RMDL	0.0328397	0.00812384	0.00816256	0.017792	0.0217595	0.985	0.9225	'MI'
AVJL	RMFR	0.00780798	0.0201493	0.00816256	0.017792	0.0217595	0.3	0.907	'MI'
AVJL	RMGL	0.0144353	0.0201493	0.0154383	0.017792	0.0217595	0.75	0.908	'MI'
RMDL	SABVL	0.0247031	0.00728914	0.00816256	0.017792	0.0217595	0.923	0.9225	'MI'
RMDL	SDQL	0.0254803	0.00812384	0.00816256	0.017792	0.0217595	0.956	0.9225	'MI'
AVJL	SIADR	0.00780798	0.0201493	0.00816256	0.017792	0.0217595	0.3	0.907	'II'
AVJL	SIAVL	0.00780798	0.0201493	0.0154354	0.017792	0.0217595	0.3	0.907	'II'
AVJL	SMBDR	0.0139868	0.0201493	0.00816256	0.017792	0.0217595	0.65	0.907	'MI'
AVJL	SMBVR	0.0139868	0.0201493	0.00816256	0.017792	0.0217595	0.7	0.907	'MI'
RMDL	VA01	0.0326305	0.00728914	0.00776017	0.0136657	0.0217595	0.954	0.85	'MM'
RMDL	VA12	0.0254803	0.00812384	0.00816256	0.017792	0.0217595	0.956	0.9225	'MM'
RMDL	VB01	0.0132096	0.00728914	0.00776017	0.017792	0.0217595	0.6	0.9225	'MM'
RMEV	VB01	0.0227959	0.0136914	0.00776017	0.023935	0.0217595	0.85	0.9605	'MM'
RMDL	VB06	0.0371125	0.00746157	0.00776017	0.017792	0.0217595	0.9805	0.9225	'MM'
RMDL	VB07	0.0328397	0.00812384	0.00776017	0.017792	0.0217595	0.985	0.9225	'MM'
RMDL	VC04	0.0249348	0.0136907	0.00776017	0.017792	0.0217595	0.925	0.85	'MM'
RMDL	VC05	0.0249348	0.00746157	0.00816256	0.017792	0.0217595	0.924	0.85	'MM'
RMEV	VC05	0.0229973	0.0211285	0.00816256	0.023935	0.0217595	0.85	0.94	'MM'
RMDL	VD04	0.0356766	0.0394242	0.0143165	0.017792	0.0217595	0.9355	0.85	'MM'
RMEV	VD04	0.0278351	0.0423569	0.0143165	0.017792	0.0217595	0.85	0.85	'MM'
RMDL	VD09	0.0446912	0.00812384	0.00816256	0.023935	0.0217595	0.985	0.964	'MM'
RMDL	VD10	0.0455251	0.0217862	0.0220001	0.017792	0.0217595	0.9535	0.9225	'MM'
RMDL	VD11	0.0254803	0.00812384	0.00816256	0.017792	0.0217595	0.956	0.9225	'MM'
CEPDL	AVBL	0.0201228	0.0142149	0.0220085	0.017792	0.0217595	0.8	0.907	'SI'
SAADL	AVBL	0.0201228	0.0142149	0.0154354	0.017792	0.0217595	0.8	0.907	'II'
OLQVL	AVBL	0.0252343	0.0142149	0.0147255	0.017792	0.0217595	0.9	0.907	'SI'
SAAVR	AVBL	0.0201228	0.0142149	0.00816256	0.017792	0.0217595	0.8	0.907	'II'
SIBVR	AVL	0.0118712	0.0133388	0.00816256	0.0136657	0.0217595	0.45	0.8	'MI'
SIBVR	HSNR	0.0136885	0.0153576	0.00816256	0.017792	0.0217595	0.65	0.85	'MI'
CEPVR	PVNL	0.0139868	0.0208234	0.0154354	0.017792	0.0217595	0.7	0.9	'SI'
SIADL	PVNL	0.00780798	0.0208234	0.0154354	0.017792	0.0217595	0.3	0.85	'II'
SIBVR	VD04	0.029488	0.0394242	0.0143165	0.017792	0.0217595	0.9	0.85	'MI'
VD03	VA08	0.0210246	0.0216245	0.0477785	0.015441	0.0246163	0.8	0.85	'MM'
AVAL	ADEL	0.049209	0.0269206	0.0841706	0.0305845	0.0350516	0.946	0.9395	'SI'
AVAL	AIML	0.0356182	0.0208108	0.0843161	0.0382841	0.0350516	0.85	0.9545	'II'
URADR	AVAL	0.0472519	0.0208108	0.081542	0.0344639	0.0350516	0.941	0.953	'SI'
AVAL	AVHL	0.0466702	0.0186994	0.0793908	0.0269547	0.0350516	0.939	0.934	'II'
AVAL	SIBDR	0.0472519	0.0208108	0.081542	0.0382841	0.0350516	0.941	0.9565	'II'
VA01	VA03	0.0103885	0.00432504	0.00526433	0.0117982	0.0179324	0.4	0.9415	'MM'
VD06	VA09	0.0421075	0.017789	0.0252849	0.015441	0.0179324	0.941	0.987	'MM'
DA02	VD06	0.0335474	0.0515966	0.0206729	0.015441	0.0179324	0.9	0.987	'MM'
VA01	VD06	0.0276574	0.0368366	0.0206729	0.0117982	0.0179324	0.85	0.9415	'MM'
VA03	VD06	0.026784	0.0380715	0.0206729	0.015441	0.0179324	0.85	0.987	'MM'
PDER	VD10	0.0279021	0.00601571	0.0753201	0.0140787	0.0179324	0.85	0.9775	'MS'
AVDL	RIGL	0.0209	0.0153576	0.00816256	0.023935	0.0254717	0.85	0.9175	'II'
ASKR	VA08	0.0120906	0.014703	0.00776017	0.0136657	0.0197949	0.45	0.85	'MS'
AIZL	VD05	0.0242881	0.0136907	0.0150431	0.0136657	0.0197949	0.85	0.973	'MI'
AVKL	VD05	0.0439385	0.0209427	0.00776017	0.0173042	0.0197949	0.9715	0.9595	'MI'
SAADL	VD05	0.0248576	0.0136907	0.00776017	0.0136657	0.0197949	0.906	0.9145	'MI'
SAADR	VD05	0.0248908	0.0136907	0.00776017	0.0136657	0.0197949	0.85	0.973	'MI'
RMDR	DVA	0.0673005	0.0329384	0.0275294	0.0239187	0.0235165	0.982	0.9795	'MI'
VB05	DD04	0.0450526	0.0605708	0.0399448	0.0229631	0.0216489	0.9195	0.9555	'MM'
VD06	DD04	0.0657802	0.073212	0.033551	0.0229631	0.0216489	0.944	0.9555	'MM'
VC01	DD04	0.0594397	0.045953	0.0276539	0.0234762	0.0216489	0.9535	0.958	'MM'
VB02	DD04	0.071998	0.059035	0.0276539	0.0260593	0.0216489	0.964	0.969	'MM'
HSNR	DD04	0.0609989	0.0706517	0.0265396	0.0234762	0.0216489	0.9555	0.9375	'MM'
DA02	DD04	0.0789629	0.0621534	0.0243285	0.0216001	0.0216489	0.9685	0.9475	'MM'
VA01	DD04	0.050222	0.0639061	0.0243285	0.0193246	0.0216489	0.928	0.9315	'MM'
VA03	DD04	0.0628478	0.0546005	0.0243285	0.0260593	0.0216489	0.959	0.969	'MM'
VB04	DD04	0.0475945	0.0677059	0.0243285	0.0229631	0.0216489	0.927	0.9555	'MM'
DD04	SDQL	0.0446962	0.0706517	0.0265396	0.0234762	0.0216489	0.9275	0.958	'MI'
DD04	VA11	0.0397879	0.0519442	0.0265396	0.0266391	0.0216489	0.9	0.971	'MM'
DD04	VD10	0.0633521	0.0756148	0.0403108	0.0234762	0.0216489	0.9345	0.958	'MM'
AVBL	DVA	0.0462444	0.0331674	0.0206066	0.0250886	0.0216489	0.947	0.978	'II'
AVBL	HSNR	0.0195566	0.0193217	0.00607563	0.0220547	0.0216489	0.8	0.942	'MI'
AVBL	PDER	0.0241731	0.0387616	0.0133455	0.0192248	0.0216489	0.85	0.948	'SI'
AVBL	VB01	0.0190935	0.0130168	0.00744529	0.0234762	0.0216489	0.8	0.972	'MI'
VD03	DVA	0.0346976	0.0195959	0.063684	0.0170978	0.0245084	0.9075	0.9	'MI'
AQR	VD03	0.0157731	0.0187323	0.0560563	0.0140787	0.0245084	0.75	0.85	'MS'
AVL	VD03	0.0144353	0.0255266	0.050217	0.0170978	0.0245084	0.7	0.85	'MM'
AVAR	VD02	0.0631031	0.0361693	0.0345477	0.0383384	0.0429464	0.9665	0.9215	'MI'
VC04	HSNR	0.00671079	0.0143641	0.00744529	0.0145316	0.0178245	0.25	0.85	'MM'
AVAR	AVBR	0.00578054	0.0186994	0.0755917	0.0424904	0.042937	0.25	0.9325	'II'
ASKL	DD01	0.0229821	0.0280446	0.0281413	0.0136657	0.0235072	0.85	0.9145	'MS'
RMDDR	VC03	0.0286214	0.023508	0.0319307	0.0409045	0.0400104	0.9	0.9415	'MM'
URADL	VD02	0.0385977	0.0624735	0.0384397	0.0279196	0.0306856	0.928	0.9455	'MS'
IL1VR	RMDDL	0.00629055	0.00669032	0.00670825	0.0297754	0.0276171	0.25	0.9305	'MS'
IL2VL	RMDDL	0.0129117	0.00669032	0.00670825	0.0297754	0.0276171	0.55	0.9305	'MS'
RIPR	RMDDL	0.0177596	0.00669032	0.00670825	0.0297754	0.0276171	0.85	0.9305	'MI'
RMEL	RMDDL	0.00629055	0.00669032	0.00670825	0.0297754	0.0276171	0.25	0.9445	'MM'
RMEV	RMDL	0.0686671	0.0193963	0.00670825	0.0236573	0.0252026	0.996	0.9145	'MM'
CEPDR	RMDL	0.0313039	0.00669032	0.00670825	0.0236323	0.0252026	0.9815	0.9145	'MS'
CEPVR	RMDL	0.0239445	0.00669032	0.00670825	0.0236323	0.0252026	0.915	0.932	'MS'
RMED	RMDL	0.0754483	0.00669032	0.00670825	0.0236573	0.0252026	0.999	0.9255	'MM'
VD02	ALNL	0.0385977	0.0597343	0.0329118	0.0248278	0.0268793	0.9265	0.9495	'MS'
RMDVR	AS01	0.00706115	0.0136914	0.0150404	0.0211937	0.0268793	0.3	0.948	'MM'
RMDVR	AS04	0.0266593	0.0138915	0.0150404	0.0204004	0.0268793	0.85	0.9425	'MM'
RMDVR	AS05	0.00726252	0.0138915	0.0150404	0.0204004	0.0268793	0.3	0.9425	'MM'
RMDVR	AS06	0.00726252	0.0138915	0.0150404	0.0204004	0.0268793	0.3	0.9425	'MM'
RMDVR	AS07	0.0192893	0.0145538	0.0154354	0.0204004	0.0268793	0.8	0.9425	'MM'
RMDVR	AS08	0.0340479	0.0145538	0.0154354	0.0211937	0.0268793	0.9365	0.948	'MM'
RMDVR	AS10	0.00780798	0.0145538	0.0154354	0.0204004	0.0268793	0.35	0.9425	'MM'
RMDVR	DA01	0.0373586	0.0242854	0.00816256	0.0211937	0.0268793	0.85	0.948	'MM'
RMDVR	DA05	0.0187438	0.0138915	0.0150404	0.0211937	0.0268793	0.8	0.948	'MM'
RMDVR	DA06	0.0192893	0.0145538	0.0154354	0.0211937	0.0268793	0.8	0.948	'MM'
RMDVR	DB02	0.0333011	0.0136914	0.0150404	0.0204004	0.0268793	0.919	0.9425	'MM'
RMDVR	DB03	0.0309215	0.0138915	0.0150404	0.0211937	0.0268793	0.906	0.948	'MM'
RMDVR	DB04	0.0309547	0.0138915	0.0150404	0.0211937	0.0268793	0.9055	0.948	'MM'
RMDVR	DB05	0.0314389	0.0145538	0.0154354	0.0204004	0.0268793	0.9235	0.9425	'MM'
RMDVR	DB06	0.0340479	0.0145538	0.0154354	0.0211937	0.0268793	0.9365	0.948	'MM'
RMDVR	DB07	0.00780798	0.0145538	0.0154354	0.0211937	0.0268793	0.35	0.948	'MM'
RMDVR	LUAR	0.00780798	0.0145538	0.0154354	0.0211937	0.0268793	0.35	0.948	'MI'
RMDVR	PHAL	0.0192893	0.0145538	0.0154354	0.0204004	0.0268793	0.8	0.9425	'MS'
RMDVR	PHBL	0.0340479	0.0145538	0.0154354	0.0204004	0.0268793	0.9215	0.9425	'MS'
RMDVR	PHBR	0.0267053	0.0145538	0.0154354	0.0204004	0.0268793	0.85	0.9425	'MS'
VD02	PLNR	0.0385977	0.0536821	0.0329118	0.0248278	0.0268793	0.9265	0.9495	'MS'
RMDVR	PVCL	0.0199576	0.0145538	0.0154354	0.0211937	0.0268793	0.8	0.948	'MI'
RMDVR	PVCR	0.00780798	0.0145538	0.0154354	0.0211937	0.0268793	0.35	0.948	'MI'
RMDVR	PVDL	0.00780798	0.0145538	0.0154354	0.0204004	0.0268793	0.35	0.9425	'MI'
RMDVR	RIFR	0.00750973	0.0145538	0.0154354	0.0204004	0.0268793	0.3	0.9425	'MI'
RID	RMDVR	0.013753	0.0145538	0.00816256	0.0211937	0.0268793	0.65	0.948	'MM'
RMDVR	VA01	0.0376726	0.0136914	0.0150404	0.0204004	0.0268793	0.9275	0.9425	'MM'
RMDVR	VA03	0.00706115	0.0136914	0.0150404	0.0211937	0.0268793	0.3	0.948	'MM'
RMDVR	VA04	0.00726252	0.0138915	0.0150404	0.0204004	0.0268793	0.3	0.9425	'MM'
RMDVR	VA05	0.00726252	0.0138915	0.0150404	0.0211937	0.0268793	0.3	0.948	'MM'
RMDVR	VA06	0.0146786	0.0138915	0.0150404	0.0211937	0.0268793	0.7	0.948	'MM'
RMDVR	VA07	0.0187438	0.0138915	0.0150404	0.0204004	0.0268793	0.8	0.9425	'MM'
RMDVR	VA08	0.0241237	0.0138915	0.0150404	0.0269576	0.0268793	0.8	0.9565	'MM'
RMDVR	VA12	0.0340479	0.0145538	0.0154354	0.0211937	0.0268793	0.9365	0.948	'MM'
RMDVR	VB02	0.00706115	0.0136914	0.0219087	0.0211937	0.0268793	0.3	0.948	'MM'
RMDVR	VB04	0.0187438	0.0138915	0.0150404	0.0211937	0.0268793	0.8	0.948	'MM'
RMDVR	VB05	0.0309215	0.0138915	0.0216066	0.0211937	0.0268793	0.9055	0.948	'MM'
RMDVR	VB06	0.0187438	0.0138915	0.0150404	0.0211937	0.0268793	0.8	0.948	'MM'
RMDVR	VB07	0.00780798	0.0145538	0.0150404	0.0211937	0.0268793	0.35	0.948	'MM'
RMDVR	VC01	0.0185425	0.0136914	0.020564	0.0211937	0.0268793	0.75	0.948	'MM'
RMDVR	VC02	0.00726252	0.0138915	0.0150404	0.0211937	0.0268793	0.3	0.948	'MM'
RMDVR	VC04	0.0187438	0.0138915	0.0150404	0.0211937	0.0268793	0.8	0.925	'MM'
ADAR	VD02	0.038046	0.060855	0.0376671	0.0248278	0.0268793	0.926	0.9495	'MI'
SAADL	VD02	0.0351742	0.0624735	0.0376671	0.0248278	0.0268793	0.927	0.93	'MI'
URBL	VD02	0.0385977	0.0564546	0.0376671	0.0248278	0.0268793	0.928	0.93	'MS'
ADLR	VD02	0.038046	0.060855	0.0329118	0.0248278	0.0268793	0.926	0.93	'MS'
AINR	VD02	0.038046	0.060855	0.0329118	0.0248278	0.0268793	0.9385	0.93	'MI'
ASEL	VD02	0.038046	0.0597343	0.0329118	0.0248278	0.0268793	0.926	0.93	'MS'
AWAL	VD02	0.0317838	0.0504275	0.0329118	0.0248278	0.0268793	0.85	0.93	'MS'
AWCL	VD02	0.038046	0.0536821	0.0329118	0.0248278	0.0268793	0.926	0.9495	'MS'
IL2DR	VD02	0.0323355	0.0624735	0.0329118	0.0248278	0.0268793	0.9135	0.93	'MS'
IL2L	VD02	0.0385977	0.0536821	0.0329118	0.0248278	0.0268793	0.9295	0.93	'MS'
IL2R	VD02	0.0385977	0.0504275	0.0329118	0.0248278	0.0268793	0.9405	0.9495	'MS'
IL2VR	VD02	0.0452251	0.0624735	0.0329118	0.0248278	0.0268793	0.96	0.93	'MS'
SIADR	VD02	0.0385977	0.0624735	0.0329118	0.0248278	0.0268793	0.9405	0.93	'MI'
SIAVL	VD02	0.0385977	0.0624735	0.0329118	0.0248278	0.0268793	0.9265	0.93	'MI'
SMBDR	VD02	0.0385977	0.0624735	0.0329118	0.0248278	0.0268793	0.9155	0.93	'MM'
SMBVR	VD02	0.0323355	0.0624735	0.0329118	0.0248278	0.0268793	0.9135	0.93	'MM'
URAVR	VD02	0.0385977	0.0624735	0.0329118	0.0248278	0.0268793	0.9405	0.93	'MS'
URXL	VD02	0.0323355	0.0624735	0.0329118	0.0248278	0.0268793	0.9135	0.9495	'MS'
AIZL	VD02	0.0444107	0.0624735	0.0329118	0.0248278	0.0268793	0.9375	0.9495	'MI'
AWBR	VD02	0.0317838	0.0597343	0.0329118	0.0248278	0.0268793	0.85	0.9495	'MS'
IL2DL	VD02	0.0323355	0.0536821	0.0263669	0.0248278	0.0268793	0.9135	0.9495	'MS'
URYVL	VD02	0.0385977	0.0536821	0.0263669	0.0248278	0.0268793	0.9405	0.93	'MS'
RMDVR	VD07	0.0241237	0.0138915	0.00816256	0.0204004	0.0268793	0.8	0.9425	'MM'
RMDVR	VD10	0.0570339	0.0217862	0.0323498	0.0248278	0.0268793	0.95	0.9665	'MM'
RMDVR	VD13	0.0521719	0.0145538	0.0268	0.0204004	0.0268793	0.963	0.9425	'MM'
RIAR	ADAL	0.013209	0.0153576	0.0154354	0.0253363	0.026873	0.6	0.924	'II'
AVBR	ADAR	0.0132013	0.0310949	0.00816256	0.0253363	0.026873	0.6	0.95	'II'
AVBR	AINR	0.0195566	0.0283102	0.00816256	0.0253363	0.026873	0.85	0.931	'II'
AVBR	AIYL	0.0132013	0.0283102	0.00816256	0.0253363	0.026873	0.6	0.95	'II'
AVBR	AIZL	0.0195566	0.0310949	0.0154383	0.0253363	0.026873	0.8	0.95	'II'
VD01	ALMR	0.0464034	0.0545424	0.0139944	0.0253363	0.026873	0.931	0.95	'MS'
AVBR	ALMR	0.0180765	0.0289681	0.00607563	0.0253363	0.026873	0.8	0.95	'SI'
VC03	ALNL	0.0224716	0.023508	0.0215894	0.0253363	0.026873	0.8	0.95	'MS'
DVC	ALNL	0.0117338	0.0248273	0.0147317	0.0253363	0.026873	0.45	0.95	'SI'
AVBR	ALNL	0.0201228	0.0310949	0.00816256	0.0253363	0.026873	0.8	0.95	'SI'
PVPR	ALNL	0.0208007	0.00746157	0.00776017	0.0253363	0.026873	0.8	0.95	'SI'
RIAR	AQR	0.0139868	0.0153576	0.0154354	0.0253363	0.026873	0.7	0.924	'SI'
RIAR	AS01	0.0132096	0.0145306	0.0150404	0.0297095	0.026873	0.6	0.9445	'MI'
RIAR	AS02	0.0132096	0.0145306	0.0150404	0.0253363	0.026873	0.6	0.924	'MI'
RIBL	AS02	0.0236592	0.0248359	0.00776017	0.0253363	0.026873	0.85	0.95	'MI'
RIAR	AS03	0.0132096	0.0145306	0.0143165	0.0253363	0.026873	0.6	0.924	'MI'
RIAR	AS04	0.0134413	0.014703	0.0205529	0.0253363	0.026873	0.65	0.924	'MI'
RIAR	AS05	0.0134413	0.014703	0.0143165	0.0253363	0.026873	0.65	0.924	'MI'
RIAR	AS06	0.0134413	0.014703	0.0150404	0.0253363	0.026873	0.65	0.924	'MI'
RIAR	AS07	0.013209	0.00812384	0.0154354	0.0253363	0.026873	0.6	0.924	'MI'
RIBL	AS07	0.0305391	0.0256481	0.00816256	0.0253363	0.026873	0.932	0.95	'MI'
RIAR	AS08	0.0139868	0.00812384	0.0209406	0.0253363	0.026873	0.7	0.924	'MI'
RIBL	AS08	0.0305391	0.0256481	0.00816256	0.0253363	0.026873	0.932	0.95	'MI'
RIAR	AS09	0.0193827	0.0153576	0.0154354	0.0253363	0.026873	0.85	0.924	'MI'
RIAR	AS10	0.0139868	0.0153576	0.0154354	0.0253363	0.026873	0.7	0.924	'MI'
RIAR	AS11	0.0139868	0.0153576	0.0154354	0.0253363	0.026873	0.7	0.924	'MI'
RIBL	AS11	0.0309877	0.0256481	0.00816256	0.0253115	0.026873	0.9345	0.9495	'MI'
AVBR	ASJR	0.0195566	0.0283102	0.0154383	0.0253363	0.026873	0.8	0.931	'SI'
URBL	AVBR	0.0201228	0.0283102	0.0154383	0.0253363	0.026873	0.8	0.931	'SI'
AWBR	AVBR	0.0195566	0.0283102	0.0154383	0.0253363	0.026873	0.8	0.95	'SI'
CEPDL	AVBR	0.0201228	0.0283102	0.0154383	0.0253363	0.026873	0.8	0.931	'SI'
ADLR	AVBR	0.0195566	0.0310949	0.00816256	0.0253363	0.026873	0.8	0.931	'SI'
ASEL	AVBR	0.0195566	0.0283102	0.00816256	0.0253363	0.026873	0.8	0.931	'SI'
AWAL	AVBR	0.0132013	0.0283102	0.00816256	0.0253363	0.026873	0.6	0.931	'SI'
AWCL	AVBR	0.0195566	0.0283102	0.00816256	0.0253363	0.026873	0.8	0.95	'SI'
IL1L	AVBR	0.0201228	0.0283102	0.00816256	0.0253363	0.026873	0.85	0.95	'SI'
IL2DL	AVBR	0.0201228	0.0283102	0.00816256	0.0253363	0.026873	0.85	0.95	'SI'
IL2DR	AVBR	0.0201228	0.0283102	0.00816256	0.0253363	0.026873	0.85	0.931	'SI'
IL2L	AVBR	0.0201228	0.0283102	0.00816256	0.0253363	0.026873	0.85	0.931	'SI'
IL2R	AVBR	0.0201228	0.0283102	0.00816256	0.0253363	0.026873	0.85	0.95	'SI'
IL2VR	AVBR	0.0201228	0.0310949	0.00816256	0.0253363	0.026873	0.85	0.931	'SI'
OLQVL	AVBR	0.0201228	0.0283102	0.00816256	0.0253363	0.026873	0.85	0.931	'SI'
SAADL	AVBR	0.013753	0.0283102	0.00816256	0.0253363	0.026873	0.65	0.931	'II'
SAADR	AVBR	0.036981	0.0310949	0.00816256	0.0253363	0.026873	0.937	0.95	'II'
SAAVR	AVBR	0.0374438	0.0283102	0.00816256	0.0253363	0.026873	0.949	0.931	'II'
URAVR	AVBR	0.0201228	0.0310949	0.00816256	0.0253363	0.026873	0.85	0.931	'SI'
URXL	AVBR	0.0201228	0.0283102	0.00816256	0.0253363	0.026873	0.85	0.95	'SI'
URYVL	AVBR	0.0201228	0.0310949	0.00816256	0.0253363	0.026873	0.85	0.931	'SI'
OLQDR	AVBR	0.0201228	0.0283102	0.00816256	0.0253363	0.026873	0.85	0.931	'SI'
RIBL	AVDL	0.0243791	0.0256481	0.0154354	0.0239187	0.026873	0.85	0.9155	'II'
RIAR	AVG	0.0139868	0.0153576	0.0154354	0.0253363	0.026873	0.7	0.909	'SI'
AVBR	AVKL	0.0206632	0.0383349	0.00816256	0.0253363	0.026873	0.85	0.931	'II'
AVBR	AVKR	0.013753	0.0283102	0.0154354	0.0253363	0.026873	0.65	0.931	'II'
RIBL	AVL	0.0284692	0.0351919	0.00816256	0.0253363	0.026873	0.9	0.932	'MI'
RIAR	AVM	0.0139868	0.0153576	0.0154354	0.0253363	0.026873	0.7	0.924	'SI'
RIAR	BDUR	0.0139868	0.0153576	0.0209406	0.0253363	0.026873	0.7	0.924	'II'
RIAR	DA01	0.028526	0.0314971	0.00816256	0.0253363	0.026873	0.85	0.924	'MI'
RIAR	DA03	0.0134413	0.014703	0.0205529	0.0253363	0.026873	0.65	0.924	'MI'
RIBL	DA03	0.0300206	0.0250083	0.00776017	0.0253115	0.026873	0.913	0.9495	'MI'
RIAR	DA04	0.0134413	0.014703	0.0143165	0.0253363	0.026873	0.65	0.924	'MI'
RIBL	DA04	0.0238605	0.0250083	0.00776017	0.0253115	0.026873	0.85	0.9495	'MI'
RIAR	DA05	0.0134413	0.014703	0.0143165	0.0253363	0.026873	0.65	0.924	'MI'
RIBL	DA05	0.035849	0.0250083	0.00776017	0.0253115	0.026873	0.94	0.9495	'MI'
RIAR	DA06	0.0139868	0.0153576	0.0209406	0.0253363	0.026873	0.7	0.924	'MI'
RIBL	DA06	0.0243791	0.0256481	0.00816256	0.0253115	0.026873	0.85	0.9495	'MI'
RIAR	DA07	0.013209	0.0153576	0.0154354	0.0253363	0.026873	0.6	0.924	'MI'
RIBL	DA07	0.0309877	0.0256481	0.00816256	0.0253363	0.026873	0.917	0.95	'MI'
RIAR	DA08	0.0139868	0.00812384	0.0154354	0.0253363	0.026873	0.7	0.924	'MI'
RIAR	DA09	0.0139868	0.0153576	0.0154354	0.0253363	0.026873	0.7	0.924	'MI'
RIAR	DB01	0.0132096	0.0145306	0.0205529	0.0253363	0.026873	0.6	0.924	'MI'
RIBL	DB01	0.0236592	0.0248359	0.00776017	0.0253363	0.026873	0.85	0.95	'MI'
RIAR	DB02	0.0132096	0.0145306	0.0150404	0.0253363	0.026873	0.6	0.924	'MI'
RIAR	DB03	0.0134413	0.014703	0.0205529	0.0253363	0.026873	0.65	0.924	'MI'
RIAR	DB04	0.0134413	0.014703	0.0143165	0.0253363	0.026873	0.65	0.924	'MI'
RIAR	DB05	0.0139868	0.0153576	0.0209406	0.0253363	0.026873	0.7	0.924	'MI'
RIBL	DB05	0.0243791	0.0256481	0.00816256	0.0253115	0.026873	0.85	0.9495	'MI'
RIAR	DB06	0.0139868	0.0153576	0.0154354	0.0253363	0.026873	0.7	0.924	'MI'
RIAR	DB07	0.00780798	0.0153576	0.0154354	0.0253363	0.026873	0.3	0.924	'MI'
RIBL	DD05	0.0499309	0.0256481	0.0282014	0.0253363	0.026873	0.9515	0.95	'MI'
VC03	DD06	0.0336537	0.0303802	0.0267665	0.0253363	0.026873	0.914	0.918	'MM'
PVPR	DD06	0.0205534	0.00712585	0.00744529	0.0253363	0.026873	0.8	0.918	'MI'
AVBR	DD06	0.0180765	0.0379972	0.00607563	0.0253363	0.026873	0.8	0.918	'MI'
RIAR	DVA	0.0288364	0.0383767	0.0281927	0.0253363	0.026873	0.9	0.924	'II'
RIBL	DVA	0.0497941	0.0476165	0.0226994	0.0253363	0.026873	0.9535	0.95	'II'
RIAR	DVB	0.0139868	0.0153576	0.0219972	0.0253363	0.026873	0.7	0.924	'MI'
OLQDR	DVC	0.0234769	0.0248273	0.0274949	0.0253363	0.026873	0.9265	0.931	'SI'
CEPDL	DVC	0.0238256	0.0248273	0.0220001	0.0253363	0.026873	0.9	0.931	'SI'
RIGR	DVC	0.0238256	0.0248273	0.0219972	0.0253363	0.026873	0.85	0.932	'II'
AINR	DVC	0.02328	0.0176009	0.0147317	0.0253363	0.026873	0.9245	0.931	'II'
HSNL	DVC	0.0349958	0.0172502	0.0147317	0.0253363	0.026873	0.983	0.931	'MI'
IL1L	DVC	0.0355414	0.0248273	0.0147317	0.0253363	0.026873	0.9845	0.95	'SI'
IL2DL	DVC	0.0238256	0.0248273	0.0147317	0.0253363	0.026873	0.93	0.95	'SI'
IL2DR	DVC	0.0234769	0.0248273	0.0147317	0.0253363	0.026873	0.9265	0.931	'SI'
IL2L	DVC	0.0291752	0.0248273	0.0147317	0.0253363	0.026873	0.9455	0.931	'SI'
IL2R	DVC	0.0234769	0.0248273	0.0147317	0.0253363	0.026873	0.9265	0.95	'SI'
IL2VR	DVC	0.0238256	0.0248273	0.0147317	0.0253363	0.026873	0.93	0.931	'SI'
OLQVL	DVC	0.0234769	0.0248273	0.0147317	0.0253363	0.026873	0.9265	0.931	'SI'
RMFR	DVC	0.0355414	0.0176009	0.0147317	0.0253363	0.026873	0.969	0.931	'MI'
URAVR	DVC	0.0238256	0.0248273	0.0147317	0.0253363	0.026873	0.93	0.931	'SI'
URXL	DVC	0.0234769	0.0248273	0.0147317	0.0253363	0.026873	0.9265	0.95	'SI'
URYVL	DVC	0.0238256	0.0248273	0.0147317	0.0253363	0.026873	0.93	0.931	'SI'
SMBVL	DVC	0.0353277	0.0248273	0.0147317	0.0253363	0.026873	0.984	0.95	'MI'
RIBL	FLPR	0.0243791	0.0256481	0.00816256	0.0253115	0.026873	0.85	0.9495	'SI'
VC03	HSNL	0.0327974	0.0231572	0.0215894	0.0253363	0.026873	0.941	0.931	'MM'
AVBR	HSNL	0.0195566	0.0289681	0.00816256	0.0253363	0.026873	0.85	0.931	'MI'
RIAR	HSNR	0.0136885	0.0153576	0.0154354	0.0253363	0.026873	0.65	0.909	'MI'
RIAR	LUAL	0.0139868	0.00812384	0.0209406	0.0253363	0.026873	0.7	0.924	'II'
RIAR	LUAR	0.0139868	0.0153576	0.0209406	0.0253363	0.026873	0.7	0.924	'II'
RIAR	PDA	0.0139868	0.0153576	0.0154354	0.0253363	0.026873	0.7	0.924	'MI'
RIBL	PDA	0.0243791	0.0256481	0.0147255	0.0253363	0.026873	0.85	0.95	'MI'
RIAR	PDB	0.0139868	0.0153576	0.0154354	0.0253363	0.026873	0.7	0.924	'MI'
RIBL	PDB	0.0243791	0.0256481	0.00816256	0.0253115	0.026873	0.85	0.9495	'MI'
RIAR	PDEL	0.0193827	0.0153576	0.0209406	0.0253363	0.026873	0.85	0.924	'SI'
RIBL	PDEL	0.0297478	0.0256481	0.0154354	0.0253363	0.026873	0.9125	0.95	'SI'
SMDVR	PDER	0.012649	0.0290225	0.00816256	0.0253363	0.026873	0.55	0.95	'MS'
RIAR	PHAL	0.0139868	0.0153576	0.0154354	0.0253363	0.026873	0.7	0.924	'SI'
RIBL	PHAL	0.0243791	0.0256481	0.00816256	0.0253115	0.026873	0.85	0.9495	'SI'
RIAR	PHAR	0.0139868	0.0153576	0.0154354	0.0253363	0.026873	0.7	0.924	'SI'
RIBL	PHAR	0.0243791	0.0256481	0.00816256	0.0253363	0.026873	0.85	0.95	'SI'
RIAR	PHBL	0.00780798	0.0153576	0.0154354	0.0253363	0.026873	0.3	0.924	'SI'
RIAR	PHBR	0.0139868	0.0153576	0.0154354	0.0253363	0.026873	0.7	0.924	'SI'
RIAR	PHCL	0.0139868	0.0153576	0.0209406	0.0253363	0.026873	0.7	0.924	'SI'
RIBL	PHCL	0.0364456	0.0256481	0.0154354	0.0253115	0.026873	0.9295	0.9495	'SI'
RIBL	PHCR	0.0309877	0.0256481	0.0209406	0.0253115	0.026873	0.9175	0.9495	'SI'
RIAR	PHCR	0.0139868	0.0153576	0.0209406	0.0253363	0.026873	0.7	0.924	'SI'
RIAR	PLML	0.0139868	0.0153576	0.0154354	0.0253363	0.026873	0.7	0.924	'SI'
RIBL	PLML	0.0243791	0.0328456	0.00816256	0.0253363	0.026873	0.85	0.95	'SI'
RIAR	PLMR	0.0139868	0.0153576	0.0209406	0.0253363	0.026873	0.7	0.924	'SI'
RIBL	PLMR	0.0309877	0.0256481	0.0154354	0.0253115	0.026873	0.9155	0.9495	'SI'
VC03	PLNR	0.0224716	0.023508	0.0215894	0.0253363	0.026873	0.8	0.95	'MS'
DVC	PLNR	0.0234769	0.0176009	0.0147317	0.0253363	0.026873	0.85	0.95	'SI'
VD01	PLNR	0.0463995	0.0549305	0.0143165	0.0253363	0.026873	0.931	0.95	'MS'
AVBR	PLNR	0.0201228	0.0310949	0.00816256	0.0253363	0.026873	0.8	0.95	'SI'
PVPR	PLNR	0.0208007	0.00746157	0.00776017	0.0253363	0.026873	0.8	0.95	'SI'
RIAR	PQR	0.0139868	0.0153576	0.0154354	0.0253363	0.026873	0.7	0.924	'SI'
RIAR	PVCL	0.0209093	0.0208234	0.0154354	0.0253363	0.026873	0.85	0.924	'II'
RIAR	PVCR	0.0139868	0.0268989	0.0209406	0.0253363	0.026873	0.7	0.924	'II'
RIAR	PVDL	0.0139868	0.0153576	0.0154354	0.0253363	0.026873	0.7	0.924	'II'
RIAR	PVDR	0.0139868	0.0153576	0.0209406	0.0253363	0.026873	0.7	0.924	'II'
RIAR	PVM	0.0139868	0.0153576	0.0154354	0.0253363	0.026873	0.7	0.924	'SI'
RIBL	PVM	0.0243791	0.0256481	0.00816256	0.0253363	0.026873	0.85	0.95	'SI'
RIBL	PVNL	0.0309877	0.0430344	0.0154354	0.0253363	0.026873	0.9345	0.9225	'II'
RIAR	PVNL	0.0257457	0.0256197	0.0154354	0.0253363	0.026873	0.9575	0.9	'II'
RIAR	PVNR	0.0139868	0.0256197	0.0209406	0.0253363	0.026873	0.7	0.924	'II'
ADLR	PVPR	0.0187998	0.00746157	0.00776017	0.0253363	0.026873	0.8	0.931	'SI'
AINR	PVPR	0.0187998	0.00746157	0.00776017	0.0253363	0.026873	0.8	0.931	'II'
AIYL	PVPR	0.0120976	0.00746157	0.00776017	0.0253363	0.026873	0.5	0.95	'II'
ASEL	PVPR	0.0133382	0.00746157	0.00776017	0.0253363	0.026873	0.6	0.931	'SI'
AVKL	PVPR	0.014191	0.00746157	0.00776017	0.0253363	0.026873	0.7	0.931	'II'
AVKR	PVPR	0.0193454	0.00746157	0.00776017	0.0253363	0.026873	0.8	0.931	'II'
AWAL	PVPR	0.00671079	0.00746157	0.00776017	0.0253363	0.026873	0.25	0.931	'SI'
AWCL	PVPR	0.0187998	0.00746157	0.00776017	0.0253363	0.026873	0.8	0.95	'SI'
IL1L	PVPR	0.0193454	0.00746157	0.00776017	0.0253363	0.026873	0.85	0.95	'SI'
IL2DL	PVPR	0.0193454	0.00746157	0.00776017	0.0253363	0.026873	0.85	0.95	'SI'
IL2DR	PVPR	0.0193454	0.00746157	0.00776017	0.0253363	0.026873	0.85	0.931	'SI'
IL2L	PVPR	0.0126424	0.00746157	0.00776017	0.0253363	0.026873	0.55	0.931	'SI'
IL2R	PVPR	0.0193454	0.00746157	0.00776017	0.0253363	0.026873	0.85	0.95	'SI'
IL2VR	PVPR	0.0193454	0.00746157	0.00776017	0.0253363	0.026873	0.85	0.931	'SI'
OLQVL	PVPR	0.0146786	0.00746157	0.00776017	0.0253363	0.026873	0.75	0.931	'SI'
RIGR	PVPR	0.0277231	0.014703	0.00776017	0.0253363	0.026873	0.85	0.932	'II'
RMFR	PVPR	0.0146786	0.00746157	0.00776017	0.0253363	0.026873	0.7	0.931	'MI'
SAADR	PVPR	0.0208007	0.00746157	0.00776017	0.0253363	0.026873	0.8	0.95	'II'
SIADR	PVPR	0.0193454	0.00746157	0.00776017	0.0253363	0.026873	0.85	0.931	'II'
SIAVL	PVPR	0.0146786	0.00746157	0.00776017	0.0253363	0.026873	0.7	0.931	'II'
SMBDR	PVPR	0.0193454	0.00746157	0.00776017	0.0253363	0.026873	0.8	0.931	'MI'
SMBVR	PVPR	0.0193454	0.00746157	0.00776017	0.0253363	0.026873	0.85	0.931	'MI'
URAVR	PVPR	0.0208007	0.00746157	0.00776017	0.0253363	0.026873	0.85	0.931	'SI'
URBL	PVPR	0.0193454	0.00746157	0.00776017	0.0253363	0.026873	0.8	0.931	'SI'
URXL	PVPR	0.0146786	0.00746157	0.00776017	0.0253363	0.026873	0.75	0.95	'SI'
URYVL	PVPR	0.0193454	0.00746157	0.00776017	0.0253363	0.026873	0.85	0.931	'SI'
AIZL	PVPR	0.0181743	0.00746157	0.00776017	0.0253363	0.026873	0.8	0.95	'II'
ASJR	PVPR	0.0202551	0.00746157	0.00776017	0.0253363	0.026873	0.8	0.931	'SI'
OLQDR	PVPR	0.00726252	0.00746157	0.00776017	0.0253363	0.026873	0.3	0.931	'SI'
SMBVL	PVPR	0.0208007	0.00746157	0.00776017	0.0253363	0.026873	0.85	0.95	'MI'
AWBR	PVPR	0.00671079	0.00746157	0.00776017	0.0253363	0.026873	0.25	0.95	'SI'
ALMR	PVPR	0.0205534	0.00712585	0.00744529	0.0253363	0.026873	0.8	0.95	'SI'
RIAR	PVWL	0.0139868	0.0153576	0.0209406	0.0253363	0.026873	0.7	0.924	'II'
RIBL	PVWL	0.0243791	0.0256481	0.00816256	0.0253363	0.026873	0.85	0.95	'II'
RIAR	PVWR	0.0139868	0.0153576	0.0154354	0.0253363	0.026873	0.7	0.924	'II'
RIBL	PVWR	0.0243791	0.0256481	0.00816256	0.0253363	0.026873	0.85	0.95	'II'
ALA	RIAR	0.0139868	0.0153576	0.0154354	0.0253363	0.026873	0.7	0.924	'II'
RID	RIAR	0.0209093	0.0153576	0.0154354	0.0253363	0.026873	0.85	0.924	'MI'
ALA	RIBL	0.0243791	0.0256481	0.00816256	0.0253363	0.026873	0.85	0.95	'II'
RIAR	RIFR	0.0136885	0.0153576	0.0154354	0.0253363	0.026873	0.65	0.924	'II'
AVBR	RIGR	0.0206632	0.0355622	0.0154383	0.0253363	0.026873	0.8	0.932	'II'
AVBR	RMFR	0.0201228	0.0283102	0.00816256	0.0253363	0.026873	0.8	0.931	'MI'
RIAR	SABD	0.0132096	0.0145306	0.0150404	0.0253363	0.026873	0.6	0.924	'II'
RIAR	SABVL	0.0132096	0.0145306	0.0154354	0.0297095	0.026873	0.6	0.9445	'II'
RIAR	SABVR	0.0132096	0.0145306	0.0154354	0.0253363	0.026873	0.6	0.924	'II'
AVBR	SDQR	0.0201228	0.0283102	0.00816256	0.0253363	0.026873	0.8	0.931	'II'
AVBR	SIADR	0.0201228	0.0283102	0.00816256	0.0253363	0.026873	0.85	0.931	'II'
AVBR	SIAVL	0.0201228	0.0310949	0.00816256	0.0253363	0.026873	0.8	0.931	'II'
AVBR	SMBDR	0.013753	0.0283102	0.00816256	0.0253363	0.026873	0.65	0.931	'MI'
AVBR	SMBVL	0.0316652	0.0310949	0.0154383	0.0253363	0.026873	0.9635	0.95	'MI'
AVBR	SMBVR	0.0201228	0.0310949	0.00816256	0.0253363	0.026873	0.85	0.931	'MI'
RIAR	VA04	0.0134413	0.014703	0.0150404	0.0253363	0.026873	0.65	0.924	'MI'
RIAR	VA05	0.0126424	0.014703	0.0205529	0.0253363	0.026873	0.55	0.924	'MI'
RIBL	VA06	0.0238605	0.0250083	0.0205529	0.0248278	0.026873	0.85	0.9475	'MI'
RIAR	VA06	0.0134413	0.014703	0.0150404	0.0253363	0.026873	0.65	0.924	'MI'
RIAR	VA07	0.0134413	0.014703	0.0150404	0.0253363	0.026873	0.65	0.924	'MI'
RIBL	VA07	0.0238605	0.0250083	0.00776017	0.0253115	0.026873	0.85	0.9495	'MI'
RIBL	VA08	0.0292404	0.0250083	0.00776017	0.0217195	0.026873	0.85	0.9095	'MI'
SMDVR	VA09	0.0198374	0.00812384	0.0147317	0.0253363	0.026873	0.8	0.95	'MM'
RIAR	VA10	0.0139868	0.0153576	0.0209406	0.0253363	0.026873	0.7	0.924	'MI'
RIBL	VA10	0.0243791	0.0256481	0.0154354	0.0253363	0.026873	0.85	0.95	'MI'
RIAR	VA11	0.0139868	0.0153576	0.0209406	0.0253363	0.026873	0.7	0.924	'MI'
RIAR	VA12	0.0139868	0.00812384	0.0154354	0.0253363	0.026873	0.7	0.924	'MI'
RIBL	VB01	0.0310186	0.0248359	0.0205529	0.0253363	0.026873	0.905	0.95	'MI'
RIAR	VB01	0.0132096	0.0145306	0.0150404	0.0253363	0.026873	0.6	0.924	'MI'
RIAR	VB03	0.0134413	0.014703	0.0150404	0.0253363	0.026873	0.65	0.924	'MI'
RIAR	VB04	0.0134413	0.014703	0.0150404	0.0253363	0.026873	0.65	0.924	'MI'
RIAR	VB05	0.0134413	0.014703	0.0205529	0.0253363	0.026873	0.65	0.924	'MI'
RIAR	VB06	0.0134413	0.014703	0.0205529	0.0253363	0.026873	0.65	0.924	'MI'
RIAR	VB07	0.0139868	0.0153576	0.0150404	0.0253363	0.026873	0.7	0.924	'MI'
RIAR	VB08	0.012649	0.00812384	0.0154354	0.0297095	0.026873	0.55	0.9445	'MI'
RIBL	VB08	0.0292282	0.0256481	0.00816256	0.0248278	0.026873	0.85	0.9475	'MI'
RIAR	VB09	0.012649	0.0290225	0.0154354	0.0253363	0.026873	0.55	0.9085	'MI'
RIBL	VB10	0.0243791	0.0256481	0.0209406	0.0253363	0.026873	0.85	0.95	'MI'
RIAR	VB10	0.0139868	0.0153576	0.0154354	0.0253363	0.026873	0.7	0.924	'MI'
RIBL	VB11	0.0309877	0.0256481	0.0209406	0.0253363	0.026873	0.9345	0.95	'MI'
RIAR	VB11	0.0139868	0.0153576	0.0154354	0.0253363	0.026873	0.7	0.924	'MI'
RIAR	VC01	0.0132096	0.0145306	0.0205529	0.0253363	0.026873	0.6	0.924	'MI'
RIAR	VC02	0.0134413	0.014703	0.0150404	0.0253363	0.026873	0.65	0.924	'MI'
RMGL	VC03	0.0224716	0.023508	0.028868	0.0253363	0.026873	0.85	0.932	'MM'
CEPDL	VC03	0.0224716	0.023508	0.028868	0.0253363	0.026873	0.85	0.931	'MS'
ADAR	VC03	0.0284806	0.023508	0.0215894	0.0253363	0.026873	0.9	0.95	'MI'
ADLR	VC03	0.0218912	0.023508	0.0215894	0.0253363	0.026873	0.8	0.931	'MS'
AINR	VC03	0.0284806	0.023508	0.0215894	0.0253363	0.026873	0.917	0.931	'MI'
AIYL	VC03	0.0327974	0.023508	0.0215894	0.0253363	0.026873	0.9245	0.95	'MI'
ASEL	VC03	0.0218912	0.023508	0.0215894	0.0253363	0.026873	0.8	0.931	'MS'
AVKL	VC03	0.0360575	0.023508	0.0215894	0.0253363	0.026873	0.9375	0.931	'MI'
AVKR	VC03	0.0286214	0.023508	0.0215894	0.0253363	0.026873	0.85	0.931	'MI'
AWAL	VC03	0.0218912	0.023508	0.0215894	0.0253363	0.026873	0.8	0.931	'MS'
AWCL	VC03	0.0280472	0.023508	0.0215894	0.0253363	0.026873	0.85	0.95	'MS'
IL1L	VC03	0.0224716	0.023508	0.0215894	0.0253363	0.026873	0.85	0.95	'MS'
IL2DL	VC03	0.0224716	0.023508	0.0215894	0.0253363	0.026873	0.85	0.95	'MS'
IL2DR	VC03	0.033895	0.023508	0.0215894	0.0253363	0.026873	0.946	0.931	'MS'
IL2L	VC03	0.0224716	0.023508	0.0215894	0.0253363	0.026873	0.85	0.931	'MS'
IL2R	VC03	0.0224716	0.023508	0.0215894	0.0253363	0.026873	0.85	0.95	'MS'
IL2VR	VC03	0.0224716	0.023508	0.0215894	0.0253363	0.026873	0.85	0.931	'MS'
OLQVL	VC03	0.0224716	0.023508	0.0215894	0.0253363	0.026873	0.85	0.931	'MS'
RIGR	VC03	0.0355438	0.023508	0.0215894	0.0253363	0.026873	0.9215	0.932	'MI'
RMFR	VC03	0.0224716	0.023508	0.0215894	0.0253363	0.026873	0.85	0.931	'MM'
SAADL	VC03	0.0224716	0.023508	0.0215894	0.0253363	0.026873	0.85	0.931	'MI'
SAADR	VC03	0.0415117	0.023508	0.0215894	0.0253363	0.026873	0.9345	0.95	'MI'
SAAVR	VC03	0.0453848	0.023508	0.0215894	0.0253363	0.026873	0.954	0.931	'MI'
SDQR	VC03	0.0224716	0.023508	0.0215894	0.0253363	0.026873	0.85	0.931	'MI'
SIADR	VC03	0.0224716	0.023508	0.0215894	0.0253363	0.026873	0.85	0.931	'MI'
SIAVL	VC03	0.0224716	0.023508	0.0215894	0.0253363	0.026873	0.8	0.931	'MI'
SMBDR	VC03	0.0224716	0.023508	0.0215894	0.0253363	0.026873	0.8	0.931	'MM'
SMBVR	VC03	0.0224716	0.023508	0.0215894	0.0253363	0.026873	0.85	0.931	'MM'
URAVR	VC03	0.0286214	0.023508	0.0215894	0.0253363	0.026873	0.918	0.931	'MS'
URXL	VC03	0.0224716	0.023508	0.0215894	0.0253363	0.026873	0.85	0.95	'MS'
URYVL	VC03	0.0224716	0.023508	0.0215894	0.0253363	0.026873	0.85	0.931	'MS'
AIZL	VC03	0.0282937	0.023508	0.0215894	0.0253363	0.026873	0.85	0.95	'MI'
ASJR	VC03	0.0218912	0.023508	0.0215894	0.0253363	0.026873	0.8	0.931	'MS'
OLQDR	VC03	0.0224716	0.023508	0.0215894	0.0253363	0.026873	0.85	0.931	'MS'
SMBVL	VC03	0.0224716	0.023508	0.0215894	0.0253363	0.026873	0.85	0.95	'MM'
AWBR	VC03	0.0218912	0.023508	0.0215894	0.0253363	0.026873	0.8	0.95	'MS'
ALMR	VC03	0.0222181	0.0231572	0.0212644	0.0253363	0.026873	0.8	0.95	'MS'
URBL	VC03	0.0224716	0.023508	0.0143165	0.0253363	0.026873	0.85	0.931	'MS'
RIBL	VC04	0.0238605	0.0312596	0.00776017	0.0253363	0.026873	0.85	0.932	'MI'
RIBL	VC05	0.0238605	0.0250083	0.00816256	0.0253363	0.026873	0.85	0.932	'MI'
AWBR	VD01	0.0515024	0.0549305	0.0216066	0.0253363	0.026873	0.945	0.95	'MS'
RMGL	VD01	0.0457282	0.0549305	0.0215894	0.0253363	0.026873	0.94	0.932	'MM'
ADAR	VD01	0.0395098	0.0549305	0.0143165	0.0253363	0.026873	0.9095	0.95	'MI'
ADLR	VD01	0.0458395	0.0549305	0.0143165	0.0253363	0.026873	0.9305	0.931	'MS'
AINR	VD01	0.0458395	0.0549305	0.0143165	0.0253363	0.026873	0.9405	0.931	'MI'
AIYL	VD01	0.0458395	0.0549305	0.0143165	0.0253363	0.026873	0.9305	0.95	'MI'
ASEL	VD01	0.0421944	0.0549305	0.0143165	0.0253363	0.026873	0.919	0.931	'MS'
AVKL	VD01	0.0572217	0.0549305	0.0143165	0.0253363	0.026873	0.9555	0.931	'MI'
AVKR	VD01	0.0466889	0.0549305	0.0143165	0.0253363	0.026873	0.9225	0.931	'MI'
AWAL	VD01	0.0395098	0.0549305	0.0143165	0.0253363	0.026873	0.909	0.931	'MS'
AWCL	VD01	0.0509854	0.0549305	0.0143165	0.0253363	0.026873	0.944	0.95	'MS'
IL2DL	VD01	0.0463995	0.0549305	0.0143165	0.0253363	0.026873	0.942	0.95	'MS'
IL2VR	VD01	0.0520624	0.0549305	0.0143165	0.0253363	0.026873	0.955	0.931	'MS'
OLQVL	VD01	0.0463995	0.0549305	0.0143165	0.0253363	0.026873	0.942	0.931	'MS'
RIGR	VD01	0.0520624	0.0549305	0.0143165	0.0253363	0.026873	0.9365	0.932	'MI'
RMFR	VD01	0.0463995	0.0549305	0.0143165	0.0253363	0.026873	0.932	0.931	'MM'
SAADL	VD01	0.0457282	0.0549305	0.0143165	0.0253363	0.026873	0.94	0.931	'MI'
SAADR	VD01	0.0572217	0.0549305	0.0143165	0.0253363	0.026873	0.9415	0.95	'MI'
SAAVR	VD01	0.0457282	0.0549305	0.0143165	0.0253363	0.026873	0.919	0.931	'MI'
SIADR	VD01	0.0520624	0.0549305	0.0143165	0.0253363	0.026873	0.955	0.931	'MI'
SIAVL	VD01	0.0486595	0.0549305	0.0143165	0.0253363	0.026873	0.937	0.931	'MI'
SMBVR	VD01	0.0442765	0.0549305	0.0143165	0.0253363	0.026873	0.936	0.931	'MM'
URBL	VD01	0.0486595	0.0549305	0.0143165	0.0253363	0.026873	0.938	0.931	'MS'
URYVL	VD01	0.0515489	0.0549305	0.0143165	0.0253363	0.026873	0.954	0.931	'MS'
ASJR	VD01	0.0461345	0.0549305	0.0143165	0.0253363	0.026873	0.931	0.931	'MS'
OLQDR	VD01	0.0515489	0.0549305	0.0143165	0.0253363	0.026873	0.954	0.931	'MS'
RIAR	VD04	0.0241832	0.0466359	0.0191011	0.0253363	0.026873	0.85	0.909	'MI'
RIBL	VD04	0.0473993	0.0570583	0.0143165	0.0253115	0.026873	0.9455	0.932	'MI'
RIAR	VD07	0.0134413	0.014703	0.0209406	0.0311149	0.026873	0.65	0.9495	'MI'
RIAR	VD11	0.0139868	0.0153576	0.0154354	0.0253363	0.026873	0.7	0.924	'MI'
RIBL	VD11	0.0309877	0.0256481	0.00816256	0.0253115	0.026873	0.9345	0.9495	'MI'
RIBL	VD12	0.0243791	0.0256481	0.0209406	0.0211929	0.026873	0.85	0.9255	'MI'
RIAR	VD12	0.0139868	0.0153576	0.0154354	0.0253363	0.026873	0.7	0.924	'MI'
RIAR	VD13	0.0139868	0.0153576	0.0274949	0.0297095	0.026873	0.65	0.9445	'MI'
URADR	AVAR	0.0213568	0.0145538	0.0784408	0.0397556	0.0401501	0.8	0.9395	'SI'
AVAR	AVHL	0.0312973	0.0124502	0.0762933	0.0343611	0.0401501	0.926	0.93	'II'
RIAL	RMDR	0.03459	0.0241317	0.013984	0.0294369	0.0298835	0.85	0.9215	'MI'
RMDL	RMDDR	0.0293243	0.0139273	0.0194921	0.0345494	0.0342419	0.953	0.933	'MM'
RMEV	RMDDR	0.0124631	0.0139273	0.013984	0.0345494	0.0342419	0.55	0.931	'MM'
RMED	RMDDR	0.0246408	0.0139273	0.013984	0.0345494	0.0342419	0.921	0.938	'MM'
SMDVL	AS01	0.0132096	0.00728914	0.00776017	0.0211937	0.026873	0.6	0.9315	'MM'
RMDR	AVDR	0.029665	0.00812384	0.00816256	0.0253363	0.026873	0.9155	0.9535	'MI'
RMDR	DD04	0.0842656	0.0574945	0.0302238	0.0253363	0.026873	0.972	0.9365	'MM'
AIAL	DD04	0.0589616	0.0639108	0.0268829	0.0253363	0.026873	0.9335	0.9365	'MI'
AVAL	ADFR	0.0465702	0.0208108	0.081542	0.0269547	0.0350516	0.939	0.9235	'SI'
RMDR	AVBL	0.0552382	0.0142149	0.0147255	0.0253363	0.026873	0.9695	0.948	'MI'
RIFL	DD04	0.0699434	0.0621534	0.0243285	0.0234762	0.0250044	0.9685	0.9265	'MI'
AVJL	FLPL	0.00578054	0.0180014	0.00607563	0.0234762	0.0250044	0.2	0.94	'SI'
AVBL	AVDR	0.0180765	0.01856	0.00607563	0.0234762	0.0250044	0.8	0.9385	'II'
AVBL	RIFL	0.0190935	0.0130168	0.00744529	0.0234517	0.0250044	0.8	0.938	'II'
SMDVR	VC03	0.0286214	0.023508	0.0215894	0.0362265	0.0359103	0.9	0.9435	'MM'
AIAR	VD05	0.0758498	0.0510717	0.0298487	0.0204004	0.0227232	0.995	0.9785	'MI'
AVER	ADAR	0.0189956	0.0131157	0.0139867	0.0252875	0.0290103	0.75	0.9435	'II'
AVER	AINR	0.0253422	0.0131157	0.0139867	0.0252875	0.0290103	0.85	0.9255	'II'
AVER	AIYL	0.0184751	0.0131157	0.0139867	0.0252875	0.0290103	0.75	0.9435	'II'
AVER	ALNL	0.0177925	0.0131157	0.0139867	0.0252875	0.0290103	0.75	0.9435	'SI'
AVER	ASEL	0.0129108	0.0131157	0.0139867	0.0252875	0.0290103	0.6	0.9255	'SI'
URBL	AVER	0.0177925	0.0131157	0.0195031	0.0252875	0.0290103	0.75	0.9255	'SI'
CEPDL	AVER	0.0177925	0.0131157	0.0195031	0.0252875	0.0290103	0.75	0.9255	'SI'
IL1L	AVER	0.0177925	0.0131157	0.0139867	0.0252875	0.0290103	0.75	0.9435	'SI'
IL2DL	AVER	0.024123	0.0131157	0.0139867	0.0252875	0.0290103	0.85	0.9435	'SI'
IL2DR	AVER	0.0220064	0.0131157	0.0139867	0.0252875	0.0290103	0.8	0.9255	'SI'
IL2L	AVER	0.0177925	0.0131157	0.0139867	0.0252875	0.0290103	0.75	0.9255	'SI'
IL2R	AVER	0.0177925	0.0131157	0.0139867	0.0252875	0.0290103	0.75	0.9435	'SI'
IL2VR	AVER	0.0177925	0.0131157	0.0139867	0.0252875	0.0290103	0.75	0.9255	'SI'
URAVR	AVER	0.0177925	0.0131157	0.0139867	0.0252875	0.0290103	0.75	0.9255	'SI'
URXL	AVER	0.0177925	0.0131157	0.0139867	0.0252875	0.0290103	0.75	0.9435	'SI'
URYVL	AVER	0.01292	0.0131157	0.0139867	0.0252875	0.0290103	0.6	0.9255	'SI'
OLQDR	AVER	0.00629055	0.0131157	0.0139867	0.0252875	0.0290103	0.25	0.9255	'SI'
AVER	AWAL	0.00750973	0.0131157	0.0139867	0.0252875	0.0290103	0.3	0.9255	'SI'
AVER	HSNL	0.029856	0.0145538	0.0132847	0.0252875	0.0290103	0.9055	0.9255	'MI'
AVER	RIGR	0.0356194	0.0203511	0.0195031	0.0231527	0.0290103	0.907	0.914	'II'
AVER	RMFR	0.0220064	0.0131157	0.0139867	0.0231527	0.0290103	0.8	0.913	'MI'
AVER	SIADR	0.020336	0.0131157	0.0139867	0.0252875	0.0290103	0.8	0.9255	'II'
AVER	SIAVL	0.00629055	0.0131157	0.0139867	0.0252875	0.0290103	0.25	0.9255	'II'
VD02	DA04	0.0376633	0.0611699	0.0303773	0.0229639	0.0266383	0.925	0.939	'MM'
VD02	DB03	0.0314187	0.0611699	0.0303773	0.0229639	0.0266383	0.85	0.939	'MM'
VD02	DB04	0.0342504	0.0611699	0.0303773	0.0229639	0.0266383	0.9095	0.939	'MM'
VD02	VA06	0.0376633	0.0611699	0.0303773	0.0229639	0.0266383	0.925	0.939	'MM'
VD02	VB06	0.0376633	0.0611699	0.0303773	0.0229639	0.0266383	0.925	0.939	'MM'
RID	VD02	0.0441107	0.0620712	0.0325723	0.0229639	0.0266383	0.9465	0.939	'MM'
SABVR	VD02	0.0354996	0.0570705	0.0325723	0.0229639	0.0266383	0.9155	0.939	'MI'
AVJR	FLPL	0.0121503	0.00601571	0.0133455	0.0292539	0.0296834	0.45	0.9465	'SI'
RIAR	AIBL	0.0200624	0.0139273	0.0194921	0.0294369	0.0298835	0.85	0.929	'II'
RIPR	RIAR	0.0124631	0.0139273	0.013984	0.0294369	0.0298835	0.5	0.929	'II'
AVAL	RIR	0.0427381	0.0208108	0.081542	0.0344639	0.0350516	0.9385	0.953	'II'
AVBL	RIBR	0.0201228	0.0208108	0.0147255	0.0311149	0.031553	0.8	0.9445	'II'
AVAR	AIAL	0.0404287	0.0217831	0.0784408	0.037764	0.0388537	0.9295	0.9355	'II'
RIGL	PVPL	0.0392699	0.0143809	0.00816256	0.0311149	0.031553	0.926	0.93	'II'
AVAR	AVM	0.0280038	0.0124502	0.0817546	0.0321319	0.0331826	0.9	0.934	'SI'
AVAR	BDUR	0.0234569	0.0124502	0.0817546	0.0321319	0.0331826	0.85	0.934	'II'
AVAR	VA08	0.0317671	0.0135603	0.0338946	0.0363946	0.0331826	0.915	0.937	'MI'
AVAR	VA09	0.033095	0.0124502	0.0817546	0.0363946	0.0331826	0.919	0.9485	'MI'
VD02	VD03	0.0203385	0.0258548	0.0725927	0.0268425	0.0331826	0.75	0.914	'MM'
RIAR	PVQR	0.0136885	0.0139273	0.013984	0.0252849	0.0298835	0.65	0.908	'II'
RMDVR	ADAL	0.00780798	0.0145538	0.0154354	0.0173042	0.0264795	0.35	0.9155	'MI'
RMDVR	AQR	0.0192893	0.0145538	0.0154354	0.0173042	0.0264795	0.8	0.9155	'MS'
RMDVR	AS02	0.00706115	0.0136914	0.0150404	0.0173042	0.0264795	0.3	0.9155	'MM'
RMDVR	AS03	0.0185425	0.0136914	0.0150404	0.0173042	0.0264795	0.75	0.9155	'MM'
RMDVR	AS11	0.00780798	0.0145538	0.0154354	0.0173042	0.0264795	0.35	0.9155	'MM'
RMDVR	AVG	0.00780798	0.0145538	0.0154354	0.0173042	0.0264795	0.35	0.85	'MS'
RMDVR	AVM	0.00780798	0.0145538	0.0154354	0.0173042	0.0264795	0.35	0.9155	'MS'
RMDVR	BDUR	0.015224	0.0145538	0.0209406	0.0173042	0.0264795	0.75	0.9155	'MI'
RMDVR	DA02	0.0317467	0.0197121	0.0150404	0.0173042	0.0264795	0.85	0.9155	'MM'
RMDVR	DA04	0.0187438	0.0138915	0.0150404	0.0173042	0.0264795	0.8	0.9155	'MM'
RMDVR	DA07	0.00780798	0.0145538	0.0154354	0.0173042	0.0264795	0.35	0.9155	'MM'
RMDVR	DA08	0.00780798	0.0145538	0.0154354	0.0173042	0.0264795	0.35	0.9155	'MM'
RMDVR	DB01	0.00706115	0.0136914	0.0150404	0.0173042	0.0264795	0.3	0.9155	'MM'
RMDVR	FLPR	0.0192893	0.0145538	0.0154354	0.0173042	0.0264795	0.8	0.9155	'MS'
RMDVR	HSNR	0.0189611	0.0145538	0.0154354	0.0173042	0.0264795	0.8	0.85	'MM'
RMDVR	LUAL	0.0192893	0.0145538	0.0154354	0.0173042	0.0264795	0.8	0.9155	'MI'
RMDVR	PDA	0.0192893	0.0145538	0.0154354	0.0173042	0.0264795	0.8	0.9155	'MM'
RMDVR	PDB	0.0192893	0.0145538	0.0154354	0.0173042	0.0264795	0.8	0.9155	'MM'
RMDVR	PHAR	0.0340479	0.0145538	0.0154354	0.0173042	0.0264795	0.9365	0.9155	'MS'
RMDVR	PHCR	0.00780798	0.0145538	0.0154354	0.0173042	0.0264795	0.35	0.9155	'MS'
RMDVR	PLML	0.0192893	0.0145538	0.0154354	0.0173042	0.0264795	0.8	0.9155	'MS'
RMDVR	PLMR	0.00780798	0.0145538	0.0154354	0.0173042	0.0264795	0.35	0.9155	'MS'
RMDVR	PQR	0.00780798	0.0145538	0.0154354	0.0173042	0.0264795	0.35	0.9155	'MS'
RMDVR	PVDR	0.00780798	0.0145538	0.0154354	0.0173042	0.0264795	0.35	0.9155	'MI'
RMDVR	PVM	0.0192893	0.0145538	0.0154354	0.0173042	0.0264795	0.8	0.9155	'MS'
RMDVR	PVNL	0.00780798	0.0272444	0.0154354	0.0173042	0.0264795	0.35	0.85	'MI'
RMDVR	PVWL	0.0192893	0.0145538	0.0154354	0.0173042	0.0264795	0.8	0.9155	'MI'
RMDVR	PVWR	0.00780798	0.0145538	0.0154354	0.0173042	0.0264795	0.35	0.9155	'MI'
RMDVR	SABVR	0.00706115	0.0136914	0.0154354	0.0173042	0.0264795	0.3	0.9155	'MI'
RMDVR	VA10	0.0192893	0.0145538	0.0154354	0.0173042	0.0264795	0.8	0.9155	'MM'
RMDVR	VA11	0.015224	0.0145538	0.00816256	0.0173042	0.0264795	0.75	0.9155	'MM'
RMDVR	VB01	0.0246096	0.0136914	0.0150404	0.0173042	0.0264795	0.85	0.9155	'MM'
RMDVR	VB03	0.0187438	0.0138915	0.0150404	0.0173042	0.0264795	0.8	0.9155	'MM'
RMDVR	VB08	0.0179515	0.0145538	0.0154383	0.0173042	0.0264795	0.75	0.9155	'MM'
RMDVR	VB09	0.0179515	0.0248532	0.0154383	0.0173042	0.0264795	0.75	0.85	'MM'
RMDVR	VD11	0.00780798	0.0145538	0.0154354	0.0173042	0.0264795	0.35	0.9155	'MM'
VD02	VA02	0.0527552	0.0585447	0.0303773	0.0229639	0.0321393	0.941	0.919	'MM'
AVEL	AVKL	0.0265321	0.0139303	0.0139867	0.0252875	0.027619	0.907	0.9225	'II'
RMDDL	PVQL	0.00750973	0.00669032	0.0194921	0.0218079	0.027619	0.3	0.85	'MI'
RMDDL	AIMR	0.0149258	0.00669032	0.00670825	0.0297754	0.0276171	0.8	0.9445	'MI'
RMDDL	AINL	0.00750973	0.00669032	0.00670825	0.0297754	0.0276171	0.3	0.93	'MI'
RMDDL	AIZR	0.0231243	0.00669032	0.00670825	0.0297754	0.0276171	0.85	0.93	'MI'
RMDDL	ALNR	0.00629055	0.00669032	0.00670825	0.0297754	0.0276171	0.25	0.9445	'MS'
RMDDL	ASGL	0.0129108	0.00669032	0.00670825	0.0297754	0.0276171	0.55	0.921	'MS'
RMDDL	ASGR	0.0189611	0.00669032	0.00670825	0.0297754	0.0276171	0.85	0.9445	'MS'
RMDDL	ASIL	0.00750973	0.00669032	0.0132784	0.0297754	0.0276171	0.3	0.93	'MS'
RMDDL	ASIR	0.0189611	0.00669032	0.00670825	0.0297754	0.0276171	0.85	0.93	'MS'
RMDDL	AUAL	0.00629055	0.00669032	0.00670825	0.0297754	0.0276171	0.25	0.93	'MS'
RMDDL	AUAR	0.00629055	0.00669032	0.00670825	0.0297754	0.0276171	0.25	0.93	'MS'
RMDDL	PLNL	0.00629055	0.00669032	0.00670825	0.0297754	0.0276171	0.25	0.93	'MS'
URYDL	RMDDL	0.0129117	0.00669032	0.0194921	0.0297754	0.0276171	0.55	0.93	'MS'
RMED	RMDDL	0.0124631	0.00669032	0.013984	0.0311681	0.0276171	0.5	0.9255	'MM'
OLLL	RMDDL	0.00629055	0.00669032	0.0132784	0.0297754	0.0276171	0.25	0.93	'MS'
ADFL	RMDDL	0.01292	0.00669032	0.00670825	0.0297754	0.0276171	0.55	0.93	'MS'
AFDL	RMDDL	0.0141223	0.00669032	0.00670825	0.0297754	0.0276171	0.7	0.93	'MS'
BAGR	RMDDL	0.00629055	0.00669032	0.00670825	0.0297754	0.0276171	0.25	0.93	'MS'
CEPDR	RMDDL	0.0129117	0.00669032	0.00670825	0.0297754	0.0276171	0.55	0.912	'MS'
CEPVR	RMDDL	0.00629055	0.00669032	0.00670825	0.0297754	0.0276171	0.25	0.924	'MS'
IL1DL	RMDDL	0.00629055	0.00669032	0.00670825	0.0297754	0.0276171	0.25	0.93	'MS'
IL1DR	RMDDL	0.00629055	0.00669032	0.00670825	0.0297754	0.0276171	0.25	0.93	'MS'
IL1R	RMDDL	0.0129117	0.00669032	0.00670825	0.0297754	0.0276171	0.55	0.93	'MS'
IL1VL	RMDDL	0.0129117	0.00669032	0.00670825	0.0297754	0.0276171	0.55	0.93	'MS'
RIH	RMDDL	0.00629055	0.00669032	0.00670825	0.0297754	0.0276171	0.25	0.921	'MI'
RIPL	RMDDL	0.00629055	0.00669032	0.00670825	0.0297754	0.0276171	0.25	0.93	'MI'
RMER	RMDDL	0.0129117	0.00669032	0.00670825	0.0297754	0.0276171	0.55	0.924	'MM'
SIBDL	RMDDL	0.00629055	0.00669032	0.00670825	0.0297754	0.0276171	0.25	0.93	'MI'
URADL	RMDDL	0.00629055	0.00669032	0.00670825	0.0297754	0.0276171	0.25	0.93	'MS'
URAVL	RMDDL	0.00629055	0.00669032	0.00670825	0.0297754	0.0276171	0.25	0.93	'MS'
URBR	RMDDL	0.00629055	0.00669032	0.00670825	0.0297754	0.0276171	0.25	0.93	'MS'
URXR	RMDDL	0.00629055	0.00669032	0.00670825	0.0297754	0.0276171	0.25	0.93	'MS'
URYDR	RMDDL	0.00629055	0.00669032	0.00670825	0.0297754	0.0276171	0.25	0.93	'MS'
URYVR	RMDDL	0.00629055	0.00669032	0.00670825	0.0297754	0.0276171	0.25	0.9445	'MS'
BAGL	RMDDL	0.0129117	0.00669032	0.00670825	0.0297754	0.0276171	0.55	0.93	'MS'
RMDDL	RMHR	0.00629055	0.00669032	0.00670825	0.0297754	0.0276171	0.25	0.93	'MM'
RMDDL	SIADL	0.00629055	0.00669032	0.00670825	0.0297754	0.0276171	0.25	0.912	'MI'
RMDDL	SIAVR	0.00629055	0.00669032	0.00670825	0.0297754	0.0276171	0.25	0.93	'MI'
OLQVL	RIAL	0.0284363	0.00669032	0.0194921	0.0236573	0.0238056	0.85	0.85	'SI'
OLQDR	RIAL	0.03459	0.00669032	0.013984	0.0280356	0.0238056	0.9315	0.9225	'SI'
SMDDR	RIGR	0.0680755	0.00669032	0.0132784	0.0222603	0.0238056	0.9335	0.9435	'MI'
DD01	DA03	0.020528	0.0332946	0.0183342	0.015441	0.0208644	0.8	0.9405	'MM'
AVAL	AVBL	0.0450157	0.0231967	0.0739453	0.0273558	0.03123	0.915	0.924	'II'
SMDVL	VD03	0.0160266	0.0126902	0.0569927	0.0264934	0.0330941	0.75	0.9145	'MM'
DD03	ALNL	0.0839805	0.0795596	0.0794398	0.0211937	0.025573	0.9525	0.944	'MS'
ADAR	DD03	0.0775574	0.0743783	0.0794398	0.0211937	0.025573	0.945	0.944	'MI'
ADLR	DD03	0.0802422	0.0743783	0.0794398	0.0211937	0.025573	0.9485	0.921	'MS'
AINR	DD03	0.0841761	0.0743783	0.0794398	0.0211937	0.025573	0.958	0.921	'MI'
ASEL	DD03	0.0837165	0.0743783	0.0794398	0.0211937	0.025573	0.953	0.921	'MS'
AVKL	DD03	0.0920221	0.0795596	0.0794398	0.0248278	0.025573	0.961	0.943	'MI'
AWAL	DD03	0.0909089	0.0837739	0.0794398	0.0211937	0.025573	0.96	0.921	'MS'
AWCL	DD03	0.0841761	0.0743783	0.0794398	0.0211937	0.025573	0.9535	0.944	'MS'
IL1L	DD03	0.0914546	0.0743783	0.0794398	0.0211937	0.025573	0.9655	0.944	'MS'
IL2DL	DD03	0.0781091	0.0743783	0.0794398	0.0211937	0.025573	0.951	0.944	'MS'
IL2DR	DD03	0.0936759	0.0837739	0.0794398	0.0211937	0.025573	0.9675	0.921	'MS'
IL2L	DD03	0.0869141	0.0743783	0.0794398	0.0211937	0.025573	0.957	0.921	'MS'
IL2R	DD03	0.0815865	0.0795596	0.0794398	0.0211937	0.025573	0.9555	0.944	'MS'
IL2VR	DD03	0.0914546	0.0743783	0.0794398	0.0211937	0.025573	0.9655	0.921	'MS'
SAADL	DD03	0.0842827	0.0743783	0.0794398	0.0217195	0.025573	0.9585	0.9245	'MI'
SAADR	DD03	0.0842282	0.0743783	0.0794398	0.0217195	0.025573	0.944	0.9475	'MI'
SAAVR	DD03	0.0874074	0.0795596	0.0794398	0.0211937	0.025573	0.9515	0.921	'MI'
SDQR	DD03	0.0781091	0.0743783	0.0794398	0.0217195	0.025573	0.946	0.9245	'MI'
SIADR	DD03	0.0811672	0.0743783	0.0794398	0.0211937	0.025573	0.955	0.921	'MI'
SIAVL	DD03	0.0808084	0.0743783	0.0794398	0.0211937	0.025573	0.9485	0.921	'MI'
SMBDR	DD03	0.0802292	0.0795596	0.0794398	0.0211937	0.025573	0.943	0.921	'MM'
SMBVR	DD03	0.0781091	0.0795596	0.0794398	0.0248278	0.025573	0.951	0.943	'MM'
URAVR	DD03	0.0781091	0.0743783	0.0794398	0.0211937	0.025573	0.951	0.921	'MS'
URBL	DD03	0.0842827	0.0743783	0.0794398	0.0211937	0.025573	0.9535	0.921	'MS'
URYVL	DD03	0.0808084	0.0795596	0.0794398	0.0211937	0.025573	0.9545	0.921	'MS'
AIZL	DD03	0.0745681	0.0743783	0.0794398	0.0217195	0.025573	0.9365	0.9475	'MI'
ASJR	DD03	0.0775574	0.0795596	0.0794398	0.0211937	0.025573	0.945	0.921	'MS'
OLQDR	DD03	0.0874074	0.0743783	0.0794398	0.0211937	0.025573	0.9615	0.921	'MS'
SMBVL	DD03	0.0808084	0.0795596	0.0794398	0.0211937	0.025573	0.9545	0.944	'MM'
AWBR	DD03	0.0775574	0.0743783	0.0794398	0.0248278	0.025573	0.945	0.9635	'MS'
RMGL	DD03	0.0839805	0.0737959	0.0794398	0.0211937	0.025573	0.958	0.9215	'MM'
CEPDL	DD03	0.087107	0.0737959	0.0794398	0.0211937	0.025573	0.9565	0.921	'MS'
URXL	DD03	0.0867724	0.0743783	0.0748703	0.0211937	0.025573	0.961	0.944	'MS'
DD03	HSNL	0.091361	0.0721823	0.0794398	0.0211937	0.025573	0.9655	0.921	'MM'
DD03	PLNR	0.0802806	0.0743783	0.0794398	0.0211937	0.025573	0.948	0.944	'MS'
DD02	VD08	0.0277799	0.0581326	0.0936534	0.0472035	0.0420609	0.8	0.935	'MM'
AVAL	AS02	0.0306227	0.0196172	0.0800284	0.0250855	0.0274192	0.85	0.9425	'MI'
AVAL	AS03	0.046195	0.0196172	0.0778706	0.0250855	0.0274192	0.9385	0.9425	'MI'
AVAL	AS04	0.0353497	0.0197961	0.0865803	0.0250855	0.0274192	0.9	0.9425	'MI'
AVAL	AS05	0.0419179	0.0197961	0.0804629	0.0250855	0.0274192	0.9255	0.9425	'MI'
AVAL	AS06	0.0464317	0.0197961	0.0804629	0.0250855	0.0274192	0.939	0.9425	'MI'
AVAL	AS07	0.0451354	0.0186994	0.0793908	0.0250855	0.0274192	0.9455	0.9425	'MI'
AVAL	AS08	0.0451354	0.0186994	0.0855253	0.0250855	0.0274192	0.9455	0.9425	'MI'
AVAL	AS09	0.0451354	0.0186994	0.0855253	0.0250855	0.0274192	0.9365	0.9425	'MI'
AVAL	AS10	0.0406052	0.0186994	0.0793908	0.0250855	0.0274192	0.9315	0.9425	'MI'
AVAL	AS11	0.0451354	0.0186994	0.0855253	0.0250855	0.0274192	0.9455	0.9425	'MI'
ALA	AVAL	0.0451354	0.0186994	0.0793908	0.0250855	0.0274192	0.9455	0.9425	'II'
AVAL	AVHR	0.0466702	0.0186994	0.0800718	0.0241474	0.0274192	0.939	0.9375	'II'
AVAL	AVM	0.0451354	0.0186994	0.0800718	0.0250855	0.0274192	0.934	0.9425	'SI'
AVAL	BDUR	0.0340703	0.0186994	0.0800718	0.0250855	0.0274192	0.905	0.9425	'II'
AVAL	DA01	0.0392871	0.0364289	0.0188595	0.0250855	0.0274192	0.85	0.9425	'MI'
AVAL	DA02	0.0521	0.0256227	0.0315671	0.0287197	0.0274192	0.938	0.9585	'MI'
AVAL	DA03	0.0464317	0.0197961	0.0830915	0.0250855	0.0274192	0.9395	0.9425	'MI'
AVAL	DA04	0.0464317	0.0197961	0.0804629	0.0250855	0.0274192	0.9395	0.9425	'MI'
AVAL	DA05	0.0464317	0.0197961	0.0804629	0.0250855	0.0274192	0.9385	0.9425	'MI'
AVAL	DA06	0.0390858	0.0124502	0.0755917	0.0250855	0.0274192	0.926	0.9425	'MI'
AVAL	DA08	0.0451354	0.0186994	0.0819296	0.0250855	0.0274192	0.9455	0.9425	'MI'
AVAL	DA09	0.0451354	0.0186994	0.0855253	0.0250855	0.0274192	0.9455	0.9425	'MI'
AVAL	DB01	0.046195	0.0196172	0.0800284	0.0250855	0.0274192	0.939	0.9425	'MI'
AVAL	DB02	0.046195	0.0196172	0.0800284	0.0250855	0.0274192	0.939	0.9425	'MI'
AVAL	DB03	0.0419179	0.0197961	0.0804629	0.0250855	0.0274192	0.9255	0.9425	'MI'
AVAL	DB04	0.0464317	0.0197961	0.0865803	0.0250855	0.0274192	0.939	0.9425	'MI'
AVAL	DB05	0.0451354	0.0186994	0.0793908	0.0250855	0.0274192	0.9455	0.9425	'MI'
AVAL	DB06	0.0451354	0.0186994	0.0793908	0.0250855	0.0274192	0.9455	0.9425	'MI'
AVAL	DB07	0.0451354	0.0186994	0.0793908	0.0250855	0.0274192	0.9455	0.9425	'MI'
AVAL	DD05	0.0439197	0.0186994	0.0855253	0.0250855	0.0274192	0.907	0.9425	'MI'
AVAL	DVA	0.0376362	0.025921	0.0819296	0.0250855	0.0274192	0.85	0.9425	'II'
AVAL	DVB	0.0451354	0.0186994	0.0800718	0.0250855	0.0274192	0.935	0.9425	'MI'
AVAL	FLPR	0.0451354	0.0186994	0.0855253	0.0250855	0.0274192	0.934	0.9425	'SI'
AVAL	LUAL	0.0451354	0.0186994	0.0793908	0.0250855	0.0274192	0.9455	0.9425	'II'
AVAL	LUAR	0.0451354	0.0186994	0.0793908	0.0250855	0.0274192	0.935	0.9425	'II'
AVAL	PDA	0.0451354	0.0186994	0.0800718	0.0250855	0.0274192	0.9455	0.9425	'MI'
AVAL	PDB	0.0451354	0.0186994	0.0800718	0.0250855	0.0274192	0.9455	0.9425	'MI'
AVAL	PDEL	0.0451354	0.0186994	0.0855253	0.0250855	0.0274192	0.9365	0.9425	'SI'
AVAL	PDER	0.0123554	0.0247274	0.0697994	0.0250855	0.0274192	0.55	0.9425	'SI'
AVAL	PHBL	0.0451354	0.0186994	0.0793908	0.0250855	0.0274192	0.935	0.9425	'SI'
AVAL	PHCL	0.0451354	0.0186994	0.0793908	0.0250855	0.0274192	0.9255	0.9425	'SI'
AVAL	PHCR	0.0451354	0.0186994	0.0855253	0.0250855	0.0274192	0.935	0.9425	'SI'
AVAL	PLML	0.0451354	0.0186994	0.0793908	0.0250855	0.0274192	0.9455	0.9425	'SI'
AVAL	PLMR	0.0451354	0.0186994	0.0793908	0.0250855	0.0274192	0.934	0.9425	'SI'
AVAL	PQR	0.0425602	0.0186994	0.0793908	0.0250855	0.0274192	0.938	0.9425	'SI'
AVAL	PVCL	0.0228503	0.0186994	0.0739453	0.0250855	0.0274192	0.8	0.9425	'II'
AVAL	PVCR	0.0451354	0.0186994	0.0765736	0.0250855	0.0274192	0.935	0.9425	'II'
AVAL	PVDL	0.0451354	0.0186994	0.0855253	0.0250855	0.0274192	0.9455	0.9425	'II'
AVAL	PVDR	0.0451354	0.0186994	0.0855253	0.0250855	0.0274192	0.935	0.9425	'II'
AVAL	PVM	0.0451354	0.0186994	0.0800718	0.0250855	0.0274192	0.9455	0.9425	'SI'
AVAL	PVNR	0.0340703	0.0186994	0.0811356	0.0250855	0.0274192	0.905	0.9425	'II'
AVAL	PVWL	0.0451354	0.0186994	0.0793908	0.0250855	0.0274192	0.9455	0.9425	'II'
AVAL	PVWR	0.0406052	0.0186994	0.0793908	0.0250855	0.0274192	0.9315	0.9425	'II'
AVAL	SABD	0.0417378	0.0196172	0.0771895	0.0250855	0.0274192	0.917	0.9425	'II'
AVAL	SABVL	0.046195	0.0196172	0.0795219	0.0250855	0.0274192	0.9385	0.9425	'II'
AVAL	SABVR	0.046195	0.0196172	0.0765324	0.0250855	0.0274192	0.9385	0.9425	'II'
AVAL	VA01	0.046195	0.0196172	0.0800284	0.0287197	0.0274192	0.931	0.9585	'MI'
AVAL	VA03	0.046195	0.0196172	0.0800284	0.0287197	0.0274192	0.938	0.9585	'MI'
AVAL	VA04	0.0464317	0.0197961	0.0865803	0.0250855	0.0274192	0.939	0.9425	'MI'
AVAL	VA05	0.0464317	0.0197961	0.081119	0.0250855	0.0274192	0.9395	0.9425	'MI'
AVAL	VA06	0.0464317	0.0197961	0.081119	0.0250855	0.0274192	0.9395	0.9425	'MI'
AVAL	VA07	0.0464317	0.0197961	0.0804629	0.0250855	0.0274192	0.939	0.9425	'MI'
AVAL	VA08	0.0464317	0.0197961	0.0202437	0.0250855	0.0274192	0.9305	0.925	'MI'
AVAL	VA10	0.0343193	0.0186994	0.0855253	0.0250855	0.0274192	0.906	0.9425	'MI'
AVAL	VA12	0.0451354	0.0186994	0.0855253	0.0250855	0.0274192	0.9455	0.9425	'MI'
AVAL	VB02	0.046195	0.0196172	0.0807095	0.0250855	0.0274192	0.927	0.9425	'MI'
AVAL	VB03	0.0464317	0.0197961	0.0865803	0.0250855	0.0274192	0.9395	0.9425	'MI'
AVAL	VB05	0.0464317	0.0197961	0.0865803	0.0250855	0.0274192	0.939	0.9425	'MI'
AVAL	VB06	0.0464317	0.0197961	0.0865803	0.0250855	0.0274192	0.9395	0.9425	'MI'
AVAL	VB07	0.0451354	0.0186994	0.0750094	0.0250855	0.0274192	0.9455	0.9425	'MI'
AVAL	VB08	0.0439197	0.0186994	0.0800718	0.0250855	0.0274192	0.9235	0.9425	'MI'
AVAL	VB09	0.0233144	0.0186994	0.0855253	0.0250855	0.0274192	0.8	0.925	'MI'
AVAL	VB10	0.0407038	0.0186994	0.0793908	0.0250855	0.0274192	0.932	0.9425	'MI'
AVAL	VB11	0.0451354	0.0186994	0.0793908	0.0250855	0.0274192	0.9455	0.9425	'MI'
AVAL	VC01	0.046195	0.0196172	0.0800284	0.0250855	0.0274192	0.9385	0.9425	'MI'
AVAL	VC02	0.0464317	0.0197961	0.0865803	0.0250855	0.0274192	0.939	0.9425	'MI'
AVAL	VD07	0.0464317	0.0197961	0.0755917	0.0250855	0.0274192	0.9305	0.9425	'MI'
AVAL	VD09	0.0439197	0.0186994	0.0855253	0.0288665	0.0274192	0.925	0.959	'MI'
AVAL	VD10	0.0509064	0.025921	0.0892306	0.0287197	0.0274192	0.9185	0.9585	'MI'
AVAL	VD11	0.0451354	0.0186994	0.0793908	0.0250855	0.0274192	0.9455	0.9425	'MI'
AVAL	VD12	0.0406052	0.0186994	0.0855253	0.0250855	0.0274192	0.9205	0.9425	'MI'
AVAL	VD13	0.0340703	0.0186994	0.0819296	0.0250855	0.0274192	0.85	0.9425	'MI'
FLPL	VD03	0.0157731	0.0187323	0.0638483	0.0246191	0.0274215	0.75	0.9285	'MS'
VD03	DD04	0.0553033	0.0474262	0.0610234	0.0229631	0.0274192	0.93	0.9	'MM'
URBL	AVJR	0.0141871	0.00812384	0.0209406	0.023935	0.0254717	0.7	0.928	'SI'
AWBR	AVJR	0.0136209	0.00812384	0.0209406	0.023935	0.0254717	0.65	0.948	'SI'
AVJR	SMBVR	0.0141871	0.00812384	0.0154354	0.023935	0.0254717	0.7	0.928	'MI'
AVAL	ASKL	0.0422368	0.0208108	0.081542	0.0269547	0.0292876	0.926	0.9515	'SI'
AVAL	ASKR	0.0466702	0.0280356	0.0863282	0.0305845	0.0292876	0.939	0.9495	'SI'
AVG	PVPL	0.0182701	0.012265	0.00607563	0.0220708	0.023599	0.8	0.917	'SI'
AIBL	PVPL	0.026392	0.0216069	0.00816256	0.0253363	0.026873	0.85	0.9365	'II'
AVER	AVG	0.0255629	0.0145538	0.0154383	0.0269576	0.028497	0.85	0.935	'SI'
AVER	HSNR	0.0141309	0.0145538	0.0147317	0.0269576	0.028497	0.65	0.935	'MI'
AVER	VC05	0.0229973	0.0138915	0.0220001	0.0269576	0.028497	0.8	0.935	'MI'
IL2DL	RMDDR	0.0124631	0.00669032	0.013984	0.0294369	0.0298835	0.5	0.943	'MS'
RMDDR	AINR	0.0136885	0.00669032	0.013984	0.0294369	0.0298835	0.65	0.9285	'MI'
RMDDR	AIZL	0.0200624	0.00669032	0.013984	0.0294369	0.0298835	0.8	0.943	'MI'
RMDDR	ALNL	0.0124631	0.00669032	0.0194921	0.0294369	0.0298835	0.5	0.943	'MS'
RMDDR	ASEL	0.0136885	0.00669032	0.013984	0.0294369	0.0298835	0.65	0.9285	'MS'
RMDDR	DD06	0.0203659	0.0153576	0.0209406	0.0294369	0.0298835	0.85	0.918	'MM'
RMDDR	HSNL	0.025152	0.00812384	0.00670825	0.0294369	0.0298835	0.9535	0.9285	'MM'
RMDDR	RIGR	0.0198226	0.00669032	0.013984	0.0294369	0.0298835	0.8	0.929	'MI'
AWCL	RMDDR	0.0210479	0.00669032	0.0194921	0.0294369	0.0298835	0.85	0.943	'MS'
IL2L	RMDDR	0.017843	0.00669032	0.0139867	0.0294369	0.0298835	0.8	0.9285	'MS'
CEPDL	RMDDR	0.0124631	0.00669032	0.0139867	0.0294369	0.0298835	0.5	0.9285	'MS'
IL1L	RMDDR	0.0124631	0.00669032	0.013984	0.0294369	0.0298835	0.5	0.943	'MS'
IL2DR	RMDDR	0.0124631	0.00669032	0.013984	0.0294369	0.0298835	0.5	0.9285	'MS'
IL2R	RMDDR	0.0124631	0.00669032	0.013984	0.0294369	0.0298835	0.5	0.943	'MS'
IL2VR	RMDDR	0.0124631	0.00669032	0.013984	0.0294369	0.0298835	0.5	0.9285	'MS'
OLQVL	RMDDR	0.0124631	0.00669032	0.013984	0.0294369	0.0298835	0.5	0.9285	'MS'
URAVR	RMDDR	0.0124631	0.00669032	0.013984	0.0294369	0.0298835	0.5	0.9285	'MS'
URXL	RMDDR	0.0124631	0.00669032	0.013984	0.0294369	0.0298835	0.5	0.943	'MS'
OLQDR	RMDDR	0.0124631	0.00669032	0.013984	0.0294369	0.0298835	0.5	0.9285	'MS'
RMDDR	RMFR	0.017843	0.00669032	0.00670825	0.0294369	0.0298835	0.8	0.9285	'MM'
RMDDR	SIADR	0.0124631	0.00669032	0.0139867	0.0294369	0.0298835	0.5	0.9285	'MI'
RMDDR	SIAVL	0.0124631	0.00669032	0.0139867	0.0294369	0.0298835	0.5	0.9285	'MI'
RMDDR	SMBDR	0.0124631	0.00669032	0.0194921	0.0294369	0.0298835	0.5	0.9285	'MM'
RMDDR	SMBVL	0.0124631	0.00669032	0.013984	0.0294369	0.0298835	0.5	0.943	'MM'
RMDVR	CEPDR	0.00629055	0.0131157	0.013984	0.0231527	0.0298937	0.25	0.9105	'MS'
CEPVR	RMDVR	0.0251756	0.0131157	0.013984	0.0231527	0.0298937	0.85	0.928	'MS'
RMDVR	SIADL	0.0324921	0.0131157	0.013984	0.0214817	0.0298937	0.929	0.85	'MI'
RIMR	DD01	0.0351473	0.0416202	0.0208583	0.0211937	0.0273272	0.9375	0.9555	'MM'
AVHL	FLPL	0.00725625	0.00601571	0.00607563	0.0159505	0.0273272	0.3	0.85	'SI'
RMER	RIAR	0.0124631	0.0139273	0.0194921	0.0294369	0.0298835	0.5	0.9225	'MI'
IL1DL	RIAR	0.0124631	0.0139273	0.013984	0.0294369	0.0298835	0.5	0.9285	'SI'
IL1DR	RIAR	0.0124631	0.0139273	0.013984	0.0294369	0.0298835	0.5	0.9285	'SI'
IL1VL	RIAR	0.0124631	0.0139273	0.013984	0.0294369	0.0298835	0.5	0.9285	'SI'
RIAR	RIH	0.0124631	0.0139273	0.013984	0.0294369	0.0298835	0.5	0.9195	'II'
RIAR	SIBVR	0.0124631	0.0139273	0.013984	0.0294369	0.0298835	0.5	0.9105	'II'
DD04	AS08	0.0503235	0.0635099	0.0265396	0.0191211	0.0206493	0.943	0.9295	'MM'
DD04	AS09	0.0610775	0.0542031	0.0265396	0.0191211	0.0206493	0.957	0.9295	'MM'
DD04	AS10	0.0564402	0.0611863	0.0265396	0.0191211	0.0206493	0.9555	0.9295	'MM'
DD04	AS11	0.0601	0.0635099	0.0265396	0.0191211	0.0206493	0.962	0.9295	'MM'
DD04	DA07	0.0338191	0.0611863	0.0265396	0.0191211	0.0206493	0.85	0.9295	'MM'
DD04	DB07	0.0393122	0.0635099	0.0265396	0.0191211	0.0206493	0.9095	0.9295	'MM'
VC04	DD04	0.0488073	0.0582808	0.0315847	0.0191211	0.0206493	0.9305	0.906	'MM'
SABVL	DD04	0.0438111	0.059035	0.0298735	0.0191211	0.0206493	0.916	0.9295	'MI'
ADAL	DD04	0.0333992	0.0635099	0.0265396	0.0191211	0.0206493	0.85	0.9295	'MI'
AS07	DD04	0.0670893	0.0635099	0.0265396	0.0191211	0.0206493	0.9715	0.9295	'MM'
RIFR	DD04	0.0334949	0.0611863	0.0265396	0.0191211	0.0206493	0.85	0.9295	'MI'
AS01	DD04	0.0492269	0.0621534	0.0243285	0.0191211	0.0206493	0.932	0.9295	'MM'
AS03	DD04	0.0671045	0.0546005	0.0243285	0.0191211	0.0206493	0.965	0.9295	'MM'
AS04	DD04	0.0576763	0.0605708	0.0243285	0.0191211	0.0206493	0.9505	0.9295	'MM'
[truncated: 36,782 more rows]

## Sheet: Signal Propagation 
Neuron	qmax	peaktime	classification	qmax	peaktime	classification	qmax	peaktime	classification	qmax	peaktime	classification
Scenario	i1			i2			i3			i4
IL2DL	1.00522	7.07946	O	1.00088	10	O	1.00685	7.07946	O	1.00008	14.1254	O		O – overshooting
IL2VL	1	100		1.00928	6.30957	O	1	100		1.003	12.5893	O		SR – strong response
IL2L	1	100	O	2.48449	1.41254	SR	1	100		1.03524	4.46684	O
URADL	1.10077	3.98107	O	4.15456	1.25893	SR	1.00309	8.91251	O	1.00128	11.2202	O
IL1VL	1	100		1.02637	7.07946	O	1	100		1.00902	12.5893	O
IL2DR	1.00522	7.07946	O	1.00088	10	O	1.00685	7.07946	O	1.00008	14.1254	O
IL1DL	1.00232	7.94328	O	1.14177	3.54813	O	1	100		1.00627	12.5893	O
OLLL	1	100		1.92074	1.77828	SR	1	100		1.008	10	O
IL1L	1	100		1.29514	2.23872	O	1	100		1.00276	14.1254	O
URYDL	1	100		1.00131	14.1254	O	1	100		1.01146	12.5893	O
OLQDL	1	100		1.07706	4.46684	O	1	100		1.01281	12.5893	O
URYDR	1.00596	7.94328	O	1.24016	3.16228	O	1.01262	6.30957	O	1.01264	7.07946	O
IL2R	1	100	O	1.01433	6.30957	O	1	100		1.03573	3.98107	O
URYVL	1.00236	8.91251	O	1.05156	4.46684	O	1	100	O	1.00015	15.8489	O
RIPL	1.01137	7.07946	O	1.15264	3.98107	O	1	100		1.10134	1.58489	O
OLLR	1	100		1.5374	1.99526	O	1	100		1.07594	2.23872	O
URBL	1	100		1.31117	2.51189	O	1	100		1.00401	14.1254	O
IL2VR	1	100	O	1.03033	4.46684	O	1	100	O	1.02709	3.98107	O
IL1DR	1	100		1.02513	6.30957	O	1	100		1.00773	12.5893	O
URADR	1.00361	7.94328	O	2.99831	1.41254	SR	1.00566	7.94328	O	1.00058	12.5893	O
IL1R	1	100		1.00797	7.94328	O	1	100		1.0089	11.2202	O
URAVL	1	100	O	1.02393	4.46684	O	1	100	O	1.00182	11.2202	O
OLQVL	1	100		1.13666	3.54813	O	1	100		1.27327	1.25893	O
RMED	1.0267	7.07946	O	1.0403	7.07946	O	1	100		1.01871	10	O
URBR	1	100		1.02168	6.30957	O	1	100		1.00599	12.5893	O
OLQDR	1	100		1.08288	5.01187	O	1	100		1.01581	11.2202	O
URYVR	1	100	O	1.13127	3.98107	O	1	100		1.0207	7.94328	O
RIPR	1.00068	7.94328	O	1.0542	5.62341	O	1	100		1.00745	11.2202	O
RMEL	1	100		1.02529	5.62341	O	1	100		1.00473	12.5893	O
BAGL	1	100		1.891	1.99526	SR	1	100		1.02573	8.91251	O
CEPVL	1	100		2.63265	1.25893	SR	1	100		1.0326	7.94328	O
BAGR	1	100	O	1.67251	1.99526	SR	1	100	O	1.0053	10	O
OLQVR	1	100		1.06708	3.98107	O	1	100		1.01764	11.2202	O
URAVR	1.00067	8.91251	O	1.01025	5.62341	O	1.00116	8.91251	O	1.00833	5.01187	O
RMER	1	100		1.029	6.30957	O	1	100		1.01018	11.2202	O
IL1VR	1	100		1.03446	5.01187	O	1	100		1.00497	11.2202	O
RID	1.64664	3.16228	O	1.17638	3.54813	O	1.70354	3.54813	SR	1.00812	8.91251	O
CEPVR	1	100		2.41691	1.25893	SR	1	100		2.68133	1.25893	SR
RMEV	1	100		1.0208	7.94328	O	1	100		1.01707	10	O
CEPDL	1	100		3.86969	1.12202	SR	1	100		1.00538	12.5893	O
RMDVL	1	100		1.0031	14.1254	O	1	100		1.03094	12.5893	O
SAAVL	1	100		1.00299	11.2202	O	1	100		1.11467	6.30957	O
SMDVL	1	100		1.00814	8.91251	O	1	100		1.08897	7.07946	O
URXL	1.01506	5.62341	O	1.19785	3.16228	O	1	100		1.0252	5.62341	O
ALA	1.06756	5.01187	O	1.67249	1.58489	SR	1.07901	5.62341	O	3.74679	1.12202	SR
RMDVR	1	100		1.00542	12.5893	O	1	100		1.03768	11.2202	O
CEPDR	1	100		2.66436	1.25893	SR	1	100		1.00924	12.5893	O
AVAL	1.4283	2.23872	O	1.24172	2.81838	O	1.688	1.99526	SR	1.01686	7.94328	O
RIAL	1	100		1.01894	7.07946	O	1	100		1.1571	5.62341	O
ASKL	1	100		1.00535	10	O	2.42334	2.81838	SR	79.563	0.001	INPUT
SAAVR	1.03494	4.46684	O	1.00571	10	O	1	100		1.14924	6.30957	O
RMDL	1	100		1.00389	11.2202	O	1	100		1.06229	7.94328	O
URXR	1	100		1.01367	7.07946	O	1	100		1.0662	3.98107	O
SMDVR	1	100		1.03693	5.62341	O	1	100		1.08064	7.94328	O
AFDL	1	100	O	1.00118	11.2202	O	1.01327	8.91251	O	1.70103	3.54813	SR
AVAR	1.40563	2.51189	O	1.15438	3.98107	O	1.7027	2.23872	SR	1.0395	5.62341	O
RIAR	1	100		1.01041	8.91251	O	1	100		1.15097	6.30957	O
ASKR	1.00213	12.5893	O	1.00819	7.07946	O	1.21635	4.46684	O	126.071	0.001	INPUT
AVEL	1.32282	2.81838	O	1.37324	2.81838	O	1	100		1.09496	6.30957	O
ADLL	1	100		1.08916	4.46684	O	1.06071	4.46684	O	187.604	0.001	INPUT
ADFL	1.05837	5.01187	O	1.03934	5.62341	O	1.01585	7.94328	O	5.15696	1.25893	SR
RMDR	1	100		1.01133	7.94328	O	1	100		1.07175	7.94328	O
AFDR	1	100	O	1.00253	8.91251	O	1.01355	8.91251	O	2.04569	3.16228	SR
SIBDL	1	100		1.17222	3.98107	O	1	100		1.01347	11.2202	O
RIH	1	100		1.9811	1.77828	SR	1	100		1.01254	11.2202	O
AWBL	1.33459	2.81838	O	1.1452	3.54813	O	1.0257	6.30957	O	3.19819	1.25893	SR
AVER	1	100		1.20167	3.16228	O	1	100		1.08537	6.30957	O
RMDDL	1	100		1.00646	11.2202	O	1	100		1.04009	11.2202	O
AWCL	1.00003	17.7828	O	1.00053	14.1254	O	1.02575	7.94328	O	2.8915	2.81838	SR
ADFR	1.00167	12.5893	O	1.03105	5.01187	O	1.10707	5.01187	O	3.17714	1.77828	SR
ASGL	1	100		1.00159	11.2202	O	1.04751	6.30957	O	2.35538	2.51189	SR
SAADL	1.11652	5.01187	O	1.3565	1.77828	O	1	100	O	1.32455	3.98107	O
ADLR	1.00072	12.5893	O	1.00242	10	O	1.20671	3.54813	O	205.754	0.001	INPUT
AWAL	1	100	O	1.00063	14.1254	O	1.03515	7.07946	O	2.16087	2.81838	SR
AWBR	1.29466	2.81838	O	1.08323	4.46684	O	1.08999	5.01187	O	1.34794	3.16228	O
ASIL	1	100	O	1.00109	12.5893	O	1.138	5.01187	O	3.40145	2.51189	SR
ASHL	1.04378	3.98107	O	1.14621	3.98107	O	1.03777	6.30957	O	143.663	0.001	INPUT
SIBDR	1	100		1.02449	5.62341	O	1	100		1.02115	12.5893	O
ASGR	1.00001	15.8489	O	1.00298	8.91251	O	1.01606	8.91251	O	3.24695	2.51189	SR
AIBL	1	100		1.03984	5.01187	O	1.01666	7.94328	O	5.14738	1.58489	SR
ASHR	1.05725	3.54813	O	1.02784	5.62341	O	1.01136	7.94328	O	124.883	0.001	INPUT
AWCR	1	100	O	1.0008	12.5893	O	1.05715	7.07946	O	6.13145	1.77828	SR
AWAR	1.0005	15.8489	O	1.00099	11.2202	O	1.04643	7.07946	O	4.83883	1.77828	SR
SIBVL	1	100		1.18511	3.98107	O	1	100		1.01204	11.2202	O
RIVL	1	100		1.02473	5.62341	O	1	100		1.13545	5.62341	O
SMDDL	1	100		1.02707	6.30957	O	1	100		1.13556	6.30957	O
SAADR	1.04866	3.98107	O	1.00074	14.1254	O	1	100		1.11719	5.62341	O
RMHL	1	100		1.31871	3.16228	O	1	100		1.0142	11.2202	O
RMDDR	1	100		1.00296	14.1254	O	1	100		1.03136	11.2202	O
ASIR	1.00053	12.5893	O	1.00069	12.5893	O	1.02622	7.94328	O	3.57407	2.23872	SR
AVHL	1.02052	7.07946	O	2.78047	1.41254	SR	4.04186	1.58489	SR	1.09658	5.01187	O
AVHR	1.00807	7.94328	O	1.04529	5.62341	O	5.7183	1.41254	SR	1.0865	5.62341	O
RIVR	1	100		1.03332	5.62341	O	1	100		1.13681	5.62341	O
AIBR	1	100	O	1.0172	5.01187	O	1	100	O	5.61733	1.77828	SR
RIBL	1	100		2.86953	1.25893	SR	1	100		1.07936	6.30957	O
RMFL	1	100		1	35.4813	O	1	100		1.01693	8.91251	O
AVBL	1.28475	3.98107	O	1.388	2.23872	O	1.27011	4.46684	O	1.52396	1.77828	O
SIBVR	1	100		1.06978	5.01187	O	1	100		1.0199	12.5893	O
ASEL	1.00055	11.2202	O	1.00068	12.5893	O	1.01355	8.91251	O	1.62645	3.98107	O
AVJR	1.32373	3.54813	O	3.2293	1.58489	SR	1.70715	3.54813	SR	3.24234	1.25893	SR
AUAL	1.24638	3.16228	O	1.17725	3.54813	O	1	100		1.10001	4.46684	O
SIADL	1	100		71.5027	0.001	INPUT	1	100		1.04995	7.94328	O
RMHR	1	100		1.23861	3.16228	O	1	100		1.00086	15.8489	O
AVJL	1.70191	2.81838	SR	2.57823	2.23872	SR	1.85184	3.16228	SR	1.38913	2.81838	O
ASER	1	100	O	1.00205	11.2202	O	1.12617	5.62341	O	6.59893	1.77828	SR
AVBR	1.15155	4.46684	O	1.22526	2.81838	O	1.24524	3.98107	O	1.16032	3.98107	O
RIBR	1	100		2.73344	1.25893	SR	1	100		1.07738	7.07946	O
RMFR	1.00006	25.1189	O	1	100	O	1.00006	25.1189	O	1.05949	6.30957	O
SMDDR	1	100		1.00179	11.2202	O	1	100		1.16007	5.62341	O
AIAL	1	100		1.00369	11.2202	O	1.67698	3.54813	SR	13.4135	1.12202	SR
RIR	1.69666	2.51189	SR	1.2092	3.54813	O	1.36929	3.16228	O	1.14185	4.46684	O
SMBDL	1.76346	2.81838	SR	1.07334	4.46684	O	1	100		1.15798	5.62341	O
RIML	1.00057	6.30957	O	1.01345	7.07946	O	1	100		2.19132	3.16228	SR
ASJL	1.00393	8.91251	O	1.00671	7.94328	O	1.50821	3.16228	O	1.38612	2.81838	O
RIMR	1	100		1.02018	7.07946	O	1	100		1.64242	3.54813	O
AUAR	1.36333	2.81838	O	1.01356	7.07946	O	1.01749	7.07946	O	1.19096	3.98107	O
AVDR	2.72598	1.41254	SR	3.1627	1.41254	SR	2.36543	1.99526	SR	4.15086	1.12202	SR
SMBVR	1.64496	2.81838	O	1.01876	6.30957	O	1.02132	5.01187	O	1.09711	6.30957	O
AVDL	2.30202	2.23872	SR	3.83101	1.41254	SR	2.87071	1.99526	SR	5.2344	1.12202	SR
AINL	1.00519	7.94328	O	1.52955	1.58489	O	1.00558	8.91251	O	1.12831	4.46684	O
SMBVL	1.85462	2.81838	SR	1.00704	8.91251	O	1.03498	5.62341	O	1.25798	4.46684	O
ASJR	1.18904	2.81838	O	1.01031	5.62341	O	1.03608	5.62341	O	1.15588	3.54813	O
AINR	1.00041	8.91251	O	1.00298	8.91251	O	1.00684	8.91251	O	1.17419	4.46684	O
SIADR	1	100		85.42	0.001	INPUT	1	100		1.03103	8.91251	O
AVL	1.00733	12.5893	O	1.00792	3.54813	O	1.01366	10	O	1	100
RICL	1	100		1.18704	3.54813	O	1	100		2.61846	1.25893	SR
AIAR	1.00074	14.1254	O	1.00184	10	O	1.08369	6.30957	O	16.1992	1.12202	SR
SMBDR	1.33605	2.81838	O	1.23845	3.16228	O	1	100		1.09847	6.30957	O
AIZR	1	100	O	1.02911	5.62341	O	1.00595	10	O	2.10639	3.54813	SR
SIAVL	1	100		1.21269	3.16228	O	1	100		1.0472	7.07946	O
SIAVR	1	100		1.1937	3.16228	O	1	100		1.02911	8.91251	O
RICR	1	100		1.17746	3.54813	O	1	100		2.23011	1.25893	SR
AIZL	1.42495	2.81838	O	1.00742	7.94328	O	1.03403	7.07946	O	2.00933	3.16228	SR
AIYR	1	100	O	1.00116	12.5893	O	1.02065	8.91251	O	2.64807	3.54813	SR
AIMR	1.00081	11.2202	O	1.00307	7.94328	O	1.01087	7.07946	O	4.49506	1.12202	SR
AIML	1	100		1.0071	10	O	1	100		4.11777	1.41254	SR
RIS	1	100		1.02356	7.07946	O	1	100		1.18354	5.62341	O
AIYL	1	100	O	1.00075	14.1254	O	1.01238	10	O	2.12262	3.98107	SR
VB02	1.00375	15.8489	O	1	100	O	1.00603	15.8489	O	1	100
AVKR	1.01178	5.62341	O	1.13281	3.16228	O	1	35.4813	O	1.01377	8.91251	O
AVKL	4.3999	1.25893	SR	1.11491	2.81838	O	1.00002	28.1838	O	1.00913	8.91251	O
AVFR	1.0394	6.30957	O	1.14782	5.01187	O	2.94814	2.81838	SR	1.18958	5.01187	O
SABVL	1.16132	4.46684	O	1.1763	4.46684	O	1.06823	5.62341	O	1.04215	6.30957	O
FLPL	1.12959	3.98107	O	79.5559	0.001	INPUT	1.11915	4.46684	O	1.32482	3.54813	O
FLPR	1.1204	3.98107	O	114.398	0.001	INPUT	1.14365	3.98107	O	1.33657	2.81838	O
SABVR	1.07042	5.62341	O	1.15544	4.46684	O	1.01635	6.30957	O	1.03272	7.94328	O
AVFL	1.11909	3.54813	O	1.12982	5.01187	O	5.14114	1.58489	SR	1.28825	4.46684	O
AQR	1.5338	2.81838	O	24.4468	0.001	INPUT	1.0526	3.98107	O	1	100
RIFR	1.03599	5.62341	O	1.27823	3.54813	O	1.36999	3.54813	O	4.4977	1.77828	SR
ADEL	1.01326	7.07946	O	75.2761	0.001	INPUT	1.00209	10	O	1.01198	7.07946	O
VB01	1.27135	2.81838	O	1	100	O	1.00032	22.3872	O	1.09294	4.46684	O
ADER	1.23748	3.16228	O	78.1804	0.001	INPUT	1.01735	7.07946	O	1.00982	7.94328	O
DB02	2.20388	2.81838	SR	1.13685	3.98107	O	1.77597	3.16228	SR	1.00726	7.94328	O
ADAR	1.01011	7.07946	O	1.25967	2.51189	O	1.03092	6.30957	O	4.47376	1.58489	SR
ADAL	1.06169	4.46684	O	1.36363	2.23872	O	1.34615	3.54813	O	3.987	1.77828	SR
RIGR	1	100	O	2.46453	1.58489	SR	1	100		1.13576	4.46684	O
RMGL	1	100		1.28826	2.81838	O	1	100		2.35184	1.58489	SR
RMGR	1	100	O	1.06476	5.01187	O	1	100	O	3.94802	1.12202	SR
RIFL	1.00015	25.1189	O	1	100	O	1.00587	3.98107	O	1.51495	2.81838	O
AVG	1.00322	10	O	1.07115	4.46684	O	25.1507	1.12202	SR	1.04398	5.62341	O
VA01	1.00009	28.1838	O	1	100	O	1.00015	25.1189	O	1	100
SABD	1.11417	3.98107	O	1.03355	5.01187	O	1.00008	25.1189	O	1	100
RIGL	1.00006	28.1838	O	1.89913	1.41254	SR	1.00008	28.1838	O	1	100
DD01	1.00189	17.7828	O	1	100		1.00296	17.7828	O	1	100
DB01	1.2643	3.98107	O	1.04319	5.62341	O	1.1254	5.62341	O	1.15189	4.46684	O
AS01	1.00445	6.30957	O	1	100	O	1.0159	5.62341	O	1	100
VD01	1.00073	22.3872	O	1	100	O	1.00109	22.3872	O	1	100
DA01	1.11687	5.01187	O	1.14325	5.01187	O	1.07371	5.62341	O	1.03351	7.94328	O
VD02	1.00152	19.9526	O	1	100		1.00231	19.9526	O	1	100
VA02	1.00094	22.3872	O	1	100		1.00141	22.3872	O	1	100
VB03	1.08016	4.46684	O	1.00807	6.30957	O	1.1731	3.98107	O	1	100
AS02	1.10355	5.01187	O	1.04751	5.62341	O	1.09384	5.01187	O	1.0033	11.2202	O
DB03	2.2516	2.81838	SR	1.173	3.98107	O	1.74893	3.16228	SR	1.00616	8.91251	O
DA02	1.00063	19.9526	O	1	100	O	1.00098	19.9526	O	1	100
VD03	1.0109	12.5893	O	1	100	O	1.01678	12.5893	O	1	100
BDUR	1.03704	6.30957	O	76.0658	0.001	INPUT	1.0693	5.62341	O	1.01016	7.94328	O
BDUL	1.02255	6.30957	O	80.5703	0.001	INPUT	1.01034	7.94328	O	1.01825	7.07946	O
VA03	1.0046	14.1254	O	1	100	O	1.00644	14.1254	O	1	100
SDQR	1	100		1.09498	5.01187	O	1	100		1.02676	7.94328	O
VB04	1.09714	6.30957	O	1.00562	11.2202	O	1.11384	7.07946	O	1	100
VC01	1.00183	17.7828	O	1	100	O	1.00293	17.7828	O	1	100
DD02	1.02281	11.2202	O	1	100	O	1.0347	11.2202	O	1	100
AS03	1.08459	5.62341	O	1.04623	5.62341	O	1.12105	5.01187	O	1.00121	10	O
VD04	1.02249	11.2202	O	1	100	O	1.03435	11.2202	O	1	100
DA03	1.02308	10	O	1	100	O	1.03418	8.91251	O	1	100
VA04	1.12376	5.01187	O	1.06148	5.62341	O	1.16313	5.01187	O	1.00442	10	O
VB05	1.10426	7.07946	O	1.01257	10	O	1.11853	7.94328	O	1	100
VC02	1.00382	14.1254	O	1.08491	3.54813	O	1.00775	14.1254	O	1	100
DB04	1.98855	2.81838	SR	1.17562	3.54813	O	1.64285	3.16228	O	1	100
AS04	1.10389	5.62341	O	1.06838	5.01187	O	1.14893	5.01187	O	1.02039	5.01187	O
VD05	1.08439	7.07946	O	1.00397	11.2202	O	1.1044	7.07946	O	1	100
VA05	1.10082	6.30957	O	1.02313	7.94328	O	1.13921	6.30957	O	1	100
AVM	1.4962	2.81838	O	96.641	0.001	INPUT	1.05805	5.01187	O	1.14363	3.16228	O
VB06	1.37252	3.54813	O	1.11968	3.98107	O	1.42382	3.54813	O	1.00688	7.07946	O
DA04	1.25324	3.98107	O	1.15156	4.46684	O	1.37457	3.98107	O	1.01881	7.07946	O
DD03	1.03932	10	O	1.00017	19.9526	O	1.05666	10	O	1	100
ALML	1.03582	4.46684	O	95.5922	0.001	INPUT	1	100	O	1.20437	3.54813	O
ALMR	1.01207	6.30957	O	135.935	0.001	INPUT	1.01138	7.07946	O	1.0008	10	O
VC03	1.02349	12.5893	O	1.00009	22.3872	O	1.03869	11.2202	O	1	100
AS05	1.21111	4.46684	O	1.19254	3.98107	O	1.28431	4.46684	O	1.0678	5.01187	O
VD06	1.1437	6.30957	O	1.02129	8.91251	O	1.15415	6.30957	O	1	100
VA06	1.16796	5.01187	O	1.0592	6.30957	O	1.22451	5.01187	O	1	100
VB07	1.1608	3.98107	O	1.07121	4.46684	O	1.11387	5.62341	O	1	100
DB05	1.74715	2.81838	SR	1.14552	4.46684	O	1.61532	3.16228	O	1.02282	7.07946	O
AS06	1.55696	1.77828	O	1.08955	5.01187	O	1.21287	5.01187	O	1.02383	7.07946	O
VD07	1.0743	7.94328	O	1.0063	11.2202	O	1.09753	7.94328	O	1	100
VC04	1.0071	7.07946	O	1.00006	19.9526	O	1.0609	5.62341	O	1	100
DA05	1.28885	3.98107	O	1.15571	4.46684	O	1.422	3.98107	O	1.02188	7.07946	O
VC05	1.43295	2.51189	O	1.00003	22.3872	O	1.02384	7.94328	O	1.00116	6.30957	O
HSNR	1.94228	1.58489	SR	4.30577	1.41254	SR	1.1508	5.62341	O	1.4936	2.51189	O
HSNL	9.7269	1	SR	2.3527	1.41254	SR	1.50567	3.16228	O	2.13863	2.81838	SR
VA07	1.17182	4.46684	O	1.09323	5.01187	O	1.26777	4.46684	O	1.02607	7.07946	O
VB08	1.11251	6.30957	O	1.00311	11.2202	O	1.09159	7.07946	O	1	100
AS07	1.23296	4.46684	O	1.14082	5.01187	O	1.36867	3.98107	O	1.03072	7.07946	O
DD04	1.03412	11.2202	O	1.00021	19.9526	O	1.05263	10	O	1	100
VD08	1.02898	11.2202	O	1.00017	19.9526	O	1.04483	11.2202	O	1	100
VA08	1.07343	5.62341	O	1.00105	14.1254	O	1.11972	5.62341	O	1	100
VB09	1.12164	5.62341	O	1.00176	11.2202	O	1.12531	5.62341	O	1	100
DB06	1.88162	2.81838	SR	1.15929	4.46684	O	1.59146	3.54813	O	1.02475	7.07946	O
AS08	1.25796	3.98107	O	1.11798	5.01187	O	1.42992	3.54813	O	1.01675	8.91251	O
PDEL	98.4889	0.001	SR	1.05196	5.01187	O	1.08497	4.46684	O	1	100	O
VD09	1.06304	8.91251	O	1.00023	19.9526	O	1.03876	11.2202	O	1	100
PDER	72.7687	0.001	SR	1.00012	19.9526	O	1.02327	11.2202	O	1	100
SDQL	1.00271	7.94328	O	4.47988	1.25893	SR	1.00521	7.94328	O	1.00391	8.91251	O
DA06	1.3336	3.98107	O	1.15297	5.01187	O	1.52404	3.54813	O	1.01674	8.91251	O
PVDL	266.094	0.001	INPUT	1.04533	3.98107	O	1.08388	4.46684	O	1	100	O
PVDR	301.902	0.001	INPUT	1.00088	10	O	1.00685	7.07946	O	1.00008	14.1254	O
PVM	6.36361	1.25893	SR	1.00308	7.07946	O	1.00163	14.1254	O	1	100
VA09	1.13311	5.01187	O	1.01561	8.91251	O	1.12984	6.30957	O	1	100
VB10	1.57658	3.16228	O	1.11011	4.46684	O	1.4714	3.54813	O	1.01276	7.94328	O
AS09	1.20182	4.46684	O	1.0985	5.62341	O	1.32967	3.98107	O	1.01133	10	O
DD05	1.08673	7.07946	O	1.00082	15.8489	O	1.05993	8.91251	O	1	100
VD10	1.05354	8.91251	O	1.00011	22.3872	O	1.03352	12.5893	O	1	100
VA10	1.22239	4.46684	O	1.11459	5.01187	O	1.35442	3.98107	O	1.02034	7.94328	O
VB11	1.85036	2.81838	SR	1.0659	5.01187	O	1.37223	3.98107	O	1.01752	7.07946	O
DB07	2.24981	2.51189	SR	1.12647	3.98107	O	1.98418	2.81838	SR	1.01465	7.07946	O
AS10	1.19836	4.46684	O	1.17184	3.98107	O	1.29022	3.98107	O	1.08864	4.46684	O
DA07	1.19073	3.98107	O	1.08918	5.01187	O	1.3161	3.98107	O	1.01179	8.91251	O
VD11	2.42821	1.41254	SR	1.01854	7.07946	O	1.15636	5.01187	O	1.00659	8.91251	O
VA11	1.23435	4.46684	O	1.09146	5.62341	O	1.50344	3.54813	O	1.01162	8.91251	O
AS11	1.2058	5.01187	O	1.08204	5.62341	O	1.38156	3.98107	O	1.01216	8.91251	O
VD12	1.11175	5.62341	O	1.04043	6.30957	O	1.28397	4.46684	O	1	100
PVPR	1.01506	12.5893	O	1	100	O	1.02139	12.5893	O	1	100
PVT	1.05814	4.46684	O	1.25962	3.54813	O	1	100		1.09395	5.01187	O
VA12	1.5259	3.16228	O	1.03232	7.94328	O	3.65665	1.41254	SR	1.00093	14.1254	O
DD06	1.29757	5.01187	O	1.04632	7.94328	O	1.36301	5.01187	O	1.00381	11.2202	O
PVPL	1.03215	7.94328	O	1	100	O	2.05722	1.41254	SR	1	100
DA08	1.2823	4.46684	O	1.07286	6.30957	O	2.93808	1.77828	SR	1.00862	10	O
DA09	1.70189	3.16228	SR	1.04757	7.07946	O	1.80569	3.54813	SR	1.00434	12.5893	O
PDB	1.14865	5.62341	O	1.05094	7.07946	O	1.25341	5.62341	O	1.00669	10	O
VD13	1.28264	5.01187	O	1.03648	7.94328	O	1.48576	4.46684	O	1.00258	12.5893	O
PDA	1.23135	5.01187	O	1.03019	7.94328	O	1.32384	5.01187	O	1.00318	12.5893	O
DVB	1.11836	6.30957	O	1.04965	7.07946	O	1.18772	5.62341	O	1.0032	12.5893	O
DVA	17.6158	1.12202	SR	1.01553	6.30957	O	3.17138	1.41254	SR	1	100
DVC	1.00613	15.8489	O	1	100	O	1.00676	15.8489	O	1	100
PVQR	1.00649	11.2202	O	1.05577	4.46684	O	1.63813	3.16228	O	5.49002	1.25893	SR
PHAL	1.00374	11.2202	O	1	100	O	286.182	0.001	INPUT	1	100	O
PHAR	1.00905	10	O	1	100	O	256.655	0.001	INPUT	1	100
PVQL	1	100	O	1.00742	8.91251	O	7.02304	1.25893	SR	7.10683	1.25893	SR
PLNR	1.00522	7.07946	O	1.00088	10	O	1.00685	7.07946	O	1.00008	14.1254	O
LUAL	10.2632	1.12202	SR	1.1502	3.98107	O	1.4242	3.54813	O	1.0561	3.98107	O
PVCL	6.38211	1.25893	SR	2.21805	1.58489	SR	8.53977	1.25893	SR	1.00235	10	O
PHBR	1.00517	8.91251	O	1.00266	7.07946	O	261.377	0.001	INPUT	1	100	O
ALNL	1	100		1.07495	4.46684	O	1	100		1.02381	7.07946	O
PHBL	1.21176	2.81838	O	1.00235	8.91251	O	296.067	0.001	INPUT	1	100	O
LUAR	2.58462	1.41254	SR	1.09113	4.46684	O	1.24207	3.98107	O	1.00704	8.91251	O
ALNR	1	100	O	1.12285	3.54813	O	1	100	O	1.06971	3.98107	O
PVCR	4.70432	1.25893	SR	2.15196	1.41254	SR	2.18655	2.23872	SR	1	100
PQR	1.03189	7.07946	O	1.3295	2.81838	O	1.26186	3.54813	O	1	100
PVR	6.65596	1.58489	SR	2.80711	1.25893	SR	1.14554	3.98107	O	1.00748	11.2202	O
PVWL	1.60828	2.51189	O	1.43313	3.16228	O	1.17082	4.46684	O	1	100	O
PVWR	1.42284	2.81838	O	1.13994	3.98107	O	1.15024	4.46684	O	1	100	O
PLNL	1.12776	4.46684	O	1.00165	10	O	1.01034	7.07946	O	1.04003	6.30957	O
PHCR	1.61909	2.51189	O	1.0177	6.30957	O	1.20654	3.98107	O	1.00009	15.8489	O
PHCL	9.6701	1	SR	1.02139	8.91251	O	1.35541	4.46684	O	1.00163	14.1254	O
PVNR	1.09649	5.62341	O	4.57073	1.41254	SR	1.52409	3.54813	O	1.01986	7.07946	O
PLMR	188.884	0.001	INPUT	1.33845	3.54813	O	1.2082	4.46684	O	1.02583	6.30957	O
PVNL	1.0945	5.01187	O	8.18753	1.25893	SR	1.26248	4.46684	O	1.0683	5.01187	O
PLML	234.191	0.001	INPUT	1.03232	5.01187	O	1.41718	3.16228	O	1.00055	12.5893	O
